# Supplementary material for: Discovery of Porcine microRNAs and Profiling from Skeletal Muscle Tissues during Development
Source: PLoS One. 2008 Sep 16;3(9):e3225. doi: 10.1371/journal.pone.0003225 (PMC2528944; doi:10.1371/journal.pone.0003225)
Supplement: Table S1 — (0.16 MB XLS) [file pone.0003225.s002.xls]

## Sheet: ST1
Supplemental Table 1: Porcine MiRNA Candidates Revealed by Homonlog Search
MiRNA Sequence	Porcine Trace Archive Sequence	Identity	Alignment Length	Mismatch	Gap	MiRNA Start	MiRNA End	Trace.seq Start	Trace.seq End	E-Value	Bit Score	Probe Name
hsa-mir-22	gnl|ti|1377639070	100	85	0	0	1	85	130	214	3e-41	168	hsa-miR-22
mmu-mir-126	gnl|ti|782932907	100	61	0	0	8	68	602	542	5e-27	121	hsa-miR-126
rno-mir-126	gnl|ti|782932907	100	60	0	0	8	67	602	543	2e-26	119	hsa-miR-126
mmu-mir-683	gnl|ti|1377771481	100	23	0	0	87	109	543	565	0.0004	46.1	mmu-miR-683
mmu-mir-191	gnl|ti|2025394035	100	74	0	0	1	74	208	135	1e-34	147	hsa-miR-191
hsa-mir-103-1	gnl|ti|788167029	100	75	0	0	1	75	572	498	3e-35	149	hsa-miR-103
mmu-mir-204	gnl|ti|780988088	100	68	0	0	1	68	289	222	3e-31	135	hsa-miR-204
hsa-mir-20a	gnl|ti|854114589	100	71	0	0	1	71	428	498	6e-33	141	hsa-miR-20a
rno-mir-331	gnl|ti|1650055657	100	82	0	0	11	92	500	581	3e-39	163	hsa-miR-331
mmu-mir-465	gnl|ti|857257133	100	24	0	0	22	45	721	744	7e-05	48.1	mmu-miR-465
mmu-mir-9-2	gnl|ti|811702618	100	72	0	0	1	72	204	133	1e-33	143	hsa-miR-9
rno-mir-9-3	gnl|ti|1578013263	100	88	0	0	1	88	471	384	9e-43	174	hsa-miR-9
hsa-mir-18a	gnl|ti|854114589	100	71	0	0	1	71	118	188	6e-33	141	hsa-miR-18a
mmu-mir-138-2	gnl|ti|1892543012	100	71	0	0	1	71	422	352	7e-33	141	hsa-miR-138
hsa-mir-455	gnl|ti|1071509208	100	96	0	0	1	96	520	615	1e-47	190	PREDICTED_MIR157
hsa-mir-125b-2	gnl|ti|784075421	100	89	0	0	1	89	448	536	1e-43	176	hsa-miR-125b
hsa-mir-520c	gnl|ti|2027434776	100	24	0	0	39	62	920	897	0.0001	48.1	hsa-miR-520b
mmu-mir-196b	gnl|ti|855375818	100	85	0	0	1	85	424	508	3e-41	168	hsa-miR-196b
hsa-mir-190	gnl|ti|2031707770	100	85	0	0	1	85	753	669	4e-42	168	hsa-miR-190
hsa-mir-421	gnl|ti|860818904	100	85	0	0	1	85	235	319	3e-41	168	PREDICTED_MIR120
ssc-mir-181c	gnl|ti|851416912	100	87	0	0	1	87	190	276	2e-42	172	hsa-miR-181c
hsa-mir-99b	gnl|ti|1577748729	100	70	0	0	1	70	168	99	4e-32	139	hsa-miR-99b
ssc-mir-217	gnl|ti|857204980	100	107	0	0	1	107	164	270	3e-54	212	hsa-miR-217
hsa-mir-19a	gnl|ti|854114589	100	82	0	0	1	82	258	339	2e-39	163	hsa-miR-19a
ssc-mir-205	gnl|ti|810711243	100	69	0	0	1	69	417	349	8e-32	137	hsa-miR-205
rno-let-7f-2	gnl|ti|858853882	100	83	0	0	1	83	506	424	5e-40	165	hsa-let-7f
ssc-let-7c	gnl|ti|770231893	100	94	0	0	1	94	261	168	2e-46	186	hsa-let-7c
rno-let-7c-2	gnl|ti|770231893	100	23	0	0	14	36	246	224	0.0004	46.1	hsa-let-7c
hsa-mir-7-2	gnl|ti|860614164	100	24	0	0	32	55	239	216	0.0001	48.1	rno-miR-7
mmu-mir-320	gnl|ti|2027985691	100	67	0	0	10	76	412	346	2e-30	133	hsa-miR-320
mmu-mir-199a-1	gnl|ti|2019854499	100	28	0	0	43	70	438	411	4e-07	56	hsa-miR-199a*
ssc-mir-30c	gnl|ti|854287390	100	80	0	0	1	80	136	215	3e-38	159	hsa-miR-30c
mmu-let-7c-2	gnl|ti|770231893	100	23	0	0	14	36	246	224	0.0004	46.1	hsa-let-7c
rno-mir-101a	gnl|ti|1658582760	100	75	0	0	1	75	440	514	3e-35	149	hsa-miR-101
hsa-mir-219-2	gnl|ti|2020443958	100	97	0	0	1	97	369	273	4e-48	192	hsa-miR-219
mmu-mir-101a	gnl|ti|1658582760	100	83	0	0	1	83	436	518	6e-40	165	hsa-miR-101
rno-let-7i	gnl|ti|851409191	100	85	0	0	1	85	552	468	3e-41	168	hsa-let-7i
mmu-mir-300	gnl|ti|821014045	100	23	0	0	45	67	140	162	0.0003	46.1	mmu-miR-300
hsa-mir-565	gnl|ti|781394368	100	70	0	0	1	70	238	307	3e-32	139	hsa-miR-565
mmu-mir-9-1	gnl|ti|847818310	100	89	0	0	1	89	408	496	1e-43	176	hsa-miR-9
ssc-mir-125b	gnl|ti|784075421	100	89	0	0	1	89	448	536	1e-43	176	hsa-miR-125b
rno-mir-196b	gnl|ti|855375818	100	85	0	0	1	85	424	508	3e-41	168	hsa-miR-196b
ssc-mir-216	gnl|ti|855841105	100	105	0	0	1	105	144	40	5e-53	208	hsa-miR-216
mmu-mir-712	gnl|ti|2020515217	100	24	0	0	35	58	12	35	0.0002	48.1	mmu-miR-712*
hsa-mir-516-1	gnl|ti|2027434776	100	24	0	0	42	65	920	897	0.0001	48.1	hsa-miR-516-3p
mmu-mir-503	gnl|ti|1420804291	100	30	0	0	1	30	404	433	3e-08	60	mmu-miR-503
hsa-mir-30c-2	gnl|ti|854287390	100	68	0	0	1	68	139	206	4e-31	135	hsa-miR-30c
hsa-mir-365-1	gnl|ti|2024907338	100	87	0	0	1	87	545	459	3e-42	172	hsa-miR-365
ssc-mir-124a	gnl|ti|851501889	100	85	0	0	1	85	620	536	3e-41	168	hsa-miR-124a
mmu-mir-149	gnl|ti|1674420568	100	23	0	0	40	62	171	193	0.0004	46.1	hsa-miR-149
hsa-mir-520b	gnl|ti|2027434776	100	24	0	0	26	49	920	897	7e-05	48.1	hsa-miR-520b
mmu-mir-142	gnl|ti|2025887896	100	64	0	0	1	64	496	559	1e-28	127	hsa-miR-142-5p
ssc-mir-139	gnl|ti|853262266	100	69	0	0	1	69	207	139	9e-32	137	hsa-miR-139
ssc-mir-323	gnl|ti|784774959	100	86	0	0	1	86	174	259	8e-42	170	hsa-miR-323
ssc-mir-135-1	gnl|ti|808779242	100	90	0	0	1	90	105	194	3e-44	178	hsa-miR-135a
hsa-mir-135a-2	gnl|ti|311883554	100	100	0	0	1	100	558	657	5e-50	198	hsa-miR-135a
rno-mir-137	gnl|ti|470939879	100	99	0	0	4	102	428	526	2e-49	196	hsa-miR-137
hsa-mir-16-1	gnl|ti|1579971821	100	87	0	0	1	87	290	204	4e-42	172	hsa-miR-16
hsa-mir-330	gnl|ti|1890822188	100	89	0	0	1	89	422	334	2e-43	176	hsa-miR-330
mmu-mir-411	gnl|ti|851621265	100	82	0	0	1	82	311	392	2e-39	163	mmu-miR-411
hsa-mir-649	gnl|ti|780969017	100	26	0	0	63	88	152	177	6e-06	52	hsa-miR-649
rno-mir-339	gnl|ti|810794926	100	25	0	0	13	37	529	505	2e-05	50.1	hsa-miR-339
ssc-mir-7	gnl|ti|860614164	100	109	0	0	1	109	261	153	2e-55	216	rno-miR-7
rno-mir-124a-1	gnl|ti|1420670121	100	85	0	0	1	85	344	428	5e-41	168	hsa-miR-124a
hsa-mir-607	gnl|ti|1574952502	100	28	0	0	44	71	544	571	6e-07	56	hsa-miR-607
mmu-mir-344	gnl|ti|781566142	100	23	0	0	67	89	271	293	0.0003	46.1	mmu-miR-344
hsa-mir-107	gnl|ti|1577516174	100	81	0	0	1	81	143	223	1e-38	161	hsa-miR-107
ssc-mir-105-1	gnl|ti|773999917	100	81	0	0	1	81	107	187	8e-39	161	hsa-miR-105
mmu-mir-199a-2	gnl|ti|1377265104	100	67	0	0	37	103	62	128	2e-30	133	hsa-miR-199a*
ssc-mir-148a	gnl|ti|808433769	100	68	0	0	1	68	297	364	3e-31	135	hsa-miR-148a
rno-mir-153	gnl|ti|808289279	100	87	0	0	1	87	448	362	2e-42	172	hsa-miR-153
ssc-mir-29b	gnl|ti|860609555	100	81	0	0	1	81	191	271	7e-39	161	hsa-miR-29b
rno-mir-199a	gnl|ti|1377265104	100	67	0	0	37	103	62	128	2e-30	133	hsa-miR-199a*
hsa-mir-1-2	gnl|ti|1071489049	100	85	0	0	1	85	463	379	4e-41	168	hsa-miR-1
ssc-mir-135-2	gnl|ti|311883554	100	100	0	0	1	100	558	657	5e-50	198	hsa-miR-135a
hsa-mir-375	gnl|ti|855392649	100	64	0	0	1	64	307	244	8e-29	127	hsa-miR-375
hsa-mir-128a	gnl|ti|854163515	100	82	0	0	1	82	321	240	2e-39	163	hsa-miR-128a
ssc-mir-9-2	gnl|ti|811702618	100	87	0	0	1	87	212	126	2e-42	172	hsa-miR-9
mmu-let-7f-2	gnl|ti|858853882	100	83	0	0	1	83	506	424	5e-40	165	hsa-let-7f
ssc-mir-128a	gnl|ti|854163515	100	82	0	0	1	82	321	240	2e-39	163	hsa-miR-128a
ssc-mir-21	gnl|ti|774240118	100	92	0	0	1	92	518	609	2e-45	182	hsa-miR-21
ssc-let-7f	gnl|ti|858853882	100	83	0	0	1	83	506	424	5e-40	165	hsa-let-7f
ssc-mir-32	gnl|ti|812745366	100	70	0	0	1	70	154	223	2e-32	139	hsa-miR-32
hsa-mir-199a-2	gnl|ti|1377265104	100	67	0	0	37	103	62	128	2e-30	133	hsa-miR-199a*
ssc-mir-106a	gnl|ti|810890216	100	81	0	0	1	81	618	698	7e-39	161	hsa-miR-106a
mmu-mir-22	gnl|ti|1377639070	100	94	0	0	2	95	127	220	2e-46	186	hsa-miR-22
ssc-mir-183	gnl|ti|769733119	100	70	0	0	1	70	253	322	2e-32	139	hsa-miR-183
hsa-mir-99a	gnl|ti|2020960585	100	81	0	0	1	81	258	338	1e-38	161	hsa-miR-99a
hsa-mir-103-2	gnl|ti|2022952882	100	76	0	0	1	76	704	629	9e-36	151	hsa-miR-103
hsa-mir-493	gnl|ti|857611231	100	24	0	0	63	86	282	259	8e-05	48.1	hsa-miR-493-3p
hsa-mir-181b-2	gnl|ti|2025412733	100	89	0	0	1	89	534	622	2e-43	176	hsa-miR-181b
ssc-mir-224	gnl|ti|781152417	100	81	0	0	1	81	387	307	7e-39	161	hsa-miR-224
mmu-mir-375	gnl|ti|855392649	100	64	0	0	1	64	307	244	8e-29	127	hsa-miR-375
mmu-mir-331	gnl|ti|1650055657	100	83	0	0	10	92	499	581	8e-40	165	hsa-miR-331
hsa-mir-140	gnl|ti|1890332032	100	94	0	0	7	100	649	556	2e-46	186	rno-miR-140*
hsa-mir-124a-1	gnl|ti|1420670121	100	85	0	0	1	85	344	428	5e-41	168	hsa-miR-124a
mmu-let-7i	gnl|ti|851409191	100	85	0	0	1	85	552	468	3e-41	168	hsa-let-7i
hsa-mir-382	gnl|ti|775596795	100	76	0	0	1	76	222	147	7e-36	151	hsa-miR-382
ssc-mir-24	gnl|ti|857719464	100	72	0	0	1	72	349	278	1e-33	143	hsa-miR-24
mmu-mir-26a-1	gnl|ti|808774478	100	24	0	0	16	39	356	333	8e-05	48.1	hsa-miR-26a
rno-mir-203	gnl|ti|1381008164	100	23	0	0	75	97	679	701	0.0004	46.1	hsa-miR-203
mmu-mir-7-2	gnl|ti|860614164	100	24	0	0	19	42	239	216	9e-05	48.1	rno-miR-7
ssc-mir-196	gnl|ti|788171134	100	107	0	0	1	107	256	362	3e-54	212	hsa-miR-196a
mmu-mir-669a-3	gnl|ti|808854353	100	23	0	0	5	27	421	399	0.0004	46.1	mmu-miR-669a
ssc-mir-20	gnl|ti|854114589	100	71	0	0	1	71	428	498	6e-33	141	hsa-miR-20a
mmu-mir-25	gnl|ti|1420207354	100	84	0	0	1	84	355	438	2e-40	167	hsa-miR-25
hsa-mir-652	gnl|ti|848594432	100	94	0	0	1	94	208	301	2e-46	186	hsa-miR-652
rno-mir-497	gnl|ti|1420605857	100	69	0	0	1	69	424	356	1e-31	137	hsa-miR-497
ssc-mir-107	gnl|ti|1577516174	100	87	0	0	1	87	141	227	3e-42	172	hsa-miR-107
hsa-mir-552	gnl|ti|848152925	100	27	0	0	10	36	178	204	2e-06	54	hsa-miR-552
hsa-mir-26a-2	gnl|ti|808774478	100	84	0	0	1	84	369	286	1e-40	167	hsa-miR-26a
hsa-mir-25	gnl|ti|1420207354	100	84	0	0	1	84	355	438	2e-40	167	hsa-miR-25
rno-mir-9-2	gnl|ti|811702618	100	87	0	0	1	87	212	126	2e-42	172	hsa-miR-9
mmu-mir-137	gnl|ti|470939879	100	73	0	0	1	73	439	511	5e-34	145	hsa-miR-137
hsa-mir-142	gnl|ti|2025887896	100	87	0	0	1	87	484	570	3e-42	172	hsa-miR-142-5p
ssc-mir-204	gnl|ti|780988088	100	109	0	0	1	109	315	207	2e-55	216	hsa-miR-204
mmu-mir-140	gnl|ti|854805684	100	70	0	0	1	70	315	246	2e-32	139	rno-miR-140*
hsa-let-7i	gnl|ti|851409191	100	84	0	0	1	84	552	469	1e-40	167	hsa-let-7i
mmu-mir-669a-2	gnl|ti|854195075	100	23	0	0	5	27	105	127	0.0004	46.1	mmu-miR-669a
mmu-mir-669a-1	gnl|ti|854195075	100	23	0	0	3	25	105	127	0.0004	46.1	mmu-miR-669a
mmu-mir-450-2	gnl|ti|2022448421	100	27	0	0	2	28	758	784	1e-06	54	hsa-miR-450
hsa-mir-24-1	gnl|ti|447575473	100	68	0	0	1	68	528	595	4e-31	135	hsa-miR-24
ssc-mir-145	gnl|ti|770485765	100	86	0	0	1	86	280	365	8e-42	170	hsa-miR-145
ssc-mir-19a	gnl|ti|854114589	100	82	0	0	1	82	258	339	2e-39	163	hsa-miR-19a
hsa-mir-153-2	gnl|ti|808289279	100	87	0	0	1	87	448	362	2e-42	172	hsa-miR-153
rno-mir-505	gnl|ti|1145804972	100	67	0	0	1	67	746	680	2e-30	133	hsa-miR-505
ssc-mir-326	gnl|ti|810964441	100	91	0	0	1	91	323	233	9e-45	180	hsa-miR-326
mmu-mir-196a-2	gnl|ti|788171134	100	85	0	0	1	85	262	346	3e-41	168	hsa-miR-196a
mmu-mir-669b	gnl|ti|1579328517	100	27	0	0	61	87	812	786	3e-06	54	mmu-miR-669b
hsa-mir-15a	gnl|ti|1579971821	100	83	0	0	1	83	430	348	8e-40	165	hsa-miR-15a
hsa-mir-26a-1	gnl|ti|808774478	100	24	0	0	10	33	356	333	7e-05	48.1	hsa-miR-26a
hsa-mir-138-2	gnl|ti|1892543012	100	83	0	0	2	84	429	347	6e-40	165	hsa-miR-138
hsa-mir-9-1	gnl|ti|847818310	100	89	0	0	1	89	408	496	1e-43	176	hsa-miR-9
mmu-mir-124a-1	gnl|ti|1420670121	100	85	0	0	1	85	344	428	5e-41	168	hsa-miR-124a
rno-mir-9-1	gnl|ti|847818310	100	89	0	0	1	89	408	496	1e-43	176	hsa-miR-9
ssc-mir-153	gnl|ti|808289279	100	87	0	0	1	87	448	362	2e-42	172	hsa-miR-153
ssc-let-7i	gnl|ti|851409191	100	85	0	0	1	85	552	468	3e-41	168	hsa-let-7i
mmu-mir-99b	gnl|ti|1577748729	100	70	0	0	1	70	168	99	4e-32	139	hsa-miR-99b
hsa-mir-137	gnl|ti|470939879	100	102	0	0	1	102	425	526	4e-51	202	hsa-miR-137
mmu-mir-181a-2	gnl|ti|2027995419	100	33	0	0	5	37	204	172	4e-10	65.9	hsa-miR-181a
ssc-mir-9-1	gnl|ti|847818310	100	89	0	0	1	89	408	496	1e-43	176	hsa-miR-9
hsa-mir-92-1	gnl|ti|1579909838	100	78	0	0	1	78	229	306	7e-37	155	hsa-miR-92
rno-mir-26a	gnl|ti|808774478	100	24	0	0	16	39	356	333	8e-05	48.1	hsa-miR-26a
ssc-mir-27a	gnl|ti|774093201	100	82	0	0	1	82	502	583	2e-39	163	hsa-miR-27a
rno-mir-493	gnl|ti|857611231	100	24	0	0	60	83	282	259	8e-05	48.1	hsa-miR-493-3p
mmu-mir-361	gnl|ti|532141038	100	23	0	0	28	50	138	160	0.0003	46.1	hsa-miR-361
ssc-mir-23a	gnl|ti|774093201	100	70	0	0	1	70	325	394	2e-32	139	hsa-miR-23a
rno-mir-300	gnl|ti|821014045	100	23	0	0	45	67	140	162	0.0003	46.1	mmu-miR-300
hsa-mir-196b	gnl|ti|855375818	100	84	0	0	1	84	425	508	1e-40	167	hsa-miR-196b
hsa-mir-208	gnl|ti|2020163214	100	71	0	0	1	71	403	333	8e-33	141	hsa-miR-208
ssc-mir-26a	gnl|ti|808774478	100	84	0	0	1	84	369	286	1e-40	167	hsa-miR-26a
hsa-mir-19b-1	gnl|ti|1579909838	100	87	0	0	1	87	107	193	4e-42	172	hsa-miR-19b
hsa-mir-516-2	gnl|ti|2027434776	100	24	0	0	42	65	920	897	0.0001	48.1	hsa-miR-516-3p
hsa-mir-636	gnl|ti|768214862	100	26	0	0	74	99	528	503	8e-06	52	hsa-miR-636
ssc-mir-184	gnl|ti|820996191	100	83	0	0	1	83	428	346	5e-40	165	hsa-miR-184
hsa-mir-133a-1	gnl|ti|1377348660	100	87	0	0	2	88	300	386	2e-42	172	hsa-miR-133a
mmu-mir-128a	gnl|ti|854163515	100	70	0	0	1	70	315	246	2e-32	139	hsa-miR-128a
ssc-mir-95	gnl|ti|863198334	100	81	0	0	1	81	270	350	1e-38	161	hsa-miR-95
mmu-mir-297b	gnl|ti|857792782	100	23	0	0	2	24	251	229	0.0004	46.1	mmu-miR-297b
rno-mir-21	gnl|ti|774240118	100	92	0	0	1	92	518	609	2e-45	182	hsa-miR-21
mmu-mir-124a-3	gnl|ti|1420458710	100	64	0	0	5	68	479	542	1e-28	127	hsa-miR-124a
hsa-let-7f-2	gnl|ti|858853882	100	83	0	0	1	83	506	424	5e-40	165	hsa-let-7f
mmu-mir-9-3	gnl|ti|1578013263	100	90	0	0	1	90	471	382	6e-44	178	hsa-miR-9
rno-mir-125b-2	gnl|ti|784075421	100	85	0	0	1	85	448	532	3e-41	168	hsa-miR-125b
ssc-mir-122a	gnl|ti|788143419	100	85	0	0	1	85	249	165	3e-41	168	hsa-miR-122a
hsa-mir-594	gnl|ti|781565595	100	63	0	0	1	63	278	340	4e-28	125	hsa-miR-594
hsa-mir-101-2	gnl|ti|2024281437	100	79	0	0	1	79	457	535	1e-37	157	hsa-miR-101
rno-mir-142	gnl|ti|2025887896	100	87	0	0	1	87	484	570	3e-42	172	hsa-miR-142-5p
mmu-mir-339	gnl|ti|1671893365	100	24	0	0	16	39	229	206	0.0002	48.1	hsa-miR-339
rno-mir-99b	gnl|ti|1577748729	100	70	0	0	1	70	168	99	4e-32	139	hsa-miR-99b
ssc-mir-140	gnl|ti|854805684	100	70	0	0	1	70	315	246	2e-32	139	rno-miR-140*
mmu-mir-721	gnl|ti|769861247	100	23	0	0	63	85	332	354	0.0003	46.1	mmu-miR-721
rno-mir-128a	gnl|ti|854163515	100	82	0	0	1	82	321	240	2e-39	163	hsa-miR-128a
hsa-mir-526b	gnl|ti|1383090680	100	25	0	0	2	26	477	501	3e-05	50.1	hsa-miR-526b
ssc-mir-181b	gnl|ti|785910661	100	86	0	0	1	86	63	148	8e-42	170	hsa-miR-181b
ssc-mir-214	gnl|ti|774493898	100	110	0	0	1	110	191	300	5e-56	218	hsa-miR-214
ssc-mir-136	gnl|ti|848311590	100	82	0	0	1	82	148	67	2e-39	163	hsa-miR-136
ssc-mir-186	gnl|ti|811041261	100	82	0	0	1	82	436	517	2e-39	163	hsa-miR-186
hsa-mir-9-2	gnl|ti|811702618	100	87	0	0	1	87	212	126	2e-42	172	hsa-miR-9
ssc-mir-103	gnl|ti|788167029	100	82	0	0	1	82	574	493	2e-39	163	hsa-miR-103
ssc-mir-18	gnl|ti|854114589	100	92	0	0	1	92	110	201	2e-45	182	hsa-miR-18a
hsa-mir-199b	gnl|ti|2019854499	100	109	0	0	2	110	498	390	3e-55	216	hsa-miR-199a*
hsa-mir-214	gnl|ti|1379931489	99.09	110	1	0	1	110	238	347	1e-53	210	hsa-miR-214
mmu-mir-214	gnl|ti|1379931489	99.09	110	1	0	1	110	238	347	1e-53	210	hsa-miR-214
mmu-mir-423	gnl|ti|470927342	99.08	109	1	0	1	109	292	400	6e-53	208	hsa-miR-423
hsa-mir-7-1	gnl|ti|860614164	99.08	109	1	0	2	110	261	153	5e-53	208	rno-miR-7
rno-mir-196a	gnl|ti|788171134	99.07	107	1	0	4	110	256	362	8e-52	204	hsa-miR-196a
hsa-mir-192	gnl|ti|2023458960	99.06	106	1	0	5	110	418	313	4e-51	202	hsa-miR-192
mmu-let-7d	gnl|ti|1380820092	99.03	103	1	0	1	103	261	363	2e-49	196	hsa-let-7d
rno-mir-10b	gnl|ti|2022730406	99.01	101	1	0	9	109	572	472	4e-48	192	hsa-miR-10b
rno-mir-183	gnl|ti|769733119	98.99	99	1	0	12	110	243	341	5e-47	188	hsa-miR-183
rno-mir-124a-2	gnl|ti|1672109445	98.98	98	1	0	12	109	628	531	3e-46	186	hsa-miR-124a
mmu-mir-124a-2	gnl|ti|1672109445	98.98	98	1	0	12	109	628	531	3e-46	186	hsa-miR-124a
mmu-mir-219-2	gnl|ti|2020443958	98.97	97	1	0	1	97	369	273	9e-46	184	hsa-miR-219
mmu-mir-135a-2	gnl|ti|757422930	98.96	96	1	0	1	96	337	432	3e-45	182	hsa-miR-135a
rno-mir-135a	gnl|ti|757422930	98.96	96	1	0	1	96	337	432	3e-45	182	hsa-miR-135a
hsa-mir-411	gnl|ti|851621265	98.96	96	1	0	1	96	311	406	3e-45	182	mmu-miR-411
hsa-mir-124a-2	gnl|ti|1672109445	98.95	95	1	0	15	109	625	531	2e-44	180	hsa-miR-124a
hsa-mir-592	gnl|ti|1661411201	98.95	95	0	1	1	95	316	409	3e-42	172	hsa-miR-592
hsa-mir-183	gnl|ti|769733119	98.95	95	1	0	12	106	243	337	1e-44	180	hsa-miR-183
rno-let-7c-1	gnl|ti|770231893	98.94	94	1	0	1	94	261	168	4e-44	178	hsa-let-7c
rno-mir-22	gnl|ti|1377639070	98.94	94	1	0	2	95	127	220	4e-44	178	hsa-miR-22
hsa-mir-340	gnl|ti|1071491237	98.94	94	1	0	2	95	809	716	5e-44	178	hsa-miR-340
mmu-let-7c-1	gnl|ti|770231893	98.94	94	1	0	1	94	261	168	4e-44	178	hsa-let-7c
rno-mir-181c	gnl|ti|851416912	98.92	93	1	0	10	102	190	282	2e-43	176	hsa-miR-181c
mmu-mir-21	gnl|ti|774240118	98.91	92	1	0	1	92	518	609	6e-43	174	hsa-miR-21
rno-mir-15b	gnl|ti|2020963412	98.91	92	1	0	7	98	398	489	8e-43	174	hsa-miR-15b
mmu-mir-18	gnl|ti|854114589	98.91	92	1	0	4	95	110	201	6e-43	174	hsa-miR-18a
rno-mir-129-2	gnl|ti|311625830	98.91	92	1	0	4	95	653	562	8e-43	174	rno-miR-129
rno-mir-18	gnl|ti|854114589	98.91	92	1	0	4	95	110	201	6e-43	174	hsa-miR-18a
rno-mir-191	gnl|ti|2025394035	98.9	91	1	0	1	91	216	126	3e-42	172	hsa-miR-191
hsa-mir-135a-1	gnl|ti|808779242	98.89	90	1	0	1	90	105	194	8e-42	170	hsa-miR-135a
hsa-mir-9-3	gnl|ti|1578013263	98.89	90	1	0	1	90	471	382	1e-41	170	hsa-miR-9
hsa-mir-331	gnl|ti|1650055657	98.89	90	0	1	1	90	491	579	3e-39	163	hsa-miR-331
hsa-mir-153-1	gnl|ti|1661405905	98.89	90	1	0	1	90	288	199	1e-41	170	hsa-miR-153
mmu-mir-133b	gnl|ti|1579262160	98.88	89	1	0	16	104	177	89	8e-41	168	hsa-miR-133b
mmu-mir-592	gnl|ti|1661411201	98.88	89	0	1	4	92	316	403	1e-38	161	hsa-miR-592
mmu-mir-29c	gnl|ti|855837607	98.86	88	1	0	1	88	552	639	3e-41	168	hsa-miR-29c
hsa-mir-29c	gnl|ti|855837607	98.86	88	1	0	1	88	552	639	3e-41	168	hsa-miR-29c
rno-mir-29c	gnl|ti|855837607	98.86	88	1	0	1	88	552	639	3e-41	168	hsa-miR-29c
ssc-mir-29c	gnl|ti|1374884635	98.86	88	1	0	1	88	507	594	3e-41	168	hsa-miR-29c
hsa-let-7d	gnl|ti|1380820092	98.85	87	1	0	1	87	269	355	6e-40	165	hsa-let-7d
mmu-mir-181c	gnl|ti|851416912	98.85	87	1	0	3	89	190	276	5e-40	165	hsa-miR-181c
mmu-mir-107	gnl|ti|1577516174	98.85	87	1	0	1	87	141	227	9e-40	165	hsa-miR-107
mmu-mir-365-1	gnl|ti|2024907338	98.85	87	1	0	1	87	545	459	7e-40	165	hsa-miR-365
hsa-mir-125b-1	gnl|ti|1420730003	98.85	87	1	0	1	87	136	50	9e-40	165	hsa-miR-125b
rno-mir-124a-3	gnl|ti|1420458710	98.85	87	1	0	1	87	466	552	9e-40	165	hsa-miR-124a
hsa-mir-124a-3	gnl|ti|1420458710	98.85	87	1	0	1	87	466	552	9e-40	165	hsa-miR-124a
rno-mir-133a	gnl|ti|1377348660	98.85	87	1	0	1	87	300	386	5e-40	165	hsa-miR-133a
rno-mir-107	gnl|ti|1577516174	98.85	87	1	0	1	87	141	227	9e-40	165	hsa-miR-107
hsa-mir-145	gnl|ti|1380948945	98.84	86	1	0	1	86	129	214	2e-39	163	hsa-miR-145
rno-mir-365	gnl|ti|858826997	98.84	86	1	0	1	86	418	333	2e-39	163	hsa-miR-365
hsa-mir-323	gnl|ti|784774959	98.84	86	1	0	1	86	174	259	2e-39	163	hsa-miR-323
rno-mir-323	gnl|ti|784774959	98.84	86	1	0	1	86	174	259	2e-39	163	hsa-miR-323
mmu-mir-323	gnl|ti|784774959	98.84	86	1	0	1	86	174	259	2e-39	163	hsa-miR-323
rno-mir-181b-1	gnl|ti|2031884044	98.84	86	1	0	23	108	624	539	4e-40	163	hsa-miR-181b
rno-mir-190	gnl|ti|2031707770	98.82	85	1	0	1	85	753	669	1e-39	161	hsa-miR-190
hsa-mir-17	gnl|ti|1579909832	98.82	85	0	1	1	84	458	374	3e-36	153	hsa-miR-17-5p
mmu-mir-425	gnl|ti|1382485284	98.82	85	1	0	1	85	542	626	9e-39	161	hsa-miR-425
hsa-mir-491	gnl|ti|2023217678	98.81	84	1	0	1	84	696	613	4e-38	159	hsa-miR-491
rno-mir-133b	gnl|ti|1579262160	98.81	84	1	0	1	84	174	91	5e-38	159	hsa-miR-133b
hsa-mir-487b	gnl|ti|851619303	98.81	84	1	0	1	84	337	254	3e-38	159	hsa-miR-487b
hsa-let-7c	gnl|ti|770231893	98.81	84	1	0	1	84	256	173	3e-38	159	hsa-let-7c
mmu-mir-497	gnl|ti|1420605857	98.8	83	1	0	1	83	436	354	2e-37	157	hsa-miR-497
hsa-mir-324	gnl|ti|1420583191	98.8	83	1	0	1	83	399	481	2e-37	157	hsa-miR-324-3p
rno-mir-136	gnl|ti|848311590	98.78	82	1	0	1	82	148	67	5e-37	155	hsa-miR-136
hsa-mir-30b	gnl|ti|1574275341	98.78	82	1	0	7	88	415	496	8e-37	155	hsa-miR-30b
hsa-mir-136	gnl|ti|848311590	98.78	82	1	0	1	82	148	67	5e-37	155	hsa-miR-136
mmu-mir-103-1	gnl|ti|788167029	98.78	82	1	0	3	84	574	493	5e-37	155	hsa-miR-103
mmu-mir-19a	gnl|ti|854114589	98.78	82	1	0	1	82	258	339	5e-37	155	hsa-miR-19a
rno-mir-103-1	gnl|ti|788167029	98.78	82	1	0	3	84	574	493	5e-37	155	hsa-miR-103
mmu-mir-29b-2	gnl|ti|470953955	98.77	81	1	0	1	81	73	153	2e-36	153	hsa-miR-29b
hsa-mir-105-1	gnl|ti|773999917	98.77	81	1	0	1	81	107	187	2e-36	153	hsa-miR-105
hsa-mir-615	gnl|ti|2024737808	98.77	81	1	0	1	81	171	251	3e-36	153	hsa-miR-615
rno-mir-29b-2	gnl|ti|470953955	98.77	81	1	0	1	81	73	153	2e-36	153	hsa-miR-29b
hsa-mir-185	gnl|ti|1575367821	98.77	81	1	0	2	82	272	192	3e-36	153	hsa-miR-185
hsa-mir-29b-2	gnl|ti|470953955	98.77	81	1	0	1	81	73	153	2e-36	153	hsa-miR-29b
hsa-mir-29b-1	gnl|ti|860609555	98.77	81	1	0	1	81	191	271	2e-36	153	hsa-miR-29b
hsa-mir-105-2	gnl|ti|774203708	98.77	81	0	1	1	81	440	361	5e-34	145	hsa-miR-105
rno-mir-30c-2	gnl|ti|854287390	98.75	80	1	0	5	84	136	215	7e-36	151	hsa-miR-30c
rno-mir-138-2	gnl|ti|1892543012	98.75	80	1	0	1	80	429	350	9e-36	151	hsa-miR-138
mmu-mir-181b-1	gnl|ti|2031884044	98.75	80	1	0	1	80	622	543	1e-36	151	hsa-miR-181b
rno-mir-382	gnl|ti|775596795	98.75	80	1	0	1	80	224	145	7e-36	151	hsa-miR-382
rno-mir-421	gnl|ti|860818904	98.73	79	1	0	1	79	236	314	3e-35	149	PREDICTED_MIR120
hsa-let-7e	gnl|ti|1577748346	98.73	79	1	0	1	79	525	603	5e-35	149	hsa-let-7e
mmu-mir-181a-1	gnl|ti|2031884044	98.73	79	1	0	1	79	797	719	4e-36	149	hsa-miR-181a
hsa-mir-320	gnl|ti|2027985691	98.72	78	1	0	4	81	418	341	2e-34	147	hsa-miR-320
rno-mir-29b-1	gnl|ti|860609555	98.72	78	1	0	1	78	191	268	1e-34	147	hsa-miR-29b
hsa-mir-96	gnl|ti|489060073	98.7	77	1	0	2	78	241	317	5e-34	145	hsa-miR-96
mmu-mir-125b-1	gnl|ti|1420730003	98.7	77	1	0	1	77	136	60	7e-34	145	hsa-miR-125b
mmu-mir-382	gnl|ti|775596795	98.68	76	1	0	1	76	222	147	2e-33	143	hsa-miR-382
hsa-mir-363	gnl|ti|532116430	98.67	75	1	0	1	75	426	500	8e-33	141	hsa-miR-363*
hsa-mir-101-1	gnl|ti|1658582760	98.67	75	1	0	1	75	440	514	8e-33	141	hsa-miR-101
hsa-mir-126	gnl|ti|782932907	98.65	74	1	0	1	74	615	542	3e-32	139	hsa-miR-126
hsa-mir-383	gnl|ti|812827876	98.63	73	1	0	1	73	540	612	9e-32	137	hsa-miR-383
hsa-mir-125a	gnl|ti|1577748930	98.63	73	1	0	14	86	343	415	2e-31	137	hsa-miR-125a
hsa-mir-129-1	gnl|ti|159494101	98.61	72	1	0	1	72	550	621	4e-31	135	rno-miR-129
hsa-mir-21	gnl|ti|774240118	98.61	72	1	0	1	72	528	599	4e-31	135	hsa-miR-21
mmu-mir-29b-1	gnl|ti|860609555	98.59	71	1	0	1	71	195	265	1e-30	133	hsa-miR-29b
hsa-mir-32	gnl|ti|812745366	98.57	70	1	0	1	70	154	223	5e-30	131	hsa-miR-32
mmu-mir-183	gnl|ti|769733119	98.57	70	1	0	1	70	253	322	6e-30	131	hsa-miR-183
mmu-mir-125b-2	gnl|ti|784075421	98.57	70	1	0	2	71	459	528	5e-30	131	hsa-miR-125b
mmu-mir-32	gnl|ti|812745366	98.57	70	1	0	1	70	154	223	5e-30	131	hsa-miR-32
rno-mir-138-1	gnl|ti|532164048	98.55	69	1	0	16	84	414	346	4e-29	129	hsa-miR-138
mmu-mir-133a-1	gnl|ti|1377348660	98.53	68	1	0	1	68	309	376	8e-29	127	hsa-miR-133a
hsa-mir-376a-1	gnl|ti|1008637782	98.53	68	1	0	1	68	129	196	1e-28	127	hsa-miR-376a
mmu-mir-24-1	gnl|ti|447575473	98.53	68	1	0	1	68	528	595	1e-28	127	hsa-miR-24
hsa-mir-148a	gnl|ti|808433769	98.53	68	1	0	1	68	297	364	8e-29	127	hsa-miR-148a
rno-mir-24-1	gnl|ti|447575473	98.53	68	1	0	1	68	528	595	1e-28	127	hsa-miR-24
mmu-mir-10b	gnl|ti|1420091182	98.53	68	1	0	1	68	633	700	1e-28	127	hsa-miR-10b
mmu-mir-153	gnl|ti|808289279	98.51	67	1	0	3	69	437	371	3e-28	125	hsa-miR-153
mmu-mir-190	gnl|ti|2031707770	98.51	67	1	0	1	67	744	678	4e-29	125	hsa-miR-190
hsa-mir-30d	gnl|ti|1008617003	98.51	67	1	0	1	67	382	316	4e-28	125	hsa-miR-30d
mmu-mir-496	gnl|ti|1420967687	98.48	66	1	0	8	73	83	148	3e-27	123	hsa-miR-496
mmu-mir-185	gnl|ti|1575367821	98.48	66	0	1	1	65	265	200	5e-25	115	hsa-miR-185
hsa-mir-368	gnl|ti|808306717	98.48	66	1	0	1	66	171	106	1e-27	123	hsa-miR-368
mmu-mir-122a	gnl|ti|788143419	98.48	66	1	0	1	66	240	175	1e-27	123	hsa-miR-122a
hsa-mir-29a	gnl|ti|860609555	98.46	65	0	1	1	64	605	669	1e-24	113	hsa-miR-29a
mmu-mir-184	gnl|ti|820996191	98.44	64	1	0	6	69	416	353	2e-26	119	hsa-miR-184
mmu-mir-125a	gnl|ti|1577748930	98.44	64	1	0	5	68	343	406	3e-26	119	hsa-miR-125a
rno-mir-32	gnl|ti|812745366	98.44	64	1	0	4	67	157	220	2e-26	119	hsa-miR-32
mmu-mir-15b	gnl|ti|2020963538	98.44	64	1	0	1	64	743	680	3e-26	119	hsa-miR-15b
mmu-mir-136	gnl|ti|848311590	98.39	62	1	0	1	62	138	77	3e-25	115	hsa-miR-136
hsa-mir-1-1	gnl|ti|2020135326	98.36	61	1	0	7	67	137	77	2e-24	113	hsa-miR-1
hsa-mir-26b	gnl|ti|2023990736	98.28	58	1	0	20	77	25	82	1e-22	107	hsa-miR-26b
hsa-mir-204	gnl|ti|780988088	98.18	110	1	1	1	110	315	207	7e-49	194	hsa-miR-204
hsa-mir-196a-2	gnl|ti|788171134	98.18	110	2	0	1	110	253	362	3e-51	202	hsa-miR-196a
rno-mir-204	gnl|ti|780988088	98.18	110	1	1	1	110	315	207	7e-49	194	hsa-miR-204
mmu-mir-199b	gnl|ti|2019854499	98.17	109	2	0	2	110	498	390	2e-50	200	hsa-miR-199a*
hsa-mir-365-2	gnl|ti|858826997	98.15	108	2	0	4	111	428	321	5e-50	198	hsa-miR-365
rno-mir-214	gnl|ti|774493898	98.15	108	2	0	3	110	193	300	5e-50	198	hsa-miR-214
hsa-mir-216	gnl|ti|855841105	98.1	105	2	0	1	105	144	40	3e-48	192	hsa-miR-216
mmu-mir-365-2	gnl|ti|858826997	98	100	2	0	11	110	421	322	3e-45	182	hsa-miR-365
rno-mir-221	gnl|ti|1666208333	97.98	99	1	1	6	104	716	813	4e-42	172	hsa-miR-221
rno-let-7d	gnl|ti|1380820092	97.96	98	2	0	1	98	263	360	5e-44	178	hsa-let-7d
hsa-mir-15b	gnl|ti|2020963412	97.96	98	2	0	1	98	392	489	5e-44	178	hsa-miR-15b
mmu-mir-7-1	gnl|ti|860614164	97.96	98	2	0	2	99	261	164	4e-44	178	rno-miR-7
rno-mir-219-2	gnl|ti|2020443958	97.92	96	2	0	1	96	369	274	8e-43	174	hsa-miR-219
mmu-mir-759	gnl|ti|1417296751	97.92	96	2	0	1	96	794	699	1e-42	174	PREDICTED_MIR181
hsa-mir-619	gnl|ti|2025228840	97.92	48	1	0	3	50	187	234	2e-16	87.7	hsa-miR-619
mmu-mir-221	gnl|ti|1666208333	97.89	95	1	1	1	95	716	809	8e-40	165	hsa-miR-221
rno-mir-16	gnl|ti|2020963538	97.89	95	2	0	1	95	611	517	3e-42	172	hsa-miR-16
hsa-mir-628	gnl|ti|1577674611	97.89	95	2	0	1	95	245	339	4e-42	172	hsa-miR-628
rno-mir-325	gnl|ti|769856460	97.87	94	2	0	5	98	335	242	1e-41	170	rno-miR-325
mmu-mir-325	gnl|ti|769856460	97.87	94	2	0	5	98	335	242	1e-41	170	rno-miR-325
hsa-mir-423	gnl|ti|470927342	97.87	94	2	0	1	94	304	397	1e-41	170	hsa-miR-423
mmu-mir-340	gnl|ti|1071491237	97.87	94	2	0	5	98	809	716	1e-41	170	hsa-miR-340
hsa-mir-181c	gnl|ti|851416912	97.85	93	2	0	13	105	190	282	5e-41	168	hsa-miR-181c
mmu-mir-448	gnl|ti|1071517399	97.85	93	2	0	5	97	176	268	6e-41	168	hsa-miR-448
rno-mir-101b	gnl|ti|2024281437	97.83	92	2	0	6	97	450	541	2e-40	167	rno-miR-101b
hsa-mir-335	gnl|ti|1420538927	97.83	92	2	0	3	94	90	181	2e-40	167	hsa-miR-335
hsa-mir-129-2	gnl|ti|311625830	97.78	90	2	0	1	90	652	563	3e-39	163	rno-miR-129
mmu-mir-129-2	gnl|ti|311625830	97.78	90	2	0	1	90	652	563	3e-39	163	rno-miR-129
hsa-mir-544	gnl|ti|860614762	97.75	89	2	0	1	89	483	571	8e-39	161	hsa-miR-544
rno-mir-200a	gnl|ti|1420642876	97.75	89	2	0	1	89	656	568	1e-38	161	hsa-miR-200a
mmu-mir-200a	gnl|ti|1420642876	97.75	89	2	0	1	89	656	568	1e-38	161	hsa-miR-200a
rno-mir-135b	gnl|ti|1420269080	97.75	89	2	0	2	90	176	264	2e-38	161	hsa-miR-135b
mmu-mir-615	gnl|ti|2024737808	97.73	88	2	0	1	88	172	259	5e-38	159	hsa-miR-615
rno-mir-145	gnl|ti|470944139	97.73	88	2	0	1	88	175	262	4e-38	159	hsa-miR-145
rno-mir-125b-1	gnl|ti|1420730003	97.7	87	2	0	1	87	136	50	2e-37	157	hsa-miR-125b
rno-mir-340	gnl|ti|1071491237	97.7	87	2	0	12	98	802	716	2e-37	157	hsa-miR-340
mmu-mir-324	gnl|ti|1420583191	97.7	87	2	0	3	89	399	485	2e-37	157	hsa-miR-324-3p
mmu-mir-29a	gnl|ti|860609555	97.7	87	1	1	3	88	595	681	3e-35	149	hsa-miR-29a
rno-mir-29a	gnl|ti|860609555	97.7	87	1	1	3	88	595	681	3e-35	149	hsa-miR-29a
hsa-mir-188	gnl|ti|1666211099	97.67	86	2	0	1	86	679	764	6e-37	155	hsa-miR-188
hsa-mir-346	gnl|ti|860276092	97.67	86	2	0	1	86	598	513	5e-37	155	hsa-miR-346
mmu-mir-103-2	gnl|ti|2022952882	97.65	85	2	0	2	86	707	623	3e-36	153	hsa-miR-103
hsa-mir-122a	gnl|ti|757419560	97.65	85	2	0	1	85	287	371	2e-36	153	hsa-miR-122a
mmu-mir-491	gnl|ti|1581204943	97.65	85	2	0	1	85	449	365	3e-36	153	hsa-miR-491
rno-mir-103-2	gnl|ti|2022952882	97.65	85	2	0	2	86	707	623	3e-36	153	hsa-miR-103
rno-mir-25	gnl|ti|1420207354	97.62	84	2	0	1	84	355	438	1e-35	151	hsa-miR-25
hsa-mir-92b	gnl|ti|854112371	97.62	84	2	0	1	84	410	327	9e-36	151	PREDICTED_MIR30
hsa-mir-505	gnl|ti|1145804972	97.62	84	2	0	1	84	755	672	1e-35	151	hsa-miR-505
rno-mir-324	gnl|ti|1420583191	97.59	83	2	0	1	83	399	481	5e-35	149	hsa-miR-324-3p
hsa-mir-488	gnl|ti|2024307784	97.59	83	2	0	1	83	105	187	4e-35	149	hsa-miR-488
mmu-mir-338	gnl|ti|810766141	97.56	41	0	1	59	98	14	54	4e-10	65.9	hsa-miR-338
rno-mir-19a	gnl|ti|854114589	97.56	82	2	0	1	82	258	339	1e-34	147	hsa-miR-19a
rno-mir-224	gnl|ti|781152417	97.56	82	1	1	1	82	387	307	3e-32	139	hsa-miR-224
rno-mir-30c-1	gnl|ti|2024412056	97.53	81	2	0	9	89	223	303	7e-34	145	hsa-miR-30c
mmu-mir-542	gnl|ti|2022448421	97.53	81	2	0	5	85	47	127	6e-34	145	hsa-miR-542-3p
mmu-mir-30c-1	gnl|ti|2024412056	97.53	81	2	0	9	89	223	303	7e-34	145	hsa-miR-30c
rno-mir-185	gnl|ti|1575367821	97.53	81	1	1	1	80	272	192	2e-31	137	hsa-miR-185
rno-mir-99a	gnl|ti|2020960585	97.53	81	2	0	1	81	258	338	6e-34	145	hsa-miR-99a
hsa-mir-106a	gnl|ti|810890216	97.53	81	2	0	1	81	618	698	4e-34	145	hsa-miR-106a
hsa-mir-500	gnl|ti|1666211003	97.5	80	2	0	5	84	418	339	2e-33	143	hsa-miR-500
mmu-mir-30c-2	gnl|ti|854287390	97.5	80	2	0	5	84	136	215	2e-33	143	hsa-miR-30c
rno-mir-125a	gnl|ti|1577748930	97.47	79	2	0	1	79	330	408	1e-32	141	hsa-miR-125a
rno-mir-542	gnl|ti|2022448421	97.44	78	2	0	2	79	47	124	4e-32	139	hsa-miR-542-3p
hsa-mir-93	gnl|ti|1420207354	97.4	77	2	0	1	77	154	230	2e-31	137	rno-miR-93
hsa-mir-671	gnl|ti|860292893	97.39	115	3	0	4	118	214	328	8e-52	204	mmu-miR-671
rno-mir-320	gnl|ti|2027985691	97.33	75	2	0	2	76	420	346	2e-30	133	hsa-miR-320
rno-mir-212	gnl|ti|854707499	97.33	75	2	0	12	86	107	33	2e-30	133	hsa-miR-212
hsa-mir-638	gnl|ti|847964743	97.3	37	1	0	64	100	343	307	4e-10	65.9	hsa-miR-638
rno-mir-383	gnl|ti|812827876	97.3	74	2	0	1	74	541	614	6e-30	131	mmu-miR-383
rno-mir-130b	gnl|ti|2025919304	97.26	73	2	0	10	82	416	488	4e-29	129	hsa-miR-130b
mmu-mir-138-1	gnl|ti|532164048	97.26	73	2	0	16	88	414	342	4e-29	129	hsa-miR-138
mmu-mir-129-1	gnl|ti|159494101	97.26	73	1	1	1	72	549	621	6e-27	121	rno-miR-129
hsa-mir-494	gnl|ti|808291752	97.26	73	1	1	1	73	47	118	6e-27	121	hsa-miR-494
hsa-mir-374	gnl|ti|781224800	97.22	72	2	0	1	72	251	180	9e-29	127	hsa-miR-374
hsa-let-7a-2	gnl|ti|2030669154	97.22	72	2	0	1	72	732	661	1e-28	127	hsa-let-7a
rno-mir-322	gnl|ti|1420804291	97.22	36	1	0	7	42	67	102	3e-09	63.9	rno-miR-424
hsa-mir-10b	gnl|ti|2022730406	97.2	107	3	0	4	110	578	472	6e-47	188	hsa-miR-10b
hsa-mir-27a	gnl|ti|774093201	97.18	71	1	1	5	75	510	579	1e-25	117	hsa-miR-27a
mmu-mir-672	gnl|ti|1420391258	97.14	35	1	0	55	89	67	101	1e-08	61.9	mmu-miR-672
hsa-mir-23a	gnl|ti|774093201	97.14	70	2	0	4	73	325	394	1e-27	123	hsa-miR-23a
mmu-mir-31	gnl|ti|130807175	97.14	105	3	0	1	105	172	68	7e-46	184	hsa-miR-31
mmu-mir-383	gnl|ti|812827876	97.14	70	2	0	1	70	543	612	1e-27	123	mmu-miR-383
hsa-mir-31	gnl|ti|130807175	97.14	70	2	0	1	70	152	83	1e-27	123	hsa-miR-31
mmu-mir-145	gnl|ti|470944139	97.14	70	2	0	1	70	184	253	2e-27	123	hsa-miR-145
rno-mir-31	gnl|ti|130807175	97.14	105	3	0	1	105	172	68	7e-46	184	hsa-miR-31
rno-mir-448	gnl|ti|1071517399	97.12	104	3	0	2	105	173	276	4e-45	182	hsa-miR-448
hsa-mir-139	gnl|ti|853262266	97.1	69	1	1	1	68	207	139	1e-24	113	hsa-miR-139
rno-mir-129-1	gnl|ti|159494101	97.1	69	1	1	5	72	553	621	1e-24	113	rno-miR-129
rno-mir-139	gnl|ti|853262266	97.1	69	1	1	1	68	207	139	1e-24	113	hsa-miR-139
mmu-mir-139	gnl|ti|853262266	97.1	69	1	1	1	68	207	139	1e-24	113	hsa-miR-139
hsa-mir-448	gnl|ti|1071517399	97.06	102	2	1	4	104	175	276	1e-41	170	hsa-miR-448
mmu-mir-146b	gnl|ti|774459385	97.06	102	3	0	3	104	391	290	5e-44	178	hsa-miR-146b
mmu-mir-188	gnl|ti|1420194163	97.06	68	2	0	1	68	598	531	3e-26	119	hsa-miR-188
hsa-mir-181a-1	gnl|ti|2031884044	97.03	101	3	0	1	101	807	707	3e-44	176	hsa-miR-181a
hsa-mir-187	gnl|ti|2010670212	97	100	3	0	6	105	635	734	8e-43	174	hsa-miR-187
mmu-mir-378	gnl|ti|1071482348	96.97	66	2	0	1	66	196	261	4e-25	115	hsa-miR-378
mmu-mir-210	gnl|ti|1380786626	96.97	99	3	0	9	107	83	181	3e-42	172	hsa-miR-210
hsa-mir-378	gnl|ti|1071482348	96.97	66	2	0	1	66	196	261	4e-25	115	hsa-miR-378
mmu-mir-99a	gnl|ti|2020960585	96.92	65	2	0	1	65	266	330	2e-24	113	hsa-miR-99a
rno-mir-378	gnl|ti|1071482348	96.92	65	2	0	1	65	197	261	2e-24	113	hsa-miR-378
rno-mir-33	gnl|ti|1420295260	96.92	65	2	0	3	67	252	188	2e-24	113	hsa-miR-33
mmu-mir-23a	gnl|ti|774093201	96.88	64	2	0	5	68	325	388	6e-24	111	hsa-miR-23a
rno-mir-23a	gnl|ti|774093201	96.88	64	2	0	5	68	325	388	6e-24	111	hsa-miR-23a
hsa-mir-223	gnl|ti|2021541068	96.84	95	3	0	9	103	144	238	9e-40	165	hsa-miR-223
hsa-mir-135b	gnl|ti|1420269080	96.84	95	3	0	3	97	177	271	1e-39	165	hsa-miR-135b
mmu-mir-26b	gnl|ti|2023990736	96.83	63	1	1	23	85	25	86	8e-21	101	hsa-miR-26b
rno-mir-26b	gnl|ti|2023990736	96.83	63	1	1	23	85	25	86	8e-21	101	hsa-miR-26b
rno-mir-7-1	gnl|ti|860614164	96.81	94	3	0	1	94	257	164	2e-39	163	rno-miR-7
rno-mir-140	gnl|ti|1890332032	96.81	94	3	0	6	99	649	556	3e-39	163	rno-miR-140*
hsa-mir-640	gnl|ti|311853806	96.77	31	1	0	35	65	541	571	2e-06	54	hsa-miR-640
hsa-mir-191	gnl|ti|2025394035	96.74	92	3	0	1	92	217	126	5e-38	159	hsa-miR-191
mmu-mir-100	gnl|ti|808216925	96.72	61	2	0	16	76	467	527	4e-22	105	hsa-miR-100
mmu-mir-16-2	gnl|ti|2020963538	96.7	91	3	0	5	95	607	517	2e-37	157	hsa-miR-16
hsa-mir-326	gnl|ti|810964441	96.7	91	3	0	5	95	323	233	1e-37	157	hsa-miR-326
hsa-mir-599	gnl|ti|813701687	96.7	91	3	0	1	91	43	133	1e-37	157	hsa-miR-599
rno-mir-181a-1	gnl|ti|2031884044	96.67	90	3	0	1	90	798	709	8e-38	155	hsa-miR-181a
hsa-mir-584	gnl|ti|810843714	96.67	30	1	0	21	50	575	546	6e-06	52	hsa-miR-584
mmu-mir-505	gnl|ti|1145804972	96.67	90	3	0	1	90	760	671	7e-37	155	mmu-miR-505
hsa-mir-181a-2	gnl|ti|2027995419	96.67	90	3	0	21	110	220	131	9e-37	155	hsa-miR-181a
mmu-mir-135b	gnl|ti|1420269080	96.63	89	3	0	2	90	176	264	4e-36	153	hsa-miR-135b
mmu-mir-133a-2	gnl|ti|812450209	96.63	89	3	0	6	94	69	157	2e-36	153	hsa-miR-133a
hsa-mir-30c-1	gnl|ti|2024412056	96.63	89	3	0	1	89	215	303	3e-36	153	hsa-miR-30c
rno-mir-96	gnl|ti|489060073	96.59	88	3	0	6	93	230	317	1e-35	151	hsa-miR-96
rno-mir-7-2	gnl|ti|860614164	96.55	29	1	0	14	42	244	216	2e-05	50.1	rno-miR-7
mmu-mir-709	gnl|ti|1674938574	96.55	29	1	0	60	88	152	180	3e-05	50.1	mmu-miR-709
hsa-mir-425	gnl|ti|1382485284	96.55	87	3	0	1	87	541	627	3e-35	149	hsa-miR-425
mmu-mir-187	gnl|ti|2010670212	96.55	58	2	0	4	61	664	721	2e-20	99.6	hsa-miR-187
hsa-mir-576	gnl|ti|861236742	96.55	29	1	0	52	80	313	341	2e-05	50.1	hsa-miR-576
hsa-mir-28	gnl|ti|345122395	96.51	86	3	0	1	86	101	186	1e-34	147	hsa-miR-28
hsa-mir-10a	gnl|ti|2022730406	96.43	28	1	0	18	45	559	532	0.0001	48.1	hsa-miR-10a
hsa-mir-380	gnl|ti|851617668	96.43	56	2	0	1	56	524	579	3e-19	95.6	hsa-miR-380-5p
mmu-mir-27a	gnl|ti|774093201	96.43	84	1	2	1	84	502	583	1e-28	127	hsa-miR-27a
hsa-mir-18b	gnl|ti|810564889	96.43	56	1	1	1	56	788	842	7e-17	87.7	hsa-miR-18b
mmu-mir-10a	gnl|ti|2022730406	96.43	28	1	0	18	45	559	532	0.0001	48.1	hsa-miR-10a
rno-mir-10a	gnl|ti|2022730406	96.43	28	1	0	18	45	559	532	0.0001	48.1	hsa-miR-10a
mmu-mir-15a	gnl|ti|1579971821	96.43	84	2	1	2	84	430	347	7e-31	135	hsa-miR-15a
rno-mir-128b	gnl|ti|2022017150	96.43	84	3	0	1	84	574	657	2e-33	143	hsa-miR-128b
hsa-mir-128b	gnl|ti|2022017150	96.43	84	3	0	1	84	574	657	2e-33	143	hsa-miR-128b
hsa-mir-497	gnl|ti|1420605857	96.43	112	4	0	1	112	446	335	5e-48	192	hsa-miR-497
hsa-mir-585	gnl|ti|1417231537	96.43	28	1	0	67	94	702	729	0.0002	48.1	hsa-miR-585
hsa-mir-661	gnl|ti|1253516088	96.43	28	1	0	15	42	904	877	0.0001	48.1	hsa-miR-661
mmu-mir-19b-1	gnl|ti|1579909838	96.39	83	3	0	1	83	107	189	1e-32	141	hsa-miR-19b
rno-mir-19b-1	gnl|ti|1579909838	96.39	83	3	0	1	83	107	189	1e-32	141	hsa-miR-19b
rno-mir-186	gnl|ti|811041261	96.34	82	3	0	1	82	436	517	3e-32	139	hsa-miR-186
hsa-mir-186	gnl|ti|811041261	96.34	82	3	0	1	82	436	517	3e-32	139	hsa-miR-186
hsa-mir-224	gnl|ti|781152417	96.3	81	3	0	1	81	387	307	1e-31	137	hsa-miR-224
rno-mir-540	gnl|ti|1578181027	96.3	27	1	0	2	28	586	560	0.0005	46.1	mmu-miR-540
hsa-let-7a-3	gnl|ti|858853882	96.3	27	1	0	47	73	454	428	0.0003	46.1	hsa-let-7a
hsa-mir-130a	gnl|ti|1420237525	96.3	81	3	0	1	81	703	623	2e-31	137	hsa-miR-130a
mmu-mir-470	gnl|ti|860434229	96.3	27	1	0	39	65	764	790	0.0003	46.1	mmu-miR-470
hsa-mir-181b-1	gnl|ti|2031884044	96.3	108	4	0	1	108	646	539	4e-46	182	hsa-miR-181b
hsa-mir-557	gnl|ti|1574276906	96.3	27	1	0	29	55	803	829	0.0006	46.1	hsa-miR-557
mmu-mir-680-3	gnl|ti|1420392264	96.3	27	1	0	1	27	1193	1219	0.0006	46.1	mmu-miR-680
hsa-mir-217	gnl|ti|857204980	96.26	107	4	0	4	110	164	270	1e-44	180	hsa-miR-217
rno-mir-187	gnl|ti|2010670212	96.25	80	3	0	25	104	659	738	7e-31	135	hsa-miR-187
hsa-mir-545	gnl|ti|1145871287	96.23	106	4	0	1	106	872	767	6e-44	178	hsa-miR-545
hsa-mir-219-1	gnl|ti|237136325	96.23	106	4	0	1	106	441	546	6e-44	178	hsa-miR-219
mmu-mir-652	gnl|ti|848594432	96.2	79	3	0	8	86	215	293	2e-30	133	hsa-miR-652
mmu-mir-194-2	gnl|ti|2023458960	96.15	78	3	0	2	79	614	537	9e-30	131	hsa-miR-194
rno-mir-194-2	gnl|ti|2023458960	96.15	78	3	0	1	78	614	537	9e-30	131	hsa-miR-194
hsa-mir-133b	gnl|ti|1579262160	96.15	104	4	0	15	118	178	75	1e-42	174	hsa-miR-133b
hsa-mir-34c	gnl|ti|767575194	96.1	77	3	0	1	77	129	205	3e-29	129	hsa-miR-34c
hsa-mir-221	gnl|ti|1666208333	96.08	102	3	1	5	106	715	815	4e-39	163	hsa-miR-221
mmu-mir-128b	gnl|ti|2022017150	96.05	76	3	0	1	76	578	653	1e-28	127	hsa-miR-128b
hsa-mir-7-3	gnl|ti|1420954752	96.05	76	3	0	7	82	802	877	2e-28	127	rno-miR-7
hsa-mir-194-2	gnl|ti|2023458960	96.05	76	3	0	10	85	605	530	1e-28	127	hsa-miR-194
rno-mir-192	gnl|ti|2023458960	96.04	101	4	0	10	110	413	313	6e-41	168	hsa-miR-192
rno-mir-210	gnl|ti|1380786626	95.96	99	4	0	9	107	83	181	8e-40	165	hsa-miR-210
rno-mir-223	gnl|ti|2021541068	95.95	74	3	0	20	93	155	228	3e-27	123	hsa-miR-223
hsa-mir-582	gnl|ti|2024174210	95.92	98	4	0	1	98	666	569	3e-39	163	hsa-miR-582
mmu-mir-671	gnl|ti|860292893	95.92	98	4	0	1	98	221	318	2e-39	163	mmu-miR-671
hsa-mir-206	gnl|ti|1579262048	95.89	73	3	0	1	73	453	381	1e-26	121	hsa-miR-206
mmu-mir-130b	gnl|ti|2025919304	95.89	73	3	0	10	82	416	488	9e-27	121	hsa-miR-130b
hsa-mir-325	gnl|ti|842589572	95.88	97	4	0	2	98	300	396	9e-39	161	hsa-miR-325
hsa-mir-24-2	gnl|ti|857719464	95.83	72	3	0	1	72	349	278	2e-26	119	hsa-miR-24
mmu-mir-670	gnl|ti|1420223518	95.83	72	3	0	16	87	158	229	5e-26	119	mmu-miR-670
mmu-let-7a-2	gnl|ti|2030669154	95.83	96	4	0	1	96	744	649	5e-38	159	hsa-let-7a
hsa-mir-499	gnl|ti|815434076	95.8	119	5	0	4	122	97	215	2e-49	196	hsa-miR-499
mmu-mir-1-2	gnl|ti|1071489049	95.77	71	3	0	1	71	457	387	1e-25	117	hsa-miR-1
mmu-mir-186	gnl|ti|811041261	95.77	71	3	0	1	71	444	514	8e-26	117	hsa-miR-186
hsa-mir-205	gnl|ti|810440256	95.74	94	4	0	17	110	136	229	6e-37	155	hsa-miR-205
mmu-mir-212	gnl|ti|854707499	95.71	70	3	0	1	70	102	33	4e-25	115	hsa-miR-212
hsa-mir-196a-1	gnl|ti|1420398970	95.71	70	3	0	1	70	284	215	5e-25	115	hsa-miR-196a
mmu-let-7e	gnl|ti|1577748346	95.7	93	4	0	1	93	518	610	4e-36	153	hsa-let-7e
rno-let-7e	gnl|ti|1577748346	95.7	93	4	0	1	93	518	610	4e-36	153	hsa-let-7e
hsa-mir-496	gnl|ti|1420967687	95.7	93	4	0	10	102	76	168	4e-36	153	hsa-miR-496
hsa-mir-490	gnl|ti|858864466	95.69	116	5	0	11	126	254	139	1e-47	190	hsa-miR-490
mmu-mir-205	gnl|ti|810711243	95.65	69	2	1	1	68	417	349	3e-22	105	hsa-miR-205
mmu-mir-16-1	gnl|ti|1579971821	95.6	91	4	0	1	91	292	202	6e-35	149	hsa-miR-16
hsa-mir-555	gnl|ti|848072209	95.59	68	3	0	1	68	184	251	8e-24	111	hsa-miR-555
rno-mir-184	gnl|ti|820996191	95.59	68	3	0	7	74	417	350	6e-24	111	hsa-miR-184
hsa-mir-302c	gnl|ti|854155477	95.59	68	3	0	1	68	404	337	5e-24	111	hsa-miR-302c*
rno-mir-181a-2	gnl|ti|2027995419	95.56	45	2	0	25	69	216	172	3e-12	73.8	hsa-miR-181a
hsa-mir-138-1	gnl|ti|532164048	95.56	90	4	0	10	99	420	331	2e-34	147	hsa-miR-138
mmu-mir-33	gnl|ti|1420295260	95.52	67	3	0	1	67	254	188	3e-23	109	hsa-miR-33
hsa-mir-574	gnl|ti|823803079	95.45	44	2	0	50	93	332	289	7e-12	71.9	hsa-miR-574
hsa-mir-133a-2	gnl|ti|1377348660	95.4	87	4	0	9	95	301	387	9e-33	141	hsa-miR-133a
mmu-mir-684-1	gnl|ti|2020359627	95.35	86	2	2	1	85	666	750	2e-27	123	mmu-miR-684
mmu-mir-192	gnl|ti|2023458960	95.29	85	4	0	2	86	411	327	2e-31	137	hsa-miR-192
mmu-mir-17	gnl|ti|1579909832	95.29	85	3	1	1	84	458	374	5e-29	129	hsa-miR-17-5p
hsa-mir-301	gnl|ti|860259687	95.29	85	4	0	1	85	682	598	1e-31	137	hsa-miR-301
hsa-mir-345	gnl|ti|767109668	95.29	85	3	1	2	86	702	619	4e-29	129	hsa-miR-345
mmu-mir-484	gnl|ti|861079780	95.24	42	2	0	1	42	400	359	6e-11	67.9	hsa-miR-484
rno-mir-27a	gnl|ti|774093201	95.24	84	2	2	1	84	502	583	3e-26	119	hsa-miR-27a
mmu-mir-490	gnl|ti|858864466	95.24	84	4	0	1	84	247	164	4e-31	135	hsa-miR-490
rno-mir-222	gnl|ti|1666208440	95.24	84	4	0	10	93	579	496	7e-31	135	hsa-miR-222
hsa-mir-184	gnl|ti|862206074	95.24	84	3	1	1	84	254	336	1e-28	127	hsa-miR-184
mmu-mir-488	gnl|ti|2024307784	95.24	84	4	0	14	97	105	188	8e-31	135	mmu-miR-488
hsa-mir-218-1	gnl|ti|775556504	95.19	104	5	0	7	110	116	219	2e-40	167	hsa-miR-218
rno-mir-208	gnl|ti|2020163214	95.18	83	4	0	1	83	409	327	2e-30	133	hsa-miR-208
mmu-mir-208	gnl|ti|2020163214	95.18	83	4	0	1	83	409	327	2e-30	133	hsa-miR-208
rno-mir-30d	gnl|ti|1008617003	95.16	62	3	0	12	73	377	316	3e-20	99.6	hsa-miR-30d
mmu-mir-30d	gnl|ti|1008617003	95.16	62	3	0	12	73	377	316	3e-20	99.6	hsa-miR-30d
mmu-mir-487b	gnl|ti|851619303	95.12	82	4	0	1	82	336	255	7e-30	131	hsa-miR-487b
hsa-mir-452	gnl|ti|857802751	95.12	82	4	0	1	82	156	237	7e-30	131	hsa-miR-452
rno-mir-100	gnl|ti|808216925	95.08	61	3	0	16	76	467	527	9e-20	97.6	hsa-miR-100
mmu-mir-93	gnl|ti|1420207354	95.06	81	4	0	1	81	150	230	5e-29	129	rno-miR-93
hsa-mir-95	gnl|ti|863198334	95.06	81	4	0	1	81	270	350	3e-29	129	hsa-miR-95
hsa-mir-212	gnl|ti|854707499	95	80	4	0	6	85	112	33	1e-28	127	hsa-miR-212
mmu-mir-322	gnl|ti|1420804291	95	40	2	0	3	42	63	102	3e-09	63.9	rno-miR-424
mmu-mir-148a	gnl|ti|808433769	94.95	99	5	0	1	99	280	378	1e-37	157	hsa-miR-148a
mmu-mir-20a	gnl|ti|854114589	94.9	98	5	0	10	107	418	515	6e-37	155	hsa-miR-20a
rno-mir-92-1	gnl|ti|1579909838	94.87	78	4	0	1	78	229	306	3e-27	123	hsa-miR-92
hsa-mir-542	gnl|ti|2022448421	94.85	97	5	0	1	97	42	138	3e-36	153	hsa-miR-542-3p
rno-mir-333	gnl|ti|1666539957	94.83	58	3	0	36	93	696	753	9e-18	91.7	rno-miR-333
hsa-mir-424	gnl|ti|1420804291	94.81	77	4	0	1	77	73	149	1e-26	121	hsa-miR-424
mmu-mir-1-1	gnl|ti|2020135326	94.81	77	4	0	1	77	146	70	8e-27	121	hsa-miR-1
hsa-mir-572	gnl|ti|808779259	94.74	38	2	0	15	52	118	155	2e-08	60	hsa-miR-572
hsa-mir-562	gnl|ti|811812933	94.74	38	2	0	1	38	258	295	2e-08	60	hsa-miR-562
rno-mir-205	gnl|ti|810711243	94.74	76	3	1	31	105	413	338	8e-24	111	hsa-miR-205
hsa-mir-92-2	gnl|ti|532116430	94.67	75	4	0	1	75	262	336	1e-25	117	hsa-miR-92
rno-mir-34c	gnl|ti|767575194	94.67	75	4	0	1	75	129	203	1e-25	117	hsa-miR-34c
mmu-mir-34c	gnl|ti|767575194	94.67	75	4	0	1	75	129	203	1e-25	117	hsa-miR-34c
hsa-mir-532	gnl|ti|1666211099	94.67	75	3	1	4	78	322	395	4e-23	109	hsa-miR-532
hsa-mir-509	gnl|ti|532144523	94.64	56	3	0	5	60	544	489	1e-16	87.7	hsa-miR-509
hsa-mir-548d-2	gnl|ti|2025222219	94.59	37	2	0	18	54	51	87	1e-07	58	hsa-miR-548d
hsa-mir-34a	gnl|ti|1891929281	94.59	111	5	1	1	110	429	319	8e-40	165	hsa-miR-34a
hsa-mir-548a-3	gnl|ti|2025222219	94.59	37	2	0	51	87	87	51	1e-07	58	hsa-miR-548a
hsa-mir-660	gnl|ti|1666211417	94.57	92	5	0	1	92	148	239	3e-33	143	hsa-miR-660
mmu-mir-101b	gnl|ti|2024281437	94.57	92	5	0	6	97	450	541	3e-33	143	rno-miR-101b
mmu-mir-708	gnl|ti|808224596	94.57	92	5	0	18	109	376	285	2e-33	143	mmu-miR-708
hsa-mir-30e	gnl|ti|2024412080	94.57	92	5	0	1	92	286	195	3e-33	143	hsa-miR-30e-3p
hsa-mir-19b-2	gnl|ti|532116430	94.57	92	5	0	5	96	114	205	3e-33	143	hsa-miR-19b
hsa-mir-218-2	gnl|ti|1420248789	94.55	110	4	2	1	110	872	979	3e-37	157	hsa-miR-218
mmu-mir-686	gnl|ti|470956417	94.5	109	6	0	1	109	285	393	5e-41	168	mmu-miR-686
hsa-mir-151	gnl|ti|2022548348	94.44	90	5	0	1	90	768	679	4e-32	139	hsa-miR-151
hsa-mir-580	gnl|ti|1420316818	94.44	36	2	0	3	38	660	625	7e-07	56	hsa-miR-580
hsa-mir-210	gnl|ti|762182051	94.44	108	6	0	2	109	359	252	2e-40	167	hsa-miR-210
hsa-mir-222	gnl|ti|1666208440	94.39	107	6	0	1	107	595	489	9e-40	165	hsa-miR-222
rno-mir-217	gnl|ti|857204980	94.38	89	5	0	17	105	180	268	1e-31	137	rno-miR-217
rno-mir-335	gnl|ti|1420538927	94.38	89	1	1	1	89	88	172	9e-31	135	hsa-miR-335
mmu-mir-182	gnl|ti|1420093375	94.37	71	4	0	5	75	626	696	4e-23	109	hsa-miR-182*
mmu-mir-96	gnl|ti|489060073	94.32	88	5	0	6	93	230	317	7e-31	135	hsa-miR-96
mmu-mir-219-1	gnl|ti|237136325	94.29	105	6	0	5	109	445	549	1e-38	161	hsa-miR-219
rno-mir-219-1	gnl|ti|237136325	94.29	105	6	0	5	109	445	549	1e-38	161	hsa-miR-219
hsa-mir-432	gnl|ti|848311590	94.25	87	5	0	1	87	346	260	2e-30	133	hsa-miR-432
hsa-mir-33	gnl|ti|1420295260	94.2	69	4	0	1	69	254	186	5e-22	105	hsa-miR-33
hsa-mir-200a	gnl|ti|1420642876	94.19	86	5	0	3	88	654	569	1e-29	131	hsa-miR-200a
mmu-mir-376c	gnl|ti|808306717	94.19	86	5	0	1	86	181	96	7e-30	131	mmu-miR-376c
mmu-mir-181b-2	gnl|ti|2025412733	94.19	86	5	0	2	87	535	620	1e-29	131	hsa-miR-181b
hsa-mir-302b	gnl|ti|774197499	94.12	68	4	0	2	69	389	456	1e-21	103	hsa-miR-302b
hsa-mir-548d-1	gnl|ti|2020207874	94.12	34	2	0	11	44	206	173	8e-06	52	hsa-miR-548d
hsa-mir-367	gnl|ti|780904071	94.12	68	4	0	1	68	527	460	1e-21	103	hsa-miR-367
hsa-mir-616	gnl|ti|1663937920	94.12	34	2	0	53	86	881	848	8e-06	52	hsa-miR-616
rno-mir-218-1	gnl|ti|775556504	94.12	102	6	0	9	110	118	219	7e-37	155	hsa-miR-218
rno-mir-376c	gnl|ti|808306717	94.05	84	5	0	1	84	180	97	1e-28	127	mmu-miR-376c
mmu-mir-216b	gnl|ti|770385722	94.05	84	5	0	2	85	297	214	1e-28	127	mmu-miR-216b
hsa-mir-34b	gnl|ti|857306832	94.05	84	5	0	1	84	504	421	1e-28	127	hsa-miR-34b
hsa-mir-504	gnl|ti|1420348681	93.98	83	5	0	1	83	495	413	2e-28	127	hsa-miR-504
mmu-mir-494	gnl|ti|808291752	93.98	83	4	1	3	85	47	128	1e-25	117	hsa-miR-494
rno-mir-374	gnl|ti|2023889525	93.94	66	4	0	1	66	758	693	2e-20	99.6	PREDICTED_MIR257
hsa-mir-558	gnl|ti|775561361	93.94	33	2	0	56	88	271	303	2e-05	50.1	hsa-miR-558
rno-mir-34a	gnl|ti|1891929281	93.94	99	6	0	4	102	424	326	4e-35	149	hsa-miR-34a
hsa-mir-663	gnl|ti|860249368	93.94	33	2	0	29	61	585	617	2e-05	50.1	hsa-miR-663
rno-mir-494	gnl|ti|808291752	93.9	82	4	1	2	83	47	127	4e-25	115	hsa-miR-494
mmu-mir-135a-1	gnl|ti|808779242	93.9	82	5	0	1	82	105	186	2e-27	123	hsa-miR-135a
rno-mir-487b	gnl|ti|851619303	93.9	82	5	0	1	82	336	255	2e-27	123	hsa-miR-487b
hsa-mir-548a-1	gnl|ti|2020207874	93.88	49	2	1	40	87	151	199	6e-10	65.9	hsa-miR-548a
hsa-mir-503	gnl|ti|1420804291	93.85	65	4	0	1	65	404	468	1e-19	97.6	hsa-miR-503
hsa-mir-16-2	gnl|ti|2020963538	93.83	81	5	0	1	81	604	524	9e-27	121	hsa-miR-16
hsa-mir-130b	gnl|ti|2025919304	93.75	80	5	0	1	80	407	486	3e-26	119	hsa-miR-130b
mmu-mir-466	gnl|ti|1577968402	93.75	32	2	0	11	42	507	538	0.0001	48.1	mmu-miR-466
mmu-mir-92-1	gnl|ti|1579909838	93.75	80	3	1	1	80	229	306	3e-24	113	hsa-miR-92
rno-mir-292	gnl|ti|812454569	93.75	32	2	0	51	82	128	159	8e-05	48.1	mmu-miR-292-3p
mmu-mir-374	gnl|ti|860818904	93.68	95	6	0	1	95	68	162	8e-33	141	PREDICTED_MIR257
rno-mir-376a	gnl|ti|1008637782	93.67	79	5	0	4	82	125	203	1e-25	117	hsa-miR-376a*
mmu-mir-222	gnl|ti|1666208440	93.67	79	5	0	1	79	575	497	1e-25	117	hsa-miR-222
mmu-mir-367	gnl|ti|780904071	93.65	63	4	0	9	71	522	460	1e-18	93.7	hsa-miR-367
rno-mir-218-2	gnl|ti|1420248789	93.64	110	5	2	1	110	872	979	7e-35	149	hsa-miR-218
mmu-mir-218-2	gnl|ti|1420248789	93.64	110	5	2	1	110	872	979	7e-35	149	hsa-miR-218
hsa-mir-146a	gnl|ti|810498654	93.62	94	6	0	4	97	162	255	3e-32	139	hsa-miR-146a
hsa-mir-484	gnl|ti|861079780	93.59	78	5	0	1	78	403	326	4e-25	115	hsa-miR-484
hsa-mir-519d	gnl|ti|2026010529	93.55	31	2	0	20	50	597	567	0.0004	46.1	hsa-miR-519d
rno-mir-17	gnl|ti|1579909832	93.51	77	4	1	1	76	458	382	7e-22	105	hsa-miR-17-5p
rno-mir-30e	gnl|ti|2024412080	93.48	92	6	0	1	92	286	195	7e-31	135	hsa-miR-30e-3p
mmu-mir-30e	gnl|ti|2024412080	93.48	92	6	0	1	92	286	195	7e-31	135	hsa-miR-30e-3p
hsa-mir-194-1	gnl|ti|810838820	93.44	61	4	0	15	75	571	631	2e-17	89.7	hsa-miR-194
mmu-mir-551b	gnl|ti|1420070149	93.44	61	4	0	17	77	814	874	3e-18	93.7	PREDICTED_MIR167
hsa-mir-362	gnl|ti|812321386	93.44	61	4	0	5	65	399	339	2e-17	89.7	hsa-miR-362
hsa-mir-381	gnl|ti|808385353	93.33	75	4	1	1	75	155	82	5e-21	101	hsa-miR-381
mmu-mir-381	gnl|ti|808385353	93.33	75	4	1	1	75	155	82	5e-21	101	hsa-miR-381
mmu-mir-28	gnl|ti|2024757451	93.33	75	5	0	12	86	670	596	3e-23	109	hsa-miR-28
mmu-mir-326	gnl|ti|810964441	93.26	89	6	0	5	93	323	235	3e-29	129	rno-miR-326
hsa-mir-146b	gnl|ti|774459385	93.24	74	4	1	1	73	373	300	2e-20	99.6	hsa-miR-146b
mmu-mir-151	gnl|ti|2022548348	93.22	59	3	1	1	58	765	707	9e-14	77.8	rno-miR-151
hsa-mir-548c	gnl|ti|2020207874	93.18	44	3	0	11	54	206	163	2e-09	63.9	hsa-miR-548c
mmu-mir-301	gnl|ti|860259687	93.15	73	5	0	13	85	670	598	4e-22	105	hsa-miR-301
mmu-mir-34a	gnl|ti|1891929281	93.14	102	7	0	1	102	427	326	2e-34	147	hsa-miR-34a
rno-mir-363	gnl|ti|532116430	93.1	87	6	0	1	87	420	506	6e-28	125	hsa-miR-363*
rno-mir-329	gnl|ti|848888455	93.1	58	4	0	11	68	640	583	5e-16	85.7	rno-miR-329
mmu-mir-329	gnl|ti|848888455	93.1	58	4	0	11	68	640	583	5e-16	85.7	rno-miR-329
hsa-mir-450-2	gnl|ti|2022448421	93.1	87	6	0	14	100	755	841	7e-28	125	hsa-miR-450
mmu-mir-684-2	gnl|ti|2031706581	93.02	86	6	0	1	86	239	154	2e-27	123	mmu-miR-684
rno-mir-181b-2	gnl|ti|2025412733	93.02	86	6	0	1	86	535	620	2e-27	123	hsa-miR-181b
mmu-let-7g	gnl|ti|784770815	93.02	43	3	0	1	43	741	783	5e-09	61.9	hsa-let-7g
mmu-mir-335	gnl|ti|1420538927	93.02	86	2	1	1	86	88	169	1e-26	121	hsa-miR-335
mmu-mir-218-1	gnl|ti|775556504	93	100	7	0	11	110	120	219	3e-33	143	hsa-miR-218
hsa-mir-501	gnl|ti|1666211148	92.96	71	5	0	7	77	697	627	8e-21	101	hsa-miR-501
mmu-mir-677	gnl|ti|1420605428	92.96	71	5	0	11	81	488	418	1e-20	101	mmu-miR-677
rno-mir-122a	gnl|ti|788143419	92.94	85	6	0	1	85	249	165	6e-27	121	hsa-miR-122a
rno-mir-20a	gnl|ti|854114589	92.94	85	6	0	1	85	420	504	7e-27	121	rno-miR-20a*
hsa-mir-489	gnl|ti|128173911	92.86	84	6	0	1	84	554	471	3e-26	119	hsa-miR-489
rno-mir-34b	gnl|ti|857306832	92.86	84	6	0	1	84	504	421	3e-26	119	rno-miR-34b
hsa-mir-182	gnl|ti|1420093375	92.86	98	7	0	7	104	612	709	7e-32	139	hsa-miR-182*
mmu-mir-34b	gnl|ti|857306832	92.86	84	6	0	1	84	504	421	3e-26	119	rno-miR-34b
mmu-mir-703	gnl|ti|1420318840	92.78	97	4	2	5	99	137	42	1e-17	91.7	mmu-miR-703
hsa-mir-450-1	gnl|ti|1417276944	92.77	83	6	0	9	91	655	573	2e-25	117	hsa-miR-450
mmu-mir-26a-2	gnl|ti|808774478	92.77	83	6	0	1	83	369	287	1e-25	117	hsa-miR-26a
hsa-mir-302a	gnl|ti|854155477	92.75	69	5	0	1	69	225	157	7e-20	97.6	hsa-miR-302a*
hsa-mir-622	gnl|ti|1377713545	92.71	96	7	0	1	96	84	179	5e-31	135	hsa-miR-622
rno-mir-346	gnl|ti|860276092	92.71	96	7	0	1	96	610	515	5e-31	135	rno-miR-346
hsa-mir-195	gnl|ti|1420605857	92.68	82	6	0	6	87	134	53	7e-25	115	hsa-miR-195
hsa-let-7g	gnl|ti|784770815	92.68	41	3	0	1	41	743	783	8e-08	58	hsa-let-7g
mmu-mir-455	gnl|ti|1071509208	92.68	82	5	1	2	82	520	601	1e-22	107	mmu-miR-455-3p
hsa-mir-377	gnl|ti|1420669013	92.65	68	3	2	2	69	1014	949	3e-14	79.8	hsa-miR-377
mmu-mir-376a	gnl|ti|1008637782	92.65	68	5	0	1	68	129	196	4e-19	95.6	hsa-miR-376a*
mmu-mir-330	gnl|ti|1890822188	92.63	95	7	0	4	98	423	329	3e-30	133	rno-miR-330
rno-mir-330	gnl|ti|1890822188	92.63	95	7	0	3	97	423	329	2e-30	133	rno-miR-330
rno-mir-93	gnl|ti|1420207354	92.59	81	5	1	1	80	150	230	7e-22	105	rno-miR-93
rno-let-7a-2	gnl|ti|2030669154	92.55	94	7	0	3	96	742	649	1e-29	131	hsa-let-7a
mmu-mir-217	gnl|ti|857204980	92.47	93	7	0	16	108	177	269	4e-29	129	rno-miR-217
rno-mir-19b-2	gnl|ti|532116430	92.39	92	7	0	5	96	114	205	2e-28	127	hsa-miR-19b
mmu-mir-532	gnl|ti|1666211099	92.31	91	6	1	6	96	323	412	2e-25	117	hsa-miR-532
hsa-mir-155	gnl|ti|768785671	92.31	65	5	0	1	65	394	330	2e-17	89.7	hsa-miR-155
mmu-mir-155	gnl|ti|768785671	92.31	65	5	0	1	65	394	330	2e-17	89.7	mmu-miR-155
hsa-mir-487a	gnl|ti|860469078	92.31	78	6	0	1	78	486	409	9e-23	107	hsa-miR-487a
mmu-mir-196a-1	gnl|ti|1420398970	92.31	91	7	0	10	100	292	202	9e-28	125	hsa-miR-196a
hsa-mir-551b	gnl|ti|1420070149	92.31	78	6	0	6	83	799	876	1e-23	111	PREDICTED_MIR167
mmu-mir-682	gnl|ti|1377713318	92.22	90	7	0	7	96	224	313	2e-27	123	mmu-miR-682
rno-mir-151	gnl|ti|2022548348	92.22	90	6	1	6	94	768	679	7e-25	115	rno-miR-151
rno-mir-345	gnl|ti|767109668	92.21	77	6	0	9	85	695	619	6e-22	105	rno-miR-345
mmu-mir-345	gnl|ti|767109668	92.21	77	6	0	9	85	695	619	6e-22	105	rno-miR-345
hsa-mir-30a	gnl|ti|861580027	92.19	64	5	0	5	68	408	471	7e-17	87.7	hsa-miR-30a-5p
rno-mir-326	gnl|ti|810964441	92.13	89	7	0	5	93	323	235	7e-27	121	rno-miR-326
hsa-mir-449	gnl|ti|774493927	92.13	89	7	0	1	89	235	323	8e-27	121	hsa-miR-449
hsa-mir-384	gnl|ti|311826501	92.05	88	7	0	1	88	482	395	3e-26	119	hsa-miR-384
hsa-mir-197	gnl|ti|2024298168	92	75	6	0	1	75	352	278	7e-21	101	hsa-miR-197
rno-mir-296	gnl|ti|810767945	92	50	4	0	25	74	606	655	8e-11	67.9	hsa-miR-296
mmu-mir-296	gnl|ti|810767945	92	50	4	0	25	74	606	655	8e-11	67.9	hsa-miR-296
hsa-mir-376b	gnl|ti|808306717	92	100	8	0	1	100	190	91	5e-31	135	hsa-miR-376b
hsa-mir-485	gnl|ti|812837921	91.94	62	5	0	7	68	771	710	1e-15	83.8	hsa-miR-485-5p
rno-mir-28	gnl|ti|2024757451	91.89	74	6	0	13	86	669	596	3e-20	99.6	hsa-miR-28
mmu-mir-211	gnl|ti|1574259829	91.86	86	7	0	12	97	853	938	2e-25	117	rno-miR-211
rno-mir-211	gnl|ti|1574259829	91.86	86	7	0	12	97	853	938	2e-25	117	rno-miR-211
hsa-mir-644	gnl|ti|855383342	91.84	49	4	0	10	58	529	481	4e-10	65.9	hsa-miR-644
mmu-mir-302c	gnl|ti|854155477	91.8	61	5	0	5	65	400	340	4e-15	81.8	mmu-miR-302c*
mmu-mir-19b-2	gnl|ti|532116430	91.78	73	6	0	9	81	126	198	1e-19	97.6	hsa-miR-19b
mmu-mir-223	gnl|ti|2021541068	91.75	97	8	0	10	106	145	241	5e-29	129	hsa-miR-223
rno-mir-379	gnl|ti|851621265	91.67	36	3	0	48	83	356	391	8e-05	48.1	hsa-miR-379
hsa-mir-339	gnl|ti|810794926	91.67	36	3	0	1	36	540	505	9e-05	48.1	hsa-miR-339
hsa-mir-328	gnl|ti|1420333139	91.67	60	5	0	14	73	360	419	3e-14	79.8	hsa-miR-328
hsa-mir-215	gnl|ti|787033324	91.57	83	7	0	12	94	382	464	3e-23	109	hsa-miR-215
hsa-mir-181d	gnl|ti|851416912	91.47	129	10	1	6	134	352	479	1e-38	161	hsa-miR-181d
mmu-mir-452	gnl|ti|857802751	91.46	82	7	0	1	82	156	237	1e-22	107	hsa-miR-452
mmu-mir-30b	gnl|ti|1574275341	91.46	82	7	0	11	92	415	496	2e-22	107	hsa-miR-30b
rno-mir-30b	gnl|ti|1574275341	91.46	82	7	0	6	87	415	496	2e-22	107	hsa-miR-30b
mmu-mir-195	gnl|ti|1420605857	91.46	82	7	0	13	94	133	52	2e-22	107	hsa-miR-195
mmu-mir-718	gnl|ti|1420802917	91.43	35	3	0	54	88	467	501	0.0006	46.1	mmu-miR-718
rno-mir-216	gnl|ti|855841105	91.4	93	8	0	9	101	136	44	9e-27	121	hsa-miR-216
hsa-mir-486	gnl|ti|842317591	91.38	58	4	1	8	65	548	492	7e-11	67.9	hsa-miR-486
rno-let-7a-1	gnl|ti|858853882	91.36	81	6	1	5	85	507	428	1e-19	97.6	hsa-let-7a
mmu-let-7a-1	gnl|ti|858853882	91.36	81	6	1	5	85	507	428	1e-19	97.6	hsa-let-7a
rno-mir-195	gnl|ti|1420605857	91.36	81	7	0	7	87	133	53	7e-22	105	hsa-miR-195
hsa-mir-329-1	gnl|ti|848888455	91.25	80	7	0	1	80	639	560	4e-22	105	hsa-miR-329
hsa-mir-492	gnl|ti|1377205528	91.23	114	10	0	3	116	243	356	2e-34	147	hsa-miR-492
mmu-mir-377	gnl|ti|1420669013	91.18	68	4	2	1	68	1014	949	7e-12	71.9	hsa-miR-377
rno-mir-23b	gnl|ti|1420800425	91.18	68	4	2	7	74	893	958	1e-11	71.9	hsa-miR-23b
mmu-mir-691	gnl|ti|855876741	91.11	45	4	0	1	45	249	205	8e-08	58	mmu-miR-691
mmu-mir-380	gnl|ti|851617668	91.07	56	5	0	1	56	524	579	4e-12	71.9	hsa-miR-380-5p
mmu-mir-363	gnl|ti|532116430	91.04	67	6	0	9	75	434	500	4e-16	85.7	hsa-miR-363
hsa-let-7a-1	gnl|ti|858853882	91.03	78	6	1	1	78	504	428	6e-18	91.7	hsa-let-7a
hsa-mir-598	gnl|ti|532145859	91.01	89	8	0	2	90	557	645	2e-24	113	hsa-miR-598
mmu-mir-194-1	gnl|ti|2021630709	90.91	55	4	1	7	60	839	893	5e-09	61.9	hsa-miR-194
rno-mir-328	gnl|ti|1420333139	90.91	66	6	0	8	73	354	419	2e-15	83.8	hsa-miR-328
hsa-mir-23b	gnl|ti|1420800425	90.8	87	5	3	6	92	892	975	7e-16	85.7	hsa-miR-23b
mmu-mir-146	gnl|ti|810498654	90.77	65	6	0	1	65	174	238	4e-15	81.8	hsa-miR-146a
hsa-mir-211	gnl|ti|776566303	90.72	97	9	0	8	104	293	197	9e-27	121	hsa-miR-211
mmu-mir-328	gnl|ti|1420333139	90.7	86	8	0	1	86	334	419	2e-22	107	hsa-miR-328
rno-mir-301	gnl|ti|860259687	90.7	86	8	0	10	95	683	598	1e-22	107	hsa-miR-301
mmu-mir-30a	gnl|ti|861580027	90.63	64	6	0	5	68	408	471	2e-14	79.8	hsa-miR-30a-5p
rno-mir-30a	gnl|ti|861580027	90.63	64	6	0	5	68	408	471	2e-14	79.8	hsa-miR-30a-5p
hsa-mir-569	gnl|ti|757428332	90.63	96	9	0	1	96	513	418	4e-26	119	hsa-miR-569
mmu-mir-449	gnl|ti|774493927	90.59	85	8	0	1	85	235	319	4e-22	105	hsa-miR-449
hsa-mir-220	gnl|ti|1379743354	90.48	105	9	1	7	110	393	289	9e-27	121	hsa-miR-220
hsa-mir-590	gnl|ti|127853367	90.43	94	9	0	1	94	160	67	5e-25	115	hsa-miR-590
mmu-mir-23b	gnl|ti|1420800425	90.32	62	4	2	1	62	899	958	3e-08	60	hsa-miR-23b
mmu-mir-685	gnl|ti|2024417689	90.28	72	7	0	28	99	450	379	2e-16	87.7	mmu-miR-685
mmu-mir-216a	gnl|ti|776539247	90.28	72	7	0	1	72	543	614	8e-17	87.7	hsa-miR-216
hsa-mir-329-2	gnl|ti|848888455	90.24	82	8	0	1	82	641	560	6e-21	101	hsa-miR-329
hsa-mir-100	gnl|ti|808216925	90.16	61	6	0	16	76	467	527	1e-12	73.8	hsa-miR-100
rno-mir-130a	gnl|ti|1420237525	90.12	81	8	0	1	81	703	623	2e-19	97.6	hsa-miR-130a
mmu-mir-486	gnl|ti|842317591	90.11	91	8	1	19	109	568	479	3e-21	103	hsa-miR-486
hsa-mir-566	gnl|ti|2028231204	90	90	9	0	5	94	58	147	2e-22	107	hsa-miR-566
hsa-mir-296	gnl|ti|810767945	90	50	5	0	26	75	606	655	2e-08	60	hsa-miR-296
mmu-mir-719	gnl|ti|848199614	90	100	10	0	3	102	435	336	4e-26	119	mmu-miR-719
hsa-mir-631	gnl|ti|1379958601	90	60	6	0	3	62	343	284	5e-12	71.9	hsa-miR-631
mmu-mir-92-2	gnl|ti|532116430	89.86	69	7	0	17	85	271	339	8e-15	81.8	hsa-miR-92
rno-mir-215	gnl|ti|787033324	89.66	87	8	1	1	86	384	470	2e-18	93.7	mmu-miR-215
hsa-mir-199a-1	gnl|ti|2019854499	89.55	67	5	1	5	71	475	411	6e-12	71.9	hsa-miR-199a*
rno-mir-146	gnl|ti|810498654	89.47	95	10	0	1	95	163	257	3e-23	109	hsa-miR-146a
hsa-mir-632	gnl|ti|2025042743	89.41	85	9	0	10	94	244	160	1e-19	97.6	hsa-miR-632
rno-mir-449	gnl|ti|774493927	89.41	85	9	0	1	85	235	319	1e-19	97.6	hsa-miR-449
mmu-mir-692-2	gnl|ti|1377715775	89.36	47	5	0	47	93	408	454	2e-06	54	mmu-miR-692
hsa-mir-502	gnl|ti|1666211148	89.29	84	9	0	2	85	703	620	5e-19	95.6	hsa-miR-502
mmu-mir-711	gnl|ti|2027680632	89.13	46	5	0	37	82	231	186	7e-06	52	mmu-miR-711
hsa-mir-650	gnl|ti|2027356375	89.09	55	6	0	41	95	627	573	8e-09	61.9	hsa-miR-650
mmu-mir-130a	gnl|ti|1420237525	89.06	64	6	1	1	63	691	628	2e-09	63.9	hsa-miR-130a
mmu-mir-450b	gnl|ti|854477482	88.75	80	9	0	3	82	185	264	9e-17	87.7	mmu-miR-450b*
hsa-mir-376a-2	gnl|ti|1008637782	88.75	80	9	0	1	80	123	202	1e-16	87.7	hsa-miR-376a
hsa-mir-630	gnl|ti|532166141	88.73	71	8	0	6	76	224	294	1e-13	77.8	hsa-miR-630
mmu-mir-485	gnl|ti|812837921	88.71	62	7	0	7	68	771	710	7e-11	67.9	hsa-miR-485-5p
rno-mir-485	gnl|ti|812837921	88.71	62	7	0	10	71	771	710	8e-11	67.9	hsa-miR-485-5p
mmu-mir-302	gnl|ti|311812912	88.41	69	8	0	1	69	730	662	1e-12	73.8	hsa-miR-302a
mmu-mir-500	gnl|ti|1666211148	88.31	77	8	1	8	84	703	628	2e-12	73.8	mmu-miR-500
hsa-mir-371	gnl|ti|1674489642	88.24	68	7	1	1	67	97	164	2e-09	63.9	hsa-miR-371
rno-mir-24-2	gnl|ti|857719464	88.17	93	9	1	5	95	358	266	8e-18	91.7	hsa-miR-24
mmu-mir-24-2	gnl|ti|857719464	88.17	93	9	1	11	101	352	260	8e-18	91.7	hsa-miR-24
hsa-mir-662	gnl|ti|470929597	88.04	92	11	0	4	95	283	192	5e-19	95.6	hsa-miR-662
mmu-mir-7b	gnl|ti|1420045419	87.8	82	9	1	21	102	799	719	8e-13	75.8	rno-miR-7b
hsa-mir-653	gnl|ti|128173933	87.78	90	8	2	2	90	57	144	1e-13	77.8	PREDICTED_MIR232
rno-mir-503	gnl|ti|1420804291	87.69	65	8	0	1	65	404	468	4e-10	65.9	mmu-miR-503
rno-mir-501	gnl|ti|1420205831	87.5	64	8	0	7	70	508	571	2e-09	63.9	mmu-miR-501*
mmu-mir-302b	gnl|ti|774197499	87.5	72	8	1	3	74	390	460	1e-09	63.9	mmu-miR-302b*
mmu-mir-501	gnl|ti|1420205831	87.5	64	8	0	17	80	508	571	3e-09	63.9	mmu-miR-501*
hsa-mir-513-1	gnl|ti|1417209486	87.5	48	6	0	6	53	299	252	0.0002	48.1	hsa-miR-513
rno-mir-206	gnl|ti|1579262048	87.32	71	9	0	1	71	451	381	4e-11	69.9	hsa-miR-206
rno-mir-376b	gnl|ti|808306717	87.21	86	11	0	1	86	181	96	1e-15	83.8	mmu-miR-376b*
hsa-mir-193b	gnl|ti|490548913	87.01	77	9	1	8	83	535	459	4e-10	65.9	hsa-miR-193b
rno-mir-7b	gnl|ti|1420045419	86.9	84	10	1	22	105	797	715	1e-11	71.9	rno-miR-7b
rno-mir-194-1	gnl|ti|810838820	86.89	61	7	1	15	74	571	631	2e-05	50.1	hsa-miR-194
rno-mir-450	gnl|ti|2022448243	86.79	53	7	0	18	70	28	80	3e-05	50.1	rno-miR-450
mmu-mir-207	gnl|ti|1420343741	86.67	75	10	0	5	79	481	407	3e-11	69.9	mmu-miR-207
mmu-mir-376b	gnl|ti|808306717	86.59	82	11	0	1	82	179	98	3e-13	75.8	mmu-miR-376b*
hsa-mir-548a-2	gnl|ti|2020207874	86.36	88	9	2	8	94	121	206	6e-10	65.9	hsa-miR-548a
mmu-mir-450-1	gnl|ti|2022448421	86.3	73	10	0	17	89	763	835	5e-10	65.9	hsa-miR-450
rno-mir-92-2	gnl|ti|532116430	86.3	73	10	0	17	89	271	343	5e-10	65.9	hsa-miR-92
mmu-mir-215	gnl|ti|2024877662	86.02	93	12	1	17	108	761	853	2e-13	77.8	mmu-miR-215
mmu-mir-206	gnl|ti|1579262048	85.94	64	9	0	3	66	444	381	5e-07	56	hsa-miR-206
hsa-mir-302d	gnl|ti|311812912	85.71	70	5	1	1	65	565	496	2e-08	60	hsa-miR-302d
mmu-mir-342	gnl|ti|1420549284	85.29	68	10	0	22	89	880	947	7e-07	56	hsa-miR-342
hsa-mir-342	gnl|ti|1420549284	85.29	68	10	0	22	89	880	947	7e-07	56	hsa-miR-342
rno-mir-342	gnl|ti|1420549284	85.29	68	10	0	22	89	880	947	7e-07	56	hsa-miR-342
hsa-mir-514-1	gnl|ti|532144523	84.93	73	11	0	12	84	539	467	1e-07	58	hsa-miR-514
hsa-mir-508	gnl|ti|860867313	84.78	92	14	0	5	96	351	442	8e-12	71.9	hsa-miR-508
hsa-mir-154	gnl|ti|1420669012	84.62	78	9	1	1	75	86	163	5e-07	56	hsa-miR-154
mmu-mir-676	gnl|ti|784817405	84.52	84	13	0	6	89	269	186	1e-09	63.9	mmu-miR-676
hsa-mir-514-2	gnl|ti|532144523	83.56	73	12	0	7	79	539	467	3e-05	50.1	hsa-miR-514
hsa-mir-514-3	gnl|ti|532144523	83.56	73	12	0	7	79	539	467	3e-05	50.1	hsa-miR-514
mmu-mir-302d	gnl|ti|311812912	83.33	66	4	1	5	63	561	496	7e-05	48.1	hsa-miR-302d
hsa-mir-658	gnl|ti|851515481	82.29	96	17	0	1	96	61	156	4e-07	56	hsa-miR-658
