# Supplementary material for: Discovery of Porcine microRNAs and Profiling from Skeletal Muscle Tissues during Development
Source: PLoS One. 2008 Sep 16;3(9):e3225. doi: 10.1371/journal.pone.0003225 (PMC2528944; doi:10.1371/journal.pone.0003225)
Supplement: Table S5 — (0.04 MB XLS) [file pone.0003225.s006.xls]

## Sheet: ST5
Supplemental Table 5: Differentially Expressed miRNAs detected by the microarrays
"-": Expression level difference did not reached the significant levels (p<0.001, FDR<0.001)
miRNA	E65/E33	Adu/E65	Adu/E33	Probe Sequence
miR-214	-	0.131512	0.0590058	CTGCCTGTCTGTGCCTGCTGT
miR-422a	6.93369	-	15.0119	GGCCTTCTGACCCTAAGTCCAG
miR-503	-	0.116818	0.0709617	CTGCAGAACTGTTCCCGCTGCTA
miR-497	-	5.79651	11.0887	ACAAACCACAGTGTGCTGCTG
miR-721	-	5.00135	11.073	TTCCCCCTTTTAATTGCACTG
miR-189(mir-24-1)	-	7.78687	10.3697	ACTGATATCAGCTCAGTAGGCAC
miR-378	-	6.24077	11.5757	ACACAGGACCTGGAGTCAGGAG
miR-487a	2.91795	5.34404	15.5937	AACTGGATGTCCCTGTATGATT
miR-680	-	4.97953	14.453	CCCCCATGTCAGCAGATGCCC
miR-127	-	0.0257685	0.0353542	AGCCAAGCTCAGACGGATCCGA
miR-495	-	0.00876663	0.0213131	AAAGAAGTGCACCATGTTTGTTT
miR-411	-	0.011951	0.0350203	ACTGAGGGTTAGTGGACCGTGTT
miR-487b	4.41278	0.0408173	-	AAGTGGATGACCCTGTACGATT
miR-29a	1.92151	16.7801	32.2432	AACCGATTTCAGATGGTGCTA
miR-193b	-	22.4052	22.6788	AAAGCGGGACTTTGAGGGCCAGTT
miR-29b	-	15.4918	32.1892	AACACTGATTTCAAATGGTGCTA
miR-376b	4.59216	0.0182806	0.0839475	AACATGGATTTTCCTCTATGAT
miR-29c	-	17.4391	17.4512	ACCGATTTCAAATGGTGCTA
miR-376a	3.19511	0.0298754	0.0954553	ACGTGGATTTTCCTCTATGAT
miR-335	-	0.0519284	0.0795757	ACATTTTTCGTTATTGCTCTTGA
miR-411	3.27998	0.0264007	0.0865941	CGTACGCTATACGGTCTACTA
miR-532	-	0.0544678	-	ACGGTCCTACACTCAAGGCATG
miR-299-5p	4.73045	0.0548124	-	ATGTATGTGGGACGGTAAACCA
miR-362	-	0.0948282	0.134487	CTCACACCTAGGTTCCAAGGATT
miR-455-3p	-	0.0844663	-	AGTGTATATGCCCGTGGACTGCAT
miR-329	6.35201	0.0303794	0.19297	AAAGAGGTTAACCAGGTGTGTT
miR-486	3.2561	13.4351	43.746	CTCGGGGCAGCTCAGTACAGGA
miR-323	-	0.0604563	0.0896125	AGAGGTCGACCGTGTAATGTGC
miR-660	2.27085	0.0767421	0.17427	CAACTCCGATATGCAATGGGTA
miR-409-3p	-	0.0640232	-	AGGGGTTCACCGAGCAACATTCG
MIR-202	3.7384	0.0348008	0.130099	AGAAGTGCACCGCGAATGTTTC
miR-382	-	0.0313888	0.106294	CGAATCCACCACGAACAACTTC
miR-503	-	0.0897519	0.069554	GCAGTACTGTTCCCGCTGCTA
miR-431	3.89918	0.0389624	0.151921	TGCATGACGGCCTGCAAGACA
miR-410	-	0.0893897	-	AACAGGCCATCTGTGTTATATT
miR-150	-	20.7413	48.3925	CACTGGTACAAGGGTTGGGAGA
miR-380-3p	-	0.0576897	0.187844	AAGATGTGGACCATATTACATA
miR-432	3.69618	0.0734867	-	CCACCCAATGACCTACTCCAAGA
miR-196a	0.0728632	6.10045	-	CCAACAACATGAAACTACCTA
miR-493	4.6241	0.0804618	-	AATGAAAGCCTACCATGTACAA
miR-409-5p	2.35153	0.0789286	0.185603	TGCAAAGTTGCTCGGGTAACCT
miR-379	-	0.0881111	0.205069	TACGTTCCATAGTCTACCA
miR-95	-	13.2274	16.3758	TGCTCAATAAATACCCGTTGAA
miR-369-5p	2.8518	0.05621	0.1603	GCGAATATAACACGGTCGATCT
miR-557	-	30.9687	23.0025	AGACAAGGCCCACCCGTGCAAAC
miR-655	-	0.059769	-	AAAGAGGTTAACCATGTATTAT
miR-656	-	0.0754712	-	AGAGGTTGACTGTATAATATT
miR-182	0.0633568	-	0.133696	TGTGAGTTCTACCATTGCCAAA
miR-376a	4.65253	0.0564233	0.262511	ACGTGGATTTTCCTCTACGAT
miR-365	-	-	14.3879	ATAAGGATTTTTAGGGGCATTA
miR-145	-	5.0246	7.6391	AAGGGATTCCTGGGAAAACTGGAC
miR-331	-	7.46153	7.40622	TTCTAGGATAGGCCCAGGGGC
miR-93	0.165609	-	-	CTACCTGCACGAACAGCACTTTG
miR-140*	0.13942	-	-	TGTCCGTGGTTCTACCCTGTGGTA
miR-93	0.187274	2.09412	0.392173	CTACCTGCACGAACAGCACTTT
miR-542-3p	5.17812	0.180026	-	TTTCAGTTATCAATCTGTCACA
miR-195	-	6.36091	6.94629	GCCAATATTTCTGTGCTGCTA
miR-345	-	5.72207	-	GCCCTGGACTAGGAGTCAGCA
miR-370	-	0.155619	0.204279	CCAGGTTCCACCCCAGCAGGC
miR-30e-3p	-	5.83256	6.04036	GCTGTAAACATCCGACTGAAAG
miR-665	-	0.153867	0.233762	TAAGGGACCTCAGCCTCCTGGT
miR-205	0.125492	5.01641	-	CAGACTCCGGTGGAATGAAGGA
miR-204	-	5.10409	8.07986	AGGCATAGGATGACAAAGGGAA
miR-138	0.119108	-	-	GATTCACAACACCAGCT
miR-299-3p	2.49288	0.128866	0.321249	AAGCGGTTTACCATCCCACATA
miR-340	-	5.48826	6.75353	GGCTATAAAGTAACTGAGACGGA
miR-455	-	0.17297	0.305184	CGATGTAGTCCAAAGGCACATA
miR-485-3p	-	0.158314	0.271977	AGAGGAGAGCCGTGTATGAC
miR-137	0.112899	-	-	CTACGCGTATTCTTAAGCAATA
miR-345	-	5.53779	2.71488	GCACTGGACTAGGGGTCAGCA
miR-183	0.146251	-	-	CAGTGAATTCTACCAGTGCCATA
miR-130a	-	0.248335	0.185789	ATGCCCTTTTAACATTGCACTG
miR-133a*	4.78243	-	8.23364	ATTTGGTTCCATTTTACCAGC
miR-130b	0.406474	0.405364	0.16477	ATGCCCTTTCATCATTGCACTG
miR-18a	0.286112	0.448429	0.128301	TATCTGCACTAGATGCACCTTA
miR-101	-	3.8238	6.33615	CTTCAGTTATCACAGTACTGTA
miR-18b	0.272806	0.420835	0.114806	TAACTGCACTAGATGCACCTTA
miR-218	0.202691	-	0.16203	ACATGGTTAGATCAAGCACAA
miR-223	-	3.91014	9.03997	GGGGTATTTGACAAACTGACA
MIR-220	0.261602	-	0.183134	GCTTTGACAATATCATTGCACT
miR-564	-	4.59547	7.36891	GCCTGCTGACACCGTGCCT
miR-422b(mir-378)	-	-	9.31149	GGCCTTCTGACTCCAAGTCCAG
miR-363	-	-	0.185085	TTACAGATGGATACCGTGCAAT
miR-106a	0.283058	-	0.271884	GCTACCTGCACTGTAAGCACTTTT
miR-199a	-	0.328703	0.260719	GAACAGGTAGTCTGAACACTGGG
miR-22	-	3.9306	4.6303	ACAGTTCTTCAACTGGCAGCTT
miR-16	0.397429	-	-	CGCCAATATTTACGTGCTGCTA
miR-27b	-	2.09356	-	GCAGAACTTAGCCACTGTGAA
miR-20a	0.266116	-	0.33773	CTACCTGCACTATAAGCACTTTA
miR-10a	0.217176	-	-	CACAAATTCGGATCTACAGGGTA
miR-30b	-	2.23003	-	AGCTGAGTGTAGGATGTTTACA
miR-30c	-	2.50197	3.05488	GCTGAGAGTGTAGGATGTTTACA
miR-27a	-	2.27205	-	GCGGAACTTAGCCACTGTGAA
miR-106b	0.445871	-	0.391458	ATCTGCACTGTCAGCACTTTA
miR-20b	0.266384	-	-	CTACCTGCACTATGAGCACTTTG
miR-200a	-	3.43155	-	ACATCGTTACCAGACAGTGTTA
miR-15a	-	3.65529	3.33004	CACAAACCATTATGTGCTGCTA
miR-125a	-	2.50248	2.88269	CACAGGTTAAAGGGTCTCAGGGA
miR-188	-	0.261975	-	ACCCTCCACCATGCAAGGGATG
miR-181d	0.326317	-	0.309571	AACCCACCGACAACAATGAATGTT
miR-28	-	2.91777	-	CTCAATAGACTGTGAGCTCCTT
miR-30e-5p	-	3.42357	2.6455	TCCAGTCAAGGATGTTTACA
miR-423	0.521826	2.26794	-	CTGAGGGGCCTCAGACCGAGCT
miR-638	-	3.43201	3.21942	AGGCCGCCACCCGCCCGCGATCCCT
MIR-144	3.63522	0.20241	-	ATCCTTGAATAGGTGTGTTGCA
miR-200b	0.32113	4.90914	-	GTCATCATTACCAGGCAGTATTA
miR-148b	-	2.29	-	ACAAAGTTCTGTGATGCACTGA
miR-652	-	4.48201	3.7777	TGCACAACCCTAGTGGCGCCATT
miR-30a-3p	-	3.61833	4.16088	GCTGCAAACATCCGACTGAAAG
miR-140	-	2.7892	-	CTACCATAGGGTAAAACCACT
miR-377	3.23155	0.213176	-	ACAAAAGTTGCCTTTGTGTGAT
miR-186	-	2.22107	-	AAGCCCAAAAGGAGAATTCTTTG
miR-491	-	4.82558	4.21762	TCCTCATGGAAGGGTTCCCCACT
miR-352	-	2.21468	-	TACTATGCAACCTACTACTCT
miR-7	0.363186	3.21436	-	CAACAAAATCACTAGTCTTCCA
miR-505	-	3.62721	-	GAGGAAACCAGCAAGTGTTGAC
miR-705	-	3.03363	3.99425	TGCCCACCCCACCTCCCACC
MIR-189	0.45555	4.39851	-	CAGCAGGGCTCCCTCACCAGCA
miR-155	3.86486	-	4.60255	CCCCTATCACAATTAGCATTAA
miR-149	-	3.02712	-	GGAGTGAAGACACGGAGCCAGA
miR-425	-	4.24189	3.33844	GGCGGACACGACATTCCCGAT
miR-493-3p	3.94274	0.208081	-	CTGGCACACAGTAGACCTTCA
MIR-206	-	2.94924	2.74387	TGCCTCCCACACACAGCTTTAA
miR-155	2.3569	-	3.08059	CCCCTATCACGATTAGCATTAA
MIR-207	-	2.44093	2.89145	TTCCCCGGCACCAGCACAAAGT
miR-485-5p	2.33383	-	-	GAATTCATCACGGCCAGCCTCT
miR-146a	-	4.87137	3.66729	AACCCATGGAATTCAGTTCTCA
miR-129	-	2.56272	-	GCAAGCCCAGACCGCAAAAAG
miR-17-5p	-	-	0.308496	ACTACCTGCACTGTAAGCACTTTG
miR-191	-	-	2.60866	AGCTGCTTTTGGGATTCCGTTG
miR-499	-	-	4.90793	TTAAACATCACTGCAAGTCTTAA
miR-210	-	-	0.382623	TCAGCCGCTGTCACACGCACAG
miR-136	-	-	0.298486	TCCATCATCAAAACAAATGGAGT
miR-98	-	-	2.73662	AACAATACAACTTACTACCTCA
miR-185	-	-	2.72053	GAACTGCCTTTCTCTCCA
miR-324-5p	-	-	0.291045	ACACCAATGCCCTAGGGGATGCG
miR-301	-	-	0.210653	GCTTTGACAATACTATTGCACTG
miR-709	-	-	2.82365	TCCTCCTGCCTCTGCCTCC
miR-711	-	-	2.53486	CTTACATCTCTCCCCGGGTCCC
miR-551a	-	-	0.222991	TGGAAACCAAGAGTGGGTCGC
