# Supplementary material for: Discovery of Porcine microRNAs and Profiling from Skeletal Muscle Tissues during Development
Source: PLoS One. 2008 Sep 16;3(9):e3225. doi: 10.1371/journal.pone.0003225 (PMC2528944; doi:10.1371/journal.pone.0003225)
Supplement: Table S7 — (1.87 MB XLS) [file pone.0003225.s008.xls]

## Sheet: ST7
Supplemental Table 7: Predicted miRNA Targets
miRNA Family	Gene Symbol	Gene Tax ID	Number of Sites
miR-495	CSNK1E	10090	4
let-7/98	EGR3	9606	4
miR-125/351	DAG1	9606	4
miR-129-5p	CACNG2	9615	5
miR-144	RFXDC2	10090	8
miR-409-3p	ANXA4	10116	4
miR-186	MOSPD1	10116	4
miR-299-3p	SHANK3	9606	4
miR-148/152	CAMK2A	10116	4
miR-17-5p/20/93.mr/106/519.d	EPHA4	10116	10
miR-495	SP2	10116	4
miR-196	PPP1R16B	10090	4
let-7/98	XKR8	9606	4
miR-499	EDAR	9606	4
miR-186	HOXB8	9615	4
miR-186	RNF138	10090	4
miR-18	THRAP1	9615	4
miR-214	ARVCF	10116	4
miR-138	AFF3	10116	5
miR-186	SLC23A2	9031	5
miR-378*	FAM129A	9606	4
miR-200bc/429	CASKIN1	9615	4
miR-193	SON	10116	5
miR-218	SEC61A1	10090	4
miR-199	NDEL1	10116	4
miR-125/351	KLHL24	10090	4
miR-485-5p	SMG1	10116	4
miR-495	WHSC1	10116	4
let-7/98	HMGA2	9615	35
miR-29	HDAC4	9615	5
miR-182	SYPL1	10090	4
miR-1/206	TFEC	9615	4
miR-181	FLT1	9615	4
miR-542-3p	SR140	9615	5
miR-17-5p/20/93.mr/106/519.d	GLIS3	10116	4
miR-186	LRBA	9615	4
miR-17-5p/20/93.mr/106/519.d	WNK3	10116	4
miR-155	GPR85	9615	4
miR-137	ZMAT4	10116	4
miR-181	RKHD2	9615	4
miR-145	PAPD5	9615	4
miR-410	SLC4A7	10116	4
miR-15/16/195/424/497	PCDHA3	9615	5
miR-15/16/195/424/497	ARL10	10116	4
miR-204/211	UBE2R2	9615	4
miR-17-5p/20/93.mr/106/519.d	DCBLD2	10116	4
miR-125/351	ADAM11	9615	4
miR-181	PICALM	10116	5
miR-149	NTRK3	10090	4
miR-376	BPTF	10116	5
miR-186	MSL2L1	10116	4
miR-542-3p	LSM1	9615	4
miR-93.hd/291-3p/294/295/302/372/373/520	HIF1AN	9031	5
miR-493-5p	PHF17	9615	4
miR-27	CLK2	9615	4
miR-148/152	TNPO3	9615	4
miR-182	CACNB2	10116	4
miR-27	P2RY5	9031	5
miR-93.hd/291-3p/294/295/302/372/373/520	IQSEC2	10116	4
miR-130/301	BAHD1	9606	5
miR-145	NARG1	10116	4
miR-129-5p	GNAZ	10116	4
miR-17-5p/20/93.mr/106/519.d	E2F1	10116	8
let-7/98	AAK1	9615	4
miR-410	CNTNAP1	10116	4
miR-29	UNK	10116	4
miR-542-3p	ANKRD28	10090	4
miR-1/206	RP11-78J21.1	10116	4
miR-141/200a	PEX5	10116	4
miR-204/211	FUBP3	9615	4
miR-542-3p	NOMO3	9615	4
miR-196	CECR6	9615	4
miR-186	UPF1	10090	5
miR-204/211	KIAA0157	9615	5
miR-335	PHF20L1	10116	4
miR-218	SOCS7	9606	4
miR-382	SGK	9615	4
miR-181	CTTNBP2NL	10116	5
miR-125/351	TRIAP1	9606	4
miR-299-5p	SEZ6L2	10116	4
miR-17-5p/20/93.mr/106/519.d	NIPA1	9615	4
miR-27	NAP1L3	9031	5
miR-28	MYST3	10090	4
miR-485-5p	WDTC1	9606	4
miR-370	TRAIP	10090	4
miR-130/301	SNF1LK	9615	5
miR-181	GAPVD1	9606	5
miR-377	EPB49	10116	4
miR-137	LOC203547	9615	4
miR-27	ARPP-19	9615	4
miR-7	CCNT2	9606	4
miR-141/200a	AK3L1	9615	4
miR-101	XKR6	9031	5
miR-7	PCDHGA12	10116	4
miR-183	DCX	10090	5
miR-27	TA-NFKBH	10116	8
miR-409-3p	SH3BGRL3	10116	4
miR-137	SLC39A5	9606	4
miR-409-5p	ZIC3	9615	4
miR-410	IGF2BP3	10116	4
miR-30-5p	SFRS7	10116	4
miR-200bc/429	GLRA2	10116	4
miR-485-5p	MPZ	10116	4
miR-323	UBE2D3	9615	5
miR-191	AMMECR1L	9031	5
miR-323	PLAGL1	10116	4
miR-365	LOC283514	10116	5
miR-378*	DLG2	10116	4
miR-144	CDH5	9606	4
miR-101	C11orf30	9031	5
miR-200bc/429	PREI3	10116	4
miR-29	CPEB3	9615	5
let-7/98	CBL	9615	8
miR-182	SPRY4	9606	4
miR-214	NRXN3	9606	4
miR-485-5p	TEX261	10090	4
miR-185	PBX2	9615	4
miR-329	RAPH1	10116	4
miR-410	LARP1	10116	4
miR-185	SNX19	10090	4
miR-503	TSPYL2	9615	4
miR-186	HNRPU	9615	9
miR-214	PTDSS1	10090	4
miR-379	HLCS	9615	4
miR-129-5p	ZFHX4	9615	5
miR-181	KIAA1219	9031	5
miR-299-5p	HNRPC	10090	4
miR-503	DYRK1B	10116	4
miR-137	FOXC1	10090	4
miR-200bc/429	SLITRK1	9606	5
miR-196	PLDN	9606	4
miR-1/206	PREX1	10116	4
miR-27	FOXP2	9031	5
miR-323	TLK1	10090	5
miR-28	OTUB1	10090	4
miR-409-3p	C4orf34	10090	4
miR-410	ZBTB7A	10116	4
miR-145	RBPMS	9615	4
miR-200bc/429	ZDHHC17	10116	5
miR-186	MBNL2	10116	8
miR-335	DAAM1	9615	4
miR-138	PACSIN2	10090	4
miR-495	WDTC1	10116	4
miR-181	NFAT5	10116	4
miR-27	IKZF2	9615	5
miR-27	UBE2V1	10090	5
miR-148/152	ABCB7	10116	4
miR-150	MBD6	9615	12
miR-218	MPPED2	9031	5
miR-503	CXCL10	9615	4
miR-542-3p	UBL4A	10116	4
miR-214	SFRS10	9615	4
miR-186	TTC13	9615	4
miR-130/301	PHF12	9615	5
miR-410	RAI14	10116	4
miR-503	USP2	9615	4
miR-125/351	SMEK1	10116	10
miR-30-5p	PIP5K2B	9615	5
miR-370	KCTD21	9615	4
miR-27	INSM2	9606	4
miR-137	RBMS3	9615	5
miR-125/351	SCN5A	10116	4
miR-370	RNF20	9615	4
miR-223	KPNA3	10090	4
miR-200bc/429	FN1	10116	4
miR-181	CDC73	9615	4
miR-204/211	TCF7L1	10116	4
miR-144	CDC14B	9615	4
miR-503	ZFHX4	9031	5
miR-93.hd/291-3p/294/295/302/372/373/520	SSX2IP	9615	5
miR-27	MIER3	9606	5
miR-218	MBD6	10116	8
miR-499	ZBTB10	9606	4
miR-362	SEPHS1	10116	4
miR-101	HNRPF	9606	8
miR-148/152	CNTN4	9615	5
miR-129-5p	UNC13A	9615	4
miR-10	POPDC2	9615	4
miR-377	EDG1	9615	4
miR-181	IQGAP2	9606	5
miR-148/152	BCL7B	10116	4
miR-15/16/195/424/497	PHF19	10090	5
miR-370	IGF2BP1	10116	4
miR-214	CDH11	9606	4
miR-188	HNT	10116	4
miR-493-5p	IRF2	9615	4
miR-30-5p	ZDHHC21	10090	4
miR-130/301	WDR20	9615	10
miR-205	LCOR	10116	4
miR-214	PHF6	9615	4
miR-186	NARG1	9606	5
let-7/98	MGA	9615	5
miR-181	ZDHHC17	10090	4
miR-145	SCAMP3	10116	4
miR-485-3p	DDEF2	10090	4
miR-136	LIFR	10090	4
miR-542-3p	GNAZ	10090	4
miR-378*	EVI1	9615	5
miR-144	ESRRG	10116	8
miR-29	SHPRH	9606	4
miR-30-5p	ESPN	9615	4
miR-148/152	LRP8	10090	4
miR-200bc/429	DACT1	9615	4
miR-218	MGC13057	9606	4
miR-495	TNFRSF21	9615	5
miR-431	CHODL	9606	4
miR-409-3p	CREB5	9615	4
miR-18	SNURF	9606	5
miR-129-5p	PLCG1	9615	4
miR-493-5p	KPNA4	9615	14
miR-144	C11orf30	9615	5
miR-7	EIF2C1	10090	5
miR-17-5p/20/93.mr/106/519.d	PHF1	10116	4
miR-101	ODZ3	9031	5
miR-199	RANBP2	9031	5
miR-299-3p	ADD1	9031	5
miR-101	RNF38	10090	5
miR-17-5p/20/93.mr/106/519.d	C1orf9	10116	4
miR-148/152	NPTX1	9615	4
miR-30-5p	VKORC1L1	10116	5
miR-183	XKR6	9615	4
miR-18	GAB2	10116	4
miR-137	HD	9615	4
miR-7	CPEB2	9615	5
miR-183	SSRP1	10090	4
miR-186	PLP1	9606	4
miR-410	RGL1	10116	4
miR-499	KIAA1729	9615	4
miR-335	CEP350	10090	4
miR-409-3p	ALPL	9615	4
miR-214	RAB14	9615	9
miR-186	PDGFC	10090	5
miR-27	NXF1	10090	4
miR-485-3p	ATP1B1	9606	5
miR-200bc/429	SRF	9615	8
miR-17-5p/20/93.mr/106/519.d	NAGK	9615	4
miR-18	ARL15	10116	4
miR-205	SP4	9615	4
miR-17-5p/20/93.mr/106/519.d	PKN2	10116	5
miR-17-5p/20/93.mr/106/519.d	HMGB3	9606	4
miR-17-5p/20/93.mr/106/519.d	CBLN4	10116	4
miR-125/351	BAP1	9615	4
miR-30-3p	NIPBL	10116	4
miR-204/211	C1orf144	9615	4
miR-299-5p	VCP	9615	4
miR-130/301	EIF2C4	10090	9
miR-493-5p	MARK4	9615	4
miR-138	BNIP3L	9606	5
miR-141/200a	MOBKL2B	9606	4
miR-200bc/429	ARID4B	9615	5
miR-144	FZD6	9606	4
miR-138	YPEL4	9606	4
miR-93.hd/291-3p/294/295/302/372/373/520	FAM117A	9615	4
miR-495	C12orf48	9606	4
miR-382	ZFP106	10116	4
miR-101	PHTF2	10090	5
miR-204/211	FRAS1	10090	4
miR-362	NOL4	10116	4
miR-409-3p	ZNF236	9606	4
miR-182	KCMF1	9615	5
miR-185	EIF2C1	10090	4
miR-365	PLEKHA3	9606	4
miR-503	FAM81A	9615	4
miR-495	FLRT2	10116	4
miR-17-5p/20/93.mr/106/519.d	SNTB2	9615	4
miR-183	PPP1R14B	10116	4
miR-323	KLF5	9615	4
miR-411	CUGBP2	10090	5
miR-204/211	ANXA11	9615	4
miR-181	USP15	9615	10
miR-30-3p	TOX2	9606	4
miR-223	MTPN	9615	4
miR-370	TRIT1	10090	4
miR-378	SHANK3	10090	4
miR-409-3p	EIF4B	9615	4
miR-150	C1orf96	10090	4
miR-30-3p	SUHW2	9615	4
miR-17-5p/20/93.mr/106/519.d	ZBTB4	9615	12
miR-210	LRRC62	10116	4
miR-29	RLF	10116	5
miR-329	NFASC	10090	4
miR-144	TTN	9606	5
miR-186	MYT1L	9606	5
miR-15/16/195/424/497	GHR	9031	5
miR-30-5p	FLJ10815	9606	4
miR-485-5p	ZFP91	10116	4
miR-17-5p/20/93.mr/106/519.d	SOLH	10090	5
miR-329	RBM33	9606	4
miR-141/200a	TSHZ3	10116	5
miR-214	PHF15	9615	4
miR-331	MLL2	10090	8
miR-455	RIMS4	9615	4
miR-30-3p	ANKFY1	10116	4
miR-144	RAP2C	9606	5
miR-181	TXNDC12	9615	4
miR-101	REV3L	9615	5
miR-377	NUFIP2	10090	4
miR-148/152	PRDM15	9615	4
miR-329	BRUNOL6	10090	4
miR-299-5p	PTPN1	10090	4
miR-186	FAM120A	9031	5
miR-210	ZNF148	10116	4
miR-182	JUB	10116	4
miR-370	RAB5B	9615	4
miR-15/16/195/424/497	HAS2	10116	5
let-7/98	ZC3H3	9606	5
miR-150	TMCC1	9615	5
miR-182	RAB7A	9606	5
miR-218	PPP1CB	10116	4
miR-455	HNRPC	9615	4
miR-363	FOXK2	9606	4
miR-486	NEUROD6	9615	4
miR-140	R3HDM1	10090	4
miR-335	MOSPD1	9615	4
miR-377	JMJD3	10116	4
miR-1/206	SFRS2IP	10090	4
miR-144	CUL4B	9615	5
miR-218	PCDHA1	9606	4
miR-370	STK16	9615	4
let-7/98	RNF44	10116	5
miR-30-5p	IDH1	9606	4
miR-186	RPS6KA3	9606	10
miR-378	RGS2	9606	4
miR-495	PCDHA8	9615	4
miR-409-5p	LOC283871	9606	4
miR-140	CALD1	10090	4
miR-136	UBTD2	10116	5
miR-125/351	SH2B3	10116	4
miR-182	PDZD4	9615	4
miR-129-5p	ITGA6	10116	4
miR-223	RNF34	9606	4
miR-30-5p	UBN1	10116	5
miR-299-3p	NDST1	9606	4
miR-1/206	CLOCK	10090	4
miR-129-5p	CPSF6	9606	4
miR-486	LOC153222	9606	5
miR-130/301	DNM2	9606	4
miR-299-5p	SGK	9615	4
miR-329	PABPN1	9606	4
miR-299-5p	BAGE5	10116	4
miR-186	PID1	10116	4
miR-335	PHTF2	10090	4
miR-15/16/195/424/497	COL12A1	9606	5
miR-149	SORD	10116	4
miR-182	FRS2	10116	14
miR-17-5p/20/93.mr/106/519.d	SRPK1	9606	4
miR-410	TRIOBP	10116	4
miR-503	IPPK	9615	4
miR-130/301	PRKD3	9615	4
miR-30-5p	GNAI2	10090	8
miR-193	SIAH1	10090	5
miR-410	OTX2	10116	4
miR-503	FLJ37357	9606	4
miR-299-5p	NCOA1	9615	4
miR-410	MED12	9615	4
miR-199	ABCC5	9031	5
miR-1/206	ITSN2	10116	4
miR-204/211	ZFYVE20	10090	4
miR-223	ARL6IP2	10116	5
miR-144	TNRC6B	9031	10
miR-141/200a	CPD	9615	4
miR-93.hd/291-3p/294/295/302/372/373/520	ATP2B2	10090	5
miR-30-5p	KIF5B	9615	4
miR-499	SOX4	10116	4
miR-191	KIAA1787	9615	4
miR-205	HDAC4	9615	4
miR-15/16/195/424/497	ETNK1	10116	5
miR-331	PIM1	10116	4
miR-335	TEAD1	9615	4
miR-30-5p	CBFB	9615	4
miR-15/16/195/424/497	CCNE1	10116	10
miR-15/16/195/424/497	SMAD7	9615	5
miR-200bc/429	ARHGEF17	10116	4
miR-182	PAIP2	9615	5
miR-186	EFEMP1	10090	8
miR-125/351	BSN	10090	4
miR-205	LOC728215	9615	5
miR-218	PFN2	9606	4
miR-199	STK4	9606	5
miR-495	MIPOL1	9031	5
miR-409-5p	CALM1	9615	4
miR-30-3p	CUGBP2	9615	5
miR-335	SLC9A1	9615	4
miR-323	ULK2	10116	4
miR-22	MTHFR	9615	4
miR-22	FAM100A	9615	4
miR-223	MLL3	9615	5
miR-129-5p	HNRPUL2	10116	4
miR-101	EPB41L1	10116	4
let-7/98	TSC1	9615	4
miR-218	DIRAS2	10116	4
miR-150	SETD5	10116	8
miR-30-5p	PHACTR2	9615	5
miR-29	YPEL2	10116	9
miR-27	NEK6	10116	4
miR-141/200a	MAPK6	10116	5
miR-144	ACBD3	9606	4
miR-1/206	SEMA6D	9606	5
miR-17-5p/20/93.mr/106/519.d	LASS6	10090	4
miR-193	CNBP	10116	5
miR-495	PFN2	9615	5
miR-409-3p	ARHGEF18	9615	4
miR-181	BCLAF1	9615	9
miR-299-5p	LRRTM4	9615	4
miR-186	APRIN	10116	4
miR-331	PPAPDC3	9615	4
miR-370	RAB6B	9606	4
miR-17-5p/20/93.mr/106/519.d	CRK	9031	5
miR-218	C6orf85	9031	5
miR-503	NKD1	10116	5
miR-28	TTMB	9615	5
miR-455	TAF4	10090	5
miR-486	NRK	10090	4
miR-30-5p	ELMO1	10090	5
miR-370	WDR32	10090	4
miR-27	UBE2Q1	10116	4
miR-27	SOCS4	9615	4
miR-145	NDUFA4	9615	5
miR-24*	DEADC1	9031	5
miR-29	DCX	9606	5
miR-499	TMEM47	9606	4
miR-29	ZER1	10116	4
miR-141/200a	HMG20A	10090	4
miR-22	STAM2	9615	4
miR-17-5p/20/93.mr/106/519.d	ZNF652	10090	4
miR-93.hd/291-3p/294/295/302/372/373/520	NEO1	9615	4
miR-329	PRKACB	9606	4
miR-218	LASP1	10090	4
miR-93.hd/291-3p/294/295/302/372/373/520	GABPB2	10116	4
miR-141/200a	SLC39A9	10116	4
miR-15/16/195/424/497	PPAP2A	9606	5
miR-29	PGAP1	10090	4
miR-410	PLXND1	9615	4
miR-485-5p	PCTK3	9615	4
miR-377	RFXDC2	9615	4
miR-183	BIRC6	10116	5
miR-1/206	LPPR4	9615	5
miR-27	POLS	10116	5
miR-145	KIAA1542	10116	4
miR-505	KLHL9	9615	4
miR-410	FCHO2	10116	4
miR-181	SLC38A2	9031	5
miR-363	ESRRG	9031	5
miR-503	ACVR2B	10116	5
miR-27	IGF1	9031	5
miR-144	FBXW11	10116	5
miR-30-3p	CAV1	10116	4
let-7/98	RPUSD3	9606	4
miR-499	H2AFZ	10116	5
miR-218	SFRS12	10090	5
miR-181	PCDHA6	10090	5
miR-182	SLC4A7	9615	5
miR-24*	SET	9615	4
miR-495	NHLH2	10116	4
miR-22	FURIN	10116	4
miR-485-3p	SOX11	10116	5
miR-505	PCDHAC1	9606	4
miR-218	MITF	10090	5
miR-30-5p	EDEM3	9615	8
miR-503	SNRK	9031	5
miR-15/16/195/424/497	SLC9A6	10090	4
miR-15/16/195/424/497	MAP3K7IP3	10116	5
miR-382	ARPC2	9606	4
miR-186	SGPP1	9615	4
miR-218	RIMS3	9615	8
miR-491	ZNF644	10116	4
miR-181	PIAS3	9615	4
miR-378	ACTL6A	9606	5
miR-141/200a	KCNJ2	9606	5
miR-485-5p	PAK1	10116	4
miR-29	MAT2A	9615	4
miR-27	ZFHX4	9606	5
miR-182	MAP2K3	10116	4
miR-204/211	NFAT5	10116	5
miR-28	IKZF4	9615	4
miR-410	COPS7B	9615	4
miR-10	BCL2L11	10116	5
let-7/98	PLCXD3	9606	4
miR-329	DNM3	10090	4
miR-30-5p	LPPR4	9606	5
miR-137	MEGF11	9606	5
miR-149	KHSRP	9606	4
miR-182	C6orf106	9606	5
miR-101	ASPN	9606	8
miR-129-5p	CMIP	9615	4
miR-214	CUGBP2	10090	4
miR-409-5p	HAPLN4	10090	4
miR-503	CBX4	9606	5
miR-30-5p	PNN	9615	5
miR-200bc/429	NRIP1	10090	5
miR-10	SLC38A2	10116	4
miR-363	RAB22A	9615	4
miR-186	CPEB2	10116	5
miR-410	UBE2B	10116	5
miR-144	KBTBD8	10090	9
miR-29	IGF1	10116	10
miR-505	RNPS1	10116	4
miR-205	CCNJ	9615	5
miR-30-5p	UBE2J1	9031	5
miR-410	SP1	9606	4
miR-205	MAGI1	10090	5
miR-150	SRGAP3	9615	4
miR-186	PAPD5	10090	12
miR-377	H6PD	10116	4
miR-137	PALM2-AKAP2	9615	9
miR-410	ATF1	10116	5
let-7/98	WDR37	9615	5
miR-455	WDFY3	10116	4
miR-299-5p	ADAM28	10090	4
miR-218	ZNF650	10090	5
miR-204/211	MLLT3	9615	4
miR-30-5p	CAMTA1	9615	5
miR-493-5p	NCOA6	10090	4
miR-29	BCL7A	10090	4
miR-378*	IGF1R	9615	5
miR-1/206	HDAC4	10116	10
miR-324-5p	SACS	10116	4
miR-27	FAM98A	9615	5
miR-29	ZBTB46	9615	8
miR-29	NANP	9615	4
miR-499	KIAA0280	10116	5
miR-323	2008-09-03	9606	4
miR-125/351	IHPK1	9615	4
miR-125/351	ZBTB47	9606	4
miR-125/351	IL16	9606	4
miR-493-5p	SH2D3C	9615	4
miR-365	CSK	9606	4
miR-495	KIAA1212	9615	4
miR-138	KCNMA1	9615	9
miR-214	SP5	10116	4
miR-378*	CLCN4	9615	4
miR-130/301	PHF17	9615	9
miR-200bc/429	EP300	9606	5
miR-29	CPNE8	9615	4
miR-30-3p	ATBF1	9615	8
miR-30-5p	CAPZA1	9606	5
miR-335	ZRANB1	10116	4
miR-17-5p/20/93.mr/106/519.d	LHX6	10116	5
miR-17-5p/20/93.mr/106/519.d	RNF13	9606	5
miR-30-5p	LRCH2	9606	5
miR-186	PCDHAC1	9615	4
miR-409-3p	CSNK1G1	10090	4
miR-188	PPP2CA	10116	4
miR-299-5p	USP39	9606	4
miR-138	JOSD1	10116	4
miR-485-5p	OGT	9615	4
miR-191	FZD5	10090	4
miR-200bc/429	GPR158	10116	5
miR-363	EDARADD	9615	4
miR-378	CLCF1	9606	4
miR-199	SMARCD1	9615	4
miR-93.hd/291-3p/294/295/302/372/373/520	RBBP7	10090	4
miR-205	VASN	9615	8
miR-378	ODZ1	9615	4
let-7/98	CCND2	9031	15
miR-27	RP11-130N24.1	10116	5
miR-30-5p	CAND1	9615	5
miR-18	PLAG1	10116	4
miR-129-5p	A2BP1	10116	5
miR-181	RAB11FIP2	10116	5
miR-7	FLYWCH1	9615	4
miR-214	ATP2B4	10116	4
miR-377	KIAA1024	9615	4
miR-93.hd/291-3p/294/295/302/372/373/520	YTHDF3	9606	5
miR-15/16/195/424/497	PLXNA2	9615	5
miR-377	SMG1	10090	4
miR-183	PAM	10090	4
miR-29	PCDH17	10090	8
miR-183	MBNL1	10116	5
miR-27	APRIN	10116	9
miR-181	HNRPH1	9031	5
miR-30-5p	B3GNT5	10116	4
miR-22	NFIB	9615	5
miR-10	PPARA	9615	4
miR-29	CCDC85A	9615	5
miR-378	SLC39A13	10090	4
miR-218	SLC6A1	10116	14
miR-93.hd/291-3p/294/295/302/372/373/520	PAN3	10116	5
miR-30-5p	MARCKS	9615	5
miR-370	FAM123B	9615	4
miR-141/200a	VPS26B	9615	4
miR-335	RTN4RL1	9615	4
miR-155	PELI1	10116	4
miR-495	RANBP1	10116	4
miR-129-5p	ELAVL1	10090	4
miR-30-3p	SLITRK3	10116	4
miR-93.hd/291-3p/294/295/302/372/373/520	CADM1	9606	4
miR-144	ZNF618	10116	5
miR-30-5p	NEUROG1	9615	4
miR-378*	FMOD	10116	4
miR-17-5p/20/93.mr/106/519.d	ZBTB41	9615	4
miR-140	PDGFRA	10116	5
miR-29	C11orf59	9606	4
miR-129-5p	DUSP16	9615	4
miR-149	LOC91461	9615	4
miR-93.hd/291-3p/294/295/302/372/373/520	BLCAP	9615	4
miR-30-5p	ZBTB39	9606	8
miR-299-5p	CNOT3	10116	4
miR-29	DPF1	9606	4
miR-542-3p	MTPN	10116	5
miR-30-5p	EPC2	10116	5
miR-15/16/195/424/497	MAP2K3	10090	4
miR-144	PURB	9615	8
miR-10	ITGB8	9615	4
miR-181	FAM73B	9615	4
miR-323	FZD5	10116	4
miR-155	DNAJB7	10116	4
miR-140	TAF9B	10116	4
miR-503	SLC20A2	10116	5
miR-138	C14orf118	9606	4
miR-181	DCBLD2	10116	8
miR-181	ARL5A	9615	4
miR-409-3p	RP11-493K23.3	10116	4
miR-205	C4orf34	9615	4
miR-149	STX6	10090	4
miR-200bc/429	KLF13	9615	5
miR-185	FMO2	9615	4
miR-376	TRIM13	9031	5
miR-204/211	SIN3A	9606	4
let-7/98	MEIS2	9615	5
miR-27	HOXC11	9615	4
miR-495	TMEM47	9615	4
miR-335	C14orf101	9606	4
miR-101	PTGS2	10116	4
miR-93.hd/291-3p/294/295/302/372/373/520	FRMD4A	10090	5
miR-196	ZDHHC21	10116	4
miR-204/211	ZNF148	9615	4
miR-27	EIF2C2	10116	9
miR-218	PCDHA13	9615	4
miR-30-5p	RAPH1	9031	5
miR-18	PAPPA	9606	4
miR-182	ARHGDIA	10116	4
miR-130/301	GRM7	10090	4
miR-186	USP42	9615	4
miR-181	SYNPR	10116	4
miR-181	LOC158381	10116	5
miR-136	ETF1	9615	5
miR-193	SPATA7	9606	4
miR-323	PPP1R12A	9615	5
miR-199	PLXND1	9615	4
miR-7	SETD8	9615	8
miR-93.hd/291-3p/294/295/302/372/373/520	KLHL3	9615	4
miR-218	DCUN1D1	9031	5
miR-129-5p	SIAH1	9615	4
miR-493-5p	FNIP1	9615	8
miR-493-5p	AAK1	9606	4
miR-223	NFIA	9606	5
miR-485-3p	AFF4	9615	4
miR-101	SRPK2	9615	5
miR-30-3p	RNF141	10090	4
miR-214	CHPF	10116	4
miR-27	ZFAND3	9031	5
miR-376	MLL3	9615	4
miR-17-5p/20/93.mr/106/519.d	TRIM3	10116	4
miR-382	SFRS1	10116	4
miR-27	PSMA1	9606	4
miR-125/351	JUP	10090	4
miR-323	CREB1	9615	4
miR-200bc/429	MARCKS	9615	4
miR-183	NFYC	9615	4
miR-335	NEBL	9606	4
miR-503	GOLGA1	9615	4
miR-196	HOXA9	10090	10
miR-101	FBXO32	10090	4
let-7/98	TSC22D2	10116	5
miR-196	POMT2	10090	4
miR-130/301	NHS	10116	5
miR-130/301	LCORL	9615	5
miR-130/301	FLJ31951	9615	5
miR-505	ARHGAP12	10116	4
miR-137	SV2A	9615	4
miR-491	SHANK3	9615	4
miR-125/351	APBA2BP	10116	8
miR-186	RIOK3	10090	4
miR-149	NONO	9615	4
miR-382	TSC22D3	9615	4
miR-382	LMTK3	10116	4
miR-329	MSX2	9606	4
miR-17-5p/20/93.mr/106/519.d	ARHGAP26	9615	4
miR-485-5p	TSC22D3	10116	4
miR-93.hd/291-3p/294/295/302/372/373/520	SETD5	9615	4
miR-129-5p	GABBR2	9031	5
miR-499	ESRRG	9615	9
miR-1/206	SULF1	10090	4
miR-485-5p	PPP1R14D	9615	4
miR-485-3p	OTUD4	9615	4
miR-137	KIAA0828	10090	5
miR-182	ARHGEF12	10116	4
miR-503	STOX2	10116	4
miR-218	LRRC62	10090	4
miR-1/206	AP3D1	9615	5
miR-183	PEX19	10090	4
miR-491	PUM1	10116	4
miR-30-5p	P4HA2	9615	4
miR-542-3p	ZNF148	10116	5
miR-299-5p	CUL5	10116	4
miR-140	CHD4	10116	4
miR-200bc/429	NUP153	10116	10
miR-377	ELAVL1	10116	4
miR-138	NFIB	9031	15
miR-370	UPF1	10090	4
miR-27	TMEM110	9615	4
miR-409-3p	RAP2C	9615	4
miR-141/200a	MYRIP	9606	4
miR-410	RP11-130N24.1	9615	9
miR-493-5p	SNRPB2	10090	4
miR-101	KIAA1212	9615	4
miR-93.hd/291-3p/294/295/302/372/373/520	ZDHHC9	10116	4
miR-503	KIAA1305	10116	4
miR-505	MGAT4A	10116	4
miR-299-5p	KIAA0355	10116	4
miR-495	ATRN	10090	5
miR-155	ETS1	10116	4
miR-130/301	RBM9	9031	5
miR-125/351	RAPGEFL1	10090	4
miR-148/152	ZNRF1	10090	4
miR-329	ELOVL4	9615	4
miR-329	DCUN1D3	9615	5
miR-129-5p	CSMD2	10090	8
miR-130/301	SLC8A1	10090	4
miR-1/206	C15orf42	9615	4
miR-148/152	ATP7A	9606	4
miR-150	RNASEH2C	9606	4
miR-218	KCNA1	10116	5
miR-223	FAT	10116	5
miR-503	ACSL4	10090	4
miR-150	SLC38A3	10090	4
miR-27	AFAP1	9615	8
miR-30-3p	SLC25A33	9615	4
miR-145	MOBKL2B	10116	4
miR-1/206	VGLL4	10116	5
miR-409-3p	EYA4	9606	5
miR-15/16/195/424/497	CHD2	9031	7
miR-130/301	RXFP2	9615	4
let-7/98	SCUBE3	10116	4
miR-10	SETD5	10090	4
miR-138	Kua-UEV	10116	5
miR-331	NISCH	10090	4
miR-101	FBXL3	9615	4
miR-22	PPP1R15B	10116	5
miR-193	ZDHHC18	9615	4
miR-29	NCOA4	10116	4
miR-409-3p	FLJ31951	10090	5
miR-137	RNF38	9615	5
miR-495	USP38	9615	4
miR-423	FGFR2	10116	4
miR-136	TMEM161B	9615	4
let-7/98	PYGO2	10090	4
miR-493-5p	INSM1	9615	4
miR-15/16/195/424/497	ACSL1	9615	4
miR-376	IGF1R	9615	5
miR-183	SOCS6	9606	5
miR-218	GPM6A	9615	4
miR-30-5p	ANKHD1	9031	5
miR-200bc/429	RND3	10090	10
miR-182	TNRC6B	9615	4
miR-410	MGA	10116	5
miR-186	PRPF39	10116	4
miR-335	SRPR	10116	4
miR-186	GRIA2	10090	5
miR-130/301	CPEB2	9615	5
miR-18	ASXL2	9615	5
miR-196	USP15	9615	5
miR-223	PURB	10116	4
miR-183	ZNF294	9615	4
miR-30-5p	SYNGR3	10090	5
miR-150	SFRS2	10090	4
miR-150	NFASC	10116	4
miR-138	EGFLAM	10116	4
miR-93.hd/291-3p/294/295/302/372/373/520	DERL2	10116	5
miR-30-5p	CAMK2N1	10116	4
miR-200bc/429	AFF3	10116	4
miR-140	SENP1	10090	4
miR-299-5p	MYEF2	9606	9
miR-486	HECW2	10116	4
miR-323	MPPED2	9615	4
miR-223	FOXO3A	9615	5
miR-495	RAB39	9615	4
miR-495	MPPED2	9606	7
miR-27	GOLPH2	10116	4
miR-150	HIG2	9615	4
miR-214	GRIN1	10116	4
miR-365	PTEN	10090	5
miR-7	AADACL1	10090	4
miR-503	ANKRD15	10116	5
miR-370	NAT11	10116	8
miR-409-3p	RHOF	9606	4
miR-204/211	RPS6KA3	9606	4
miR-486	JARID1B	9615	4
miR-141/200a	HIAT1	9606	4
miR-27	SAP30BP	10090	4
miR-378*	YTHDC1	10090	4
miR-493-5p	BRD7	10116	4
miR-409-5p	RND3	9615	4
miR-29	AIM1L	9606	4
miR-186	AMOT	10090	4
miR-144	DR1	10116	5
miR-382	RPE	10116	4
miR-365	BMI1	9031	5
miR-137	C14orf32	9615	5
miR-182	FXR1	10116	5
miR-363	BICD2	9615	4
miR-129-5p	PRDM1	9606	4
miR-22	PLCXD3	10116	4
miR-155	TLE4	10116	5
miR-145	RAB5C	9615	5
miR-200bc/429	GATA2	10116	5
miR-137	C20orf39	9606	8
miR-323	UBAP2	10116	4
miR-181	DAZAP2	9606	4
miR-125/351	ACCN2	9606	4
miR-218	MAFG	9615	8
miR-323	ACAT2	10090	4
miR-22	TNRC6B	10116	5
miR-200bc/429	PHF6	9615	9
miR-182	RGS17	10116	9
miR-365	WDR37	10090	5
miR-146	SLITRK3	10116	4
miR-145	EPB41L5	9615	4
miR-101	PHF20L1	9615	5
miR-130/301	MYBL1	9615	19
miR-370	ANK3	10090	4
miR-130/301	SOX5	9615	4
miR-29	KCTD15	10116	4
miR-29	TRIM63	9615	4
miR-495	C9orf25	9615	4
miR-27	NRP2	9615	5
miR-196	JARID1A	9615	4
miR-370	IXL	10116	4
miR-30-5p	CECR6	10090	4
miR-15/16/195/424/497	TMEM135	9615	4
miR-101	PLCG1	9615	4
miR-29	PRKG1	9606	5
miR-101	HDGFRP3	10090	5
miR-542-3p	DMN	9606	4
miR-17-5p/20/93.mr/106/519.d	RAPGEF4	10116	5
miR-125/351	ZNF76	10116	4
miR-186	MBNL1	9615	4
miR-149	AP1G1	10116	5
miR-182	HBP1	9606	4
miR-93.hd/291-3p/294/295/302/372/373/520	ASXL2	9031	5
miR-15/16/195/424/497	MLL3	10116	5
miR-29	ZFX	10116	8
miR-125/351	SAMD10	10090	4
miR-17-5p/20/93.mr/106/519.d	WAC	9615	5
miR-181	TCBA1	9031	5
miR-186	EPN2	10090	4
miR-17-5p/20/93.mr/106/519.d	SQSTM1	9606	4
miR-493-5p	CUL3	9615	4
miR-378	FGFR1OP2	9615	4
miR-205	LAMC1	10116	5
miR-299-5p	TBX3	9606	4
miR-485-5p	LRP4	9615	4
miR-377	NCAM1	9031	5
let-7/98	PRDM1	10116	5
miR-144	VCAN	9615	4
let-7/98	TMEM2	9615	4
miR-181	SCHIP1	10116	5
miR-137	RICS	9615	4
miR-183	ZNF289	9606	4
miR-362	PCDHA2	10116	4
miR-200bc/429	AKAP7	9606	4
miR-182	PPP3R1	9031	5
miR-495	SUHW2	9606	4
let-7/98	CLP1	9606	4
miR-30-5p	ATF1	9615	4
miR-15/16/195/424/497	UBE2V1	9031	9
miR-329	STC2	10116	4
miR-27	ADAMTSL3	9606	5
miR-183	CPEB1	10116	5
miR-323	FLJ10292	10116	4
miR-493-5p	FAM120A	9606	4
miR-331	RP13-102H20.1	9606	4
miR-199	TUBG1	10116	4
miR-200bc/429	LRP1B	10116	10
miR-323	HOXB5	9615	4
miR-93.hd/291-3p/294/295/302/372/373/520	FAM13C1	10116	4
miR-93.hd/291-3p/294/295/302/372/373/520	RBBP6	10116	5
miR-27	FOXJ3	9606	4
miR-1/206	COL4A3	9615	4
miR-30-5p	CCDC97	9615	4
miR-144	SACM1L	9615	4
miR-409-3p	PPP1CB	9031	5
miR-30-5p	KLHL20	9031	10
miR-30-5p	ANKRA2	10116	8
miR-129-5p	TCF20	10090	10
miR-145	FLJ20273	10116	4
miR-138	EIF3S1	9606	4
miR-141/200a	NR2C2	9031	5
miR-335	DDX3X	10090	4
let-7/98	KIAA1305	9615	4
miR-299-3p	PAXIP1	9615	4
miR-10	NCOA6	10116	5
miR-18	PDE4D	10116	5
miR-493-5p	DNAJC13	9615	4
miR-7	PLAGL2	10116	4
miR-30-5p	FLJ31818	9031	5
miR-377	ZEB2	10090	5
miR-15/16/195/424/497	WAPAL	9615	5
miR-186	LIN54	9615	4
miR-15/16/195/424/497	TMEM55A	9615	5
miR-205	AXIN2	10116	5
miR-30-5p	CCDC131	9031	5
miR-505	YPEL5	10116	5
miR-27	C1orf9	9606	4
miR-140	TP53INP2	10116	4
miR-200bc/429	C10orf56	9606	5
miR-149	HSPB6	9615	4
miR-204/211	GABBR2	9615	4
miR-30-5p	GOSR2	10116	4
miR-125/351	GAB4	9606	4
miR-17-5p/20/93.mr/106/519.d	SMAD7	9031	5
miR-214	PLCB4	9615	4
miR-485-3p	ZIC5	9615	8
let-7/98	LRFN4	10116	4
miR-495	KIF5C	10116	4
miR-329	ARID1A	9615	5
miR-130/301	NAP5	10116	5
miR-485-3p	KIAA1219	10116	4
miR-125/351	RBM38	9615	5
miR-93.hd/291-3p/294/295/302/372/373/520	RASSF2	9615	4
miR-493-5p	TBX18	9606	4
miR-493-5p	PPP1R10	10090	4
miR-29	SMARCC1	10090	4
miR-183	NEFL	10116	4
miR-199	JPH3	10116	4
miR-138	JMJD3	10090	8
miR-370	HNRPAB	9615	4
miR-1/206	QKI	9606	4
miR-29	CAV2	10116	4
miR-363	KCNA1	9615	4
miR-15/16/195/424/497	SOX5	10116	5
miR-15/16/195/424/497	RP11-130N24.1	10090	4
miR-493-5p	RAI1	9615	4
miR-200bc/429	PTBP1	10116	5
miR-183	METAP2	9615	4
miR-141/200a	HIC2	9615	5
miR-140	USP34	9031	5
miR-149	REPS2	9615	4
miR-495	JMJD1C	9031	5
miR-204/211	THRAP2	9615	4
miR-186	RABIF	10116	4
miR-503	FRY	9031	5
miR-204/211	CHP	9606	4
miR-205	PSD4	10116	4
miR-93.hd/291-3p/294/295/302/372/373/520	CPEB1	9615	5
miR-15/16/195/424/497	KIF5A	9606	4
miR-93.hd/291-3p/294/295/302/372/373/520	PCDHAC2	10090	4
miR-101	ABCA1	10116	4
miR-495	RND3	10090	4
miR-27	AMOTL1	9615	4
miR-218	FBXO41	10116	4
miR-491	SCRT1	9615	4
miR-323	COL11A2	10090	4
miR-182	MECP2	9615	4
miR-1/206	SLC31A1	9615	4
miR-204/211	ELAVL2	10090	4
miR-129-5p	NIPBL	9606	5
miR-200bc/429	SERF2	9615	4
miR-27	SP1	9615	4
miR-30-3p	GALNT1	10116	4
miR-182	PTP4A1	9031	5
miR-10	GALNT1	9615	5
miR-17-5p/20/93.mr/106/519.d	EIF4H	10090	4
miR-329	PCDHA4	10090	4
miR-141/200a	MTPN	9615	5
miR-204/211	C13orf1	9615	4
miR-27	EFHA2	10090	4
miR-130/301	BTBD3	10116	5
miR-138	IQSEC2	9615	4
miR-125/351	FLOT2	10090	4
miR-223	ZNF148	10090	4
miR-331	TMEM28	10116	4
miR-155	LRP1B	9615	5
miR-370	TMEM47	10090	4
miR-410	POLS	9606	5
let-7/98	ELF4	9606	4
miR-30-5p	PRLR	9606	4
miR-365	SOX6	9615	5
miR-218	RNF139	9031	5
miR-218	EIF3S1	9615	5
miR-155	KIAA1267	10116	5
miR-204/211	CENTD1	10116	4
miR-30-5p	PPP3CA	10090	10
miR-323	CSNK2A2	10116	5
miR-140	TAF5	9606	4
miR-17-5p/20/93.mr/106/519.d	HECA	9606	4
miR-493-5p	BMI1	9606	5
miR-29	PMP22	10116	5
miR-30-5p	TNRC15	10116	5
miR-22	KCNJ13	9615	4
miR-30-5p	DEXI	9615	4
miR-27	KIAA1012	9615	4
miR-503	UNC13A	10090	4
miR-362	PAN3	9615	4
miR-30-5p	MAP2	10116	4
miR-24*	ARHGEF2	9606	4
miR-485-3p	CNOT6	10116	4
miR-29	FEM1B	9031	5
miR-410	CUL5	10116	4
miR-542-3p	HIAT1	10116	4
miR-493-5p	AKAP1	9615	5
miR-495	CAMK2A	10116	4
miR-182	PBX2	10090	8
miR-101	ID4	10116	5
miR-499	CSNK1G1	9615	4
miR-17-5p/20/93.mr/106/519.d	RNF6	9031	5
miR-382	NEGR1	10116	4
let-7/98	CHRD	9606	4
miR-186	TOB1	9615	4
miR-27	MBNL2	10116	4
miR-17-5p/20/93.mr/106/519.d	CFL2	10090	9
miR-138	SOCS6	10116	5
miR-323	HSPA12A	10116	4
miR-148/152	C18orf25	10116	9
miR-30-5p	GOLGA4	10090	5
miR-193	CALM1	10116	5
miR-17-5p/20/93.mr/106/519.d	HLF	9606	5
miR-409-3p	SHB	9606	4
miR-196	SAPS2	9615	4
miR-186	IQWD1	10116	4
miR-150	ITSN1	10116	5
miR-214	GALNT7	10090	4
miR-382	HIATL1	10090	4
miR-10	SNX4	10090	4
miR-200bc/429	CFL2	9615	5
miR-129-5p	CREBZF	9615	4
miR-365	SEMA5B	9606	4
miR-218	AP2A1	9606	4
miR-200bc/429	SOX1	10090	5
miR-7	MECP2	9615	4
miR-146	IRAK1	9606	8
miR-335	FAM116A	10116	4
miR-200bc/429	PTPRZ1	10116	4
miR-200bc/429	BMI1	10090	5
let-7/98	WNT1	9615	4
miR-204/211	TMEM64	10116	5
miR-30-3p	TEAD1	9606	9
miR-144	MAPK6	10116	10
miR-17-5p/20/93.mr/106/519.d	BHLHB3	9606	9
miR-1/206	VEZF1	9615	5
miR-145	LARP5	10116	4
miR-7	TBC1D10B	10116	4
miR-486	GOLGA3	9606	4
miR-141/200a	DUSP3	9615	4
miR-182	TMEM50B	9615	4
miR-410	MYLIP	10116	4
miR-485-3p	CD2AP	9615	4
miR-186	RNF38	9031	5
miR-182	NRCAM	10116	5
miR-493-5p	UBE2Q1	9606	4
miR-148/152	NAT14	10090	4
miR-140	ETV3	9615	4
miR-1/206	CDK6	10116	4
miR-181	FLJ20160	9615	4
miR-495	XYLT1	10116	5
miR-1/206	FAM91A1	9615	5
miR-299-5p	CPEB1	9606	5
miR-1/206	TGIF2	10090	4
miR-1/206	N-PAC	9615	4
miR-505	PDE4B	10116	4
miR-182	KLHL2	10116	4
miR-125/351	ANTXR2	10116	5
miR-181	IGF2BP3	9615	5
miR-129-5p	PLAGL2	9615	4
miR-181	ADRBK1	10116	4
miR-410	ARPP-19	9615	4
miR-30-5p	ADAMTS3	10090	5
miR-29	C5orf13	9031	5
miR-200bc/429	RANBP9	10116	5
miR-377	CARTPT	10090	4
miR-223	EBF2	10090	4
miR-331	DNAJB5	9615	4
miR-27	SEMA4F	9615	4
miR-146	PHOX2B	10116	5
miR-30-5p	MGC42367	9615	4
miR-410	TIAM1	9606	5
miR-329	HIPK1	9615	8
miR-138	ZNF385	10090	4
miR-323	NFIX	9615	4
miR-28	C1orf113	10090	4
miR-27	TOX	9615	5
miR-204/211	PAX2	9615	4
miR-18	MAP7D1	10116	4
miR-125/351	MEGF8	9606	4
miR-182	PHF15	9615	5
miR-125/351	QKI	9615	5
miR-30-5p	GOT2	9606	4
miR-186	ENC1	9606	4
miR-376	ZMYND11	10116	4
miR-137	TLE4	9606	4
miR-141/200a	LPP	10116	5
miR-214	UMOD	9606	4
miR-331	PHLPP	10116	4
miR-155	SOX6	9615	4
miR-17-5p/20/93.mr/106/519.d	FGD5	9615	5
miR-10	TBX5	10090	4
let-7/98	GGA3	10116	4
miR-299-3p	XKR7	9606	4
miR-376	VHLL	10116	4
miR-129-5p	MYT1L	9606	5
miR-93.hd/291-3p/294/295/302/372/373/520	GATAD2B	9615	8
miR-214	KLC2	9615	4
miR-493-5p	MARK1	9031	5
miR-17-5p/20/93.mr/106/519.d	P2RX4	9606	4
miR-485-3p	ENY2	9615	4
let-7/98	ARRDC4	9615	4
miR-145	NSUN4	9615	4
miR-93.hd/291-3p/294/295/302/372/373/520	E2F7	9606	9
miR-329	SLC23A2	10090	4
miR-329	PHF6	9615	4
miR-29	KLHL28	9031	5
miR-30-5p	HNT	10116	4
miR-149	PTGIR	9606	4
miR-15/16/195/424/497	WIPI2	9606	5
miR-505	SLC25A3	9615	4
miR-30-5p	RUNX2	9606	14
miR-15/16/195/424/497	PPM1E	10090	5
miR-204/211	FBN2	10116	5
miR-93.hd/291-3p/294/295/302/372/373/520	FAM46C	10116	4
miR-362	C14orf4	9615	5
miR-200bc/429	MSL2L1	10116	4
miR-140	IGFBP5	10116	5
miR-1/206	MATR3	9606	5
miR-30-3p	SEMA3C	10090	4
miR-30-5p	IER2	9615	4
miR-141/200a	OLIG3	9615	5
miR-129-5p	HDGF	9615	4
miR-505	LEF1	10090	4
miR-505	HMGB2	10116	4
miR-378	SAP30L	10116	4
miR-155	PSKH1	9606	4
miR-503	DNAJA2	10116	5
miR-30-5p	LARP1	9031	5
miR-182	RP11-493K23.2	10090	4
miR-376	CDR2	9615	4
miR-186	TBCEL	10090	4
miR-141/200a	PTEN	10090	9
miR-129-5p	HOXC4	9606	4
miR-29	FOXO3A	9031	5
miR-370	TPM4	10116	4
miR-495	SENP6	9615	5
miR-182	EFNB2	9031	5
miR-93.hd/291-3p/294/295/302/372/373/520	KIAA1267	10116	4
miR-199	CBL	9615	4
miR-376	SGMS1	10116	4
miR-378*	RBBP5	10116	4
miR-335	LONRF1	10116	4
miR-505	NRCAM	10090	5
miR-144	MMP15	9606	4
miR-30-5p	GOLGA1	10090	5
miR-30-5p	FOXD1	9031	5
miR-7	ZNF395	9615	5
miR-410	MBNL2	10116	5
miR-15/16/195/424/497	SLC24A3	9031	5
miR-29	WDFY3	10116	5
miR-1/206	RIMS4	10116	4
miR-193	MCL1	9606	4
miR-144	TOP1	9615	5
miR-542-3p	SYS1	9615	4
miR-27	HMGCS1	9606	4
miR-455	PAPOLG	9031	5
miR-495	PCDHAC2	9606	4
miR-185	RHOA	9606	4
miR-542-3p	RIC3	10116	4
miR-140	RAGE	10116	4
miR-130/301	C15orf29	9615	5
miR-17-5p/20/93.mr/106/519.d	SH3PXD2A	10116	5
miR-150	BET1	9615	4
miR-27	ACE	10116	4
miR-503	IHH	10116	4
miR-27	LYPD3	9606	4
miR-186	KCNA1	10116	4
miR-186	NHN1	9615	4
miR-323	ATP6V1E1	9606	4
miR-181	RORB	9615	5
miR-30-5p	PHF6	10116	4
miR-15/16/195/424/497	MIB1	10116	4
miR-200bc/429	SESN1	9615	5
miR-218	PHF16	9606	4
miR-129-5p	ZFP36L1	10090	9
miR-30-5p	PALM2	9031	5
miR-186	LRRN1	10116	4
miR-185	IGF2R	9615	4
miR-181	FAM46A	9615	4
miR-329	CADM1	10090	4
miR-188	H3F3B	9615	5
miR-196	NRK	9615	4
miR-182	C8orf13	9615	8
miR-141/200a	FLJ31951	9615	4
miR-299-5p	CHSY1	10116	4
miR-125/351	ZDHHC7	10116	4
miR-204/211	BCL9	9615	5
miR-30-5p	NAV1	9606	4
miR-410	KCNJ2	10116	4
miR-377	SLC11A2	9615	4
miR-148/152	ERRFI1	9615	5
miR-93.hd/291-3p/294/295/302/372/373/520	MBNL2	9606	4
miR-101	CXorf23	9615	4
miR-200bc/429	APPL1	9606	4
miR-30-5p	DOLPP1	10090	8
miR-485-5p	MEF2D	10116	4
miR-378	LOC606495	10090	4
miR-138	SRGAP2	9615	4
miR-214	AMMECR1L	10090	4
miR-186	NRP1	9031	5
miR-370	MARCKS	9606	5
miR-30-5p	2008-03-04	10116	4
miR-130/301	ERBB2IP	9615	5
miR-30-3p	ELK3	10090	4
miR-205	CHN1	9031	10
miR-376	CBFB	9606	4
miR-144	RNF38	9615	5
miR-183	TTC7B	10090	5
miR-181	PCAF	9615	5
miR-363	HSF5	9615	4
miR-182	VAV2	10116	4
miR-378*	PRICKLE2	9606	4
miR-27	MARCKS	9615	5
miR-505	CYP46A1	9615	4
miR-125/351	ZNF281	9615	5
miR-17-5p/20/93.mr/106/519.d	ATP1A2	9615	4
miR-493-5p	OSBPL8	10090	4
miR-17-5p/20/93.mr/106/519.d	ANKFY1	9606	9
miR-378	PDE4D	10116	5
miR-137	ANKRD38	10116	4
miR-329	BCL11B	10116	5
miR-130/301	C16orf70	10090	5
miR-7	SEC24C	9606	4
miR-93.hd/291-3p/294/295/302/372/373/520	RNF38	10116	4
miR-299-5p	NAV3	9031	5
miR-101	ARID5B	9606	5
miR-27	BAGE4	9606	5
miR-200bc/429	ARPP-21	9615	4
miR-495	ONECUT2	9606	12
miR-15/16/195/424/497	LY6E	9615	4
miR-101	GRM1	9615	4
miR-199	SLC25A13	9606	4
miR-205	RBM9	9606	4
miR-93.hd/291-3p/294/295/302/372/373/520	PCDHA12	10116	4
miR-410	BCL9L	9615	4
miR-140	ANK2	9615	8
miR-370	SOX12	10116	4
miR-299-5p	KLF9	10116	4
miR-148/152	ARRDC3	9615	9
miR-27	ZNF536	10090	4
miR-30-5p	PAPOLA	9615	5
miR-204/211	NXPH1	10116	4
miR-141/200a	MATR3	9606	4
miR-204/211	NR4A2	9615	4
miR-1/206	DDX17	9606	5
miR-370	KIAA1274	10090	4
miR-27	MLL	10090	4
miR-27	TNPO1	9031	15
miR-141/200a	FLJ42117	10116	4
miR-144	ABTB2	9615	4
miR-148/152	VSNL1	10116	4
miR-186	SUMO1	10116	4
miR-378	KIAA1324L	10090	5
miR-365	LAMP2	10090	4
miR-323	KIAA1804	9606	4
miR-1/206	MMD	10116	14
miR-30-5p	C15orf29	9031	5
miR-182	DMXL1	9606	4
miR-182	DLG2	10090	4
miR-18	ODZ3	9615	5
miR-145	PFTK1	10116	4
miR-410	ITPKB	10090	5
miR-30-5p	DAG1	10116	4
miR-491	BCL2L1	9615	4
miR-181	MAPT	10116	4
miR-495	CDYL2	9606	4
let-7/98	C1orf26	10116	4
miR-182	GEMIN8	9606	4
miR-137	WNT7A	10116	5
miR-542-3p	SFRS1	9615	9
miR-505	NDFIP1	10116	5
miR-27	MFHAS1	9615	4
miR-409-5p	PDE4D	9606	5
miR-125/351	PLAGL1	10116	4
miR-130/301	FLJ45187	9615	19
miR-101	ZNF533	10116	5
miR-130/301	EDA	9606	5
miR-144	LOC284274	10116	4
miR-137	VTI1A	10090	5
miR-182	ZCCHC11	10090	5
miR-193	DNAJC13	10090	5
miR-101	PTX3	10116	4
miR-181	DKFZp667G2110	10116	4
miR-185	C10orf83	9615	4
miR-145	ETS1	10116	5
miR-130/301	CLTC	9606	5
miR-370	ZC3H12B	10090	4
miR-181	DUSP10	9031	5
miR-204/211	PCDH9	9606	4
miR-130/301	NOL4	10116	5
miR-410	SLC8A1	10116	4
miR-144	NDRG3	9606	4
miR-493-5p	ARID4B	9031	5
miR-30-5p	SMAP1L	10090	4
miR-181	NOVA1	10116	10
miR-410	ZCCHC11	10116	5
miR-204/211	EEF1E1	9031	5
miR-144	GCNT2	10090	4
miR-214	PGF	9606	8
miR-185	DAB2IP	9606	4
miR-379	SLC20A1	10116	4
miR-155	RNF111	10090	5
miR-18	PACSIN1	9615	4
miR-495	REV3L	9615	5
miR-15/16/195/424/497	ESRRG	9031	5
miR-378	GHR	9615	4
miR-542-3p	DCBLD2	9615	4
miR-24*	UBE2D1	9615	4
miR-138	CACNA1A	9606	4
miR-18	LOC399947	10090	4
miR-410	ADIPOR2	10116	5
miR-150	TCF12	9615	4
miR-205	GPD2	10116	4
miR-323	RAI14	9615	5
miR-144	CAMTA1	9615	8
miR-379	ARIH2	9615	4
miR-137	CAPN2	9615	4
miR-130/301	DIAPH3	10116	4
miR-30-5p	ZRANB2	9615	4
miR-146	KCTD15	10116	4
miR-214	GARNL4	9606	4
miR-495	CDC14A	10090	4
miR-181	ARL3	10090	4
miR-493-5p	SPRED2	9615	5
miR-365	ARMCX3	10116	4
miR-30-5p	ABL1	9615	4
miR-223	PCTK2	9615	5
miR-17-5p/20/93.mr/106/519.d	LRIG1	9031	5
miR-93.hd/291-3p/294/295/302/372/373/520	PCDHA8	9615	4
miR-495	PAIP1	9606	6
miR-370	PRKACA	10116	4
miR-15/16/195/424/497	HTR4	9606	4
miR-144	UBE4A	9615	4
miR-495	PCMT1	9606	4
miR-125/351	PHF15	9606	8
miR-138	KIAA0143	10090	4
miR-505	AHR	10116	4
miR-542-3p	ZFHX4	10090	5
miR-499	POU4F2	10116	4
miR-144	TMED5	9615	7
miR-29	MED12L	9031	5
miR-505	CPEB2	10090	5
miR-150	HNRPU	10116	4
miR-200bc/429	RGL1	9606	4
miR-22	DNAJB5	9606	4
miR-323	CCNG1	9615	4
miR-199	CLIP1	9615	5
miR-27	TNRC6B	10090	4
let-7/98	SYT1	9615	5
miR-214	ESRRA	10090	4
miR-136	KIAA1005	10090	5
miR-331	FAM108A1	9615	4
miR-15/16/195/424/497	MYBL1	9615	10
miR-93.hd/291-3p/294/295/302/372/373/520	DNAJA2	9031	5
miR-29	JARID1C	10116	4
miR-30-3p	DTD1	10090	4
miR-29	AHR	9615	4
miR-29	SMEK2	9606	5
let-7/98	RP11-50D16.3	9606	4
miR-410	ELMO2	9615	4
miR-205	SLC35B3	9615	4
miR-378*	DAZ3	9606	4
miR-27	ADCY3	10116	4
miR-335	VAV2	10090	4
miR-144	ARHGAP26	10116	8
miR-144	RAB14	10116	4
miR-182	GK	9615	4
miR-28	USP9X	10090	4
miR-149	ZBTB4	10116	4
miR-10	TNRC6B	10116	5
miR-22	THPO	10116	4
miR-15/16/195/424/497	PTPN3	9615	5
miR-15/16/195/424/497	ARHGAP5	10116	5
let-7/98	KIAA1147	9615	4
miR-30-3p	COLEC12	10090	5
miR-365	DCUN1D4	10090	4
miR-30-5p	SOX4	9615	4
miR-17-5p/20/93.mr/106/519.d	ST8SIA4	10116	4
miR-30-3p	HIRA	10090	4
let-7/98	MON2	10116	5
miR-148/152	C10orf6	10116	4
miR-193	CAMK2N2	9606	4
miR-329	ANKRD17	9606	5
miR-149	SERF2	10116	4
miR-205	OPRS1	10090	4
miR-136	JAZF1	9615	4
miR-182	2008-09-07	9615	5
miR-7	LSM12	9606	8
miR-148/152	DCP2	9615	4
miR-149	FBXL16	9606	8
miR-204/211	YTHDF3	10090	8
miR-335	TRIM59	10116	4
miR-485-3p	GNB1	9615	5
miR-137	BACH2	10090	9
let-7/98	CPA4	10116	4
miR-130/301	SAPS3	9606	4
miR-181	ROBO2	10116	5
miR-299-5p	CALCR	9606	4
miR-324-5p	GON4L	10116	4
miR-15/16/195/424/497	CEP350	10090	4
miR-204/211	TGFBR2	10116	4
miR-181	ST8SIA4	10090	5
miR-30-3p	NR3C1	10116	4
miR-205	CUEDC2	10116	4
miR-141/200a	CSNK2A1	9031	5
miR-30-3p	BACE1	9606	4
let-7/98	NUMBL	9615	4
miR-181	GPM6A	9615	4
miR-15/16/195/424/497	SPRY4	10116	4
miR-331	ASXL1	9615	4
miR-299-5p	ABCD3	9606	4
miR-148/152	TNXB	9606	4
miR-410	SMAD7	10116	4
miR-138	XRN1	10116	4
miR-30-3p	SIAH1	10090	5
miR-410	NRF1	9615	4
miR-181	CENTB2	9606	8
miR-15/16/195/424/497	ARMCX2	9615	4
let-7/98	CROP	9615	5
miR-329	RAI1	10116	10
miR-7	EPHA3	9615	4
miR-27	LPIN1	9615	5
miR-363	NCOA1	9615	4
miR-188	C14orf130	9606	4
miR-130/301	SPRED1	9031	5
miR-30-5p	CADPS	9606	4
miR-144	WDFY3	9606	4
miR-181	LBR	10116	4
miR-140	RKHD2	9615	4
miR-493-5p	PCNX	10090	4
miR-29	LYSMD1	9606	4
miR-191	FOXP1	10090	4
miR-377	HOXB8	10090	4
miR-29	RAPGEFL1	9615	4
miR-138	DCP1A	10116	5
miR-409-3p	MTX3	9606	4
miR-10	ARHGAP12	10090	4
miR-130/301	RBM33	9606	4
miR-485-5p	MIER2	10090	4
miR-377	BIN1	10090	4
miR-130/301	TSPYL2	9606	4
miR-148/152	ZADH2	9615	5
miR-138	PAPPA	10116	5
miR-218	ZNF609	9615	4
miR-542-3p	PDE4D	10116	4
miR-323	CTNNBIP1	9606	4
miR-181	FOXK1	9606	5
miR-30-3p	GAS2	9615	4
miR-101	IKZF4	9615	8
miR-204/211	WEE1	9606	4
miR-146	MMP16	10116	9
miR-200bc/429	ZMYM4	9615	5
miR-101	ANUBL1	9606	4
miR-410	CTAGE1	9615	4
miR-204/211	VASP	9606	4
miR-181	YWHAG	9606	5
miR-1/206	C9orf82	10116	4
miR-200bc/429	ZNF532	9615	9
miR-200bc/429	SFRS10	9615	4
miR-485-3p	SNPH	9615	4
miR-15/16/195/424/497	STX1A	10116	4
miR-299-5p	SAPS3	10116	5
miR-30-3p	LOC128977	9615	4
miR-125/351	DIO2	10116	4
miR-204/211	PRRX1	10090	4
let-7/98	IL13	9606	4
miR-495	ABHD13	10116	4
miR-185	PHLDB1	10116	4
miR-182	C16orf70	9615	5
miR-223	C16orf69	10116	4
miR-140	VAMP3	10090	4
miR-218	VAT1	10090	8
miR-323	TRMT5	9606	5
miR-146	THRAP1	10090	4
miR-141/200a	FRMD6	10116	4
miR-363	GTF2H1	10116	4
miR-93.hd/291-3p/294/295/302/372/373/520	TAL1	9606	4
miR-27	ABCB9	9615	4
miR-27	ITSN2	9031	5
miR-181	EIF4A2	9606	5
miR-15/16/195/424/497	SPRED1	10090	4
miR-410	SETD5	10116	4
miR-29	PRKRA	9615	4
miR-15/16/195/424/497	NFE2L1	10116	5
miR-93.hd/291-3p/294/295/302/372/373/520	SYNC1	9615	5
miR-377	FAT2	10116	4
miR-186	LRCH2	10090	4
miR-125/351	BCL9L	9615	4
miR-137	GDF6	9615	4
miR-155	C21orf66	10090	4
miR-10	HNRPK	9615	4
miR-214	TAOK1	9606	4
miR-183	SLC44A1	9615	4
miR-181	CCDC6	9606	4
miR-30-5p	MAP4K4	9031	5
miR-15/16/195/424/497	DACH1	9606	4
miR-409-3p	ATP6V1C2	9606	4
miR-145	SET	9615	5
miR-17-5p/20/93.mr/106/519.d	PAPOLA	10116	5
miR-299-5p	NSMAF	9031	5
miR-137	DEXI	10116	4
miR-125/351	C14orf130	10090	4
miR-299-3p	PDLIM2	10090	4
miR-144	SNF1LK2	10090	4
let-7/98	PPTC7	9615	5
miR-505	HMG20A	10116	4
miR-30-5p	SETD7	10090	5
miR-141/200a	PCDH8	10090	4
miR-148/152	IL13RA1	10116	4
miR-101	ELF5	9606	4
miR-140	SYT6	10090	5
let-7/98	ANGPTL2	9606	5
miR-145	CSMD3	9615	5
miR-181	WDR37	10116	5
miR-130/301	SNX27	10116	4
miR-27	BCDIN3	10116	4
miR-129-5p	CNTN4	9031	5
miR-409-5p	CELSR3	9615	4
miR-148/152	BAZ2A	10116	4
miR-144	MARCKSL1	9606	4
miR-27	PTPN9	9606	4
miR-182	NTN4	10116	4
miR-129-5p	AMOTL2	9615	4
miR-30-5p	PHF16	9031	5
miR-93.hd/291-3p/294/295/302/372/373/520	CRK	10116	5
miR-505	FAM13C1	9606	4
miR-214	PUNC	10090	4
let-7/98	FNDC3B	9615	10
miR-218	SNF1LK2	9031	10
miR-185	SETD5	9615	4
miR-17-5p/20/93.mr/106/519.d	CAMTA1	9615	5
miR-505	KIAA0182	9606	4
miR-491	CALCOCO1	9615	4
miR-17-5p/20/93.mr/106/519.d	SMAD6	9615	5
miR-27	CDH5	10090	4
miR-200bc/429	GABBR2	9606	5
miR-146	NPAS4	9615	4
miR-183	RAB8B	10116	4
let-7/98	RDX	10116	5
miR-29	BAK1	9606	4
miR-125/351	PCGF6	9606	4
miR-125/351	ACVR2A	10116	5
let-7/98	KIF2A	10090	4
miR-196	EPC2	9031	5
miR-185	SPATA2	10116	4
miR-204/211	SLC23A2	9615	4
miR-15/16/195/424/497	NRP2	9031	6
miR-29	GAS7	9615	4
miR-503	SMURF2	9031	5
miR-10	FIGN	10116	5
miR-365	ANKRD17	9606	5
miR-183	THSD7B	9031	5
miR-137	MIB1	9615	4
miR-101	LOC284274	9615	4
miR-15/16/195/424/497	DDX3X	9615	5
miR-30-3p	VAMP2	10090	4
miR-186	C4orf35	9615	4
miR-214	APOBEC2	10090	4
miR-495	SLC25A26	9031	5
miR-27	EPHA4	10090	4
miR-145	ST18	9615	4
let-7/98	SLC25A18	10090	4
miR-136	INOC1	10090	5
miR-181	DOCK10	10090	4
miR-18	SHOX2	10116	4
miR-137	PKN2	10116	5
miR-365	CASC4	10090	4
miR-27	RNF144	10116	5
miR-141/200a	SNAP23	9606	4
miR-181	INPP5E	9606	4
miR-145	CABP1	9615	5
miR-17-5p/20/93.mr/106/519.d	RAB11FIP1	10090	4
miR-323	C14orf4	9606	5
miR-365	YWHAH	10116	4
miR-204/211	KCNJ1	10116	4
miR-30-5p	DIO2	10090	4
miR-27	ORC5L	9615	5
miR-200bc/429	LEMD3	9615	4
miR-382	ATP8B1	10116	4
miR-29	TDG	9606	4
miR-130/301	ROBO2	9031	5
miR-28	SNX27	9615	4
miR-22	DNAJC7	9615	4
miR-503	CHD9	10090	5
miR-214	ARHGAP26	9615	4
miR-17-5p/20/93.mr/106/519.d	DLC1	9615	4
miR-379	C9orf7	9615	4
miR-186	REPS2	10116	4
miR-503	SYT3	10116	4
miR-29	FOXJ2	10116	4
miR-495	PCDHA12	9615	4
miR-196	MGC61598	10090	4
miR-181	ZFAND6	10116	10
miR-137	TSNAX	10090	4
miR-370	FAM76B	10090	4
miR-299-5p	CACNB4	10116	5
miR-155	CUGBP2	9615	4
miR-196	WDR37	10116	5
miR-204/211	MRVI1	10116	4
miR-493-5p	GBF1	10090	4
miR-365	UBP1	9606	5
miR-218	SMPD3	9031	5
miR-93.hd/291-3p/294/295/302/372/373/520	CREBL1	10116	4
miR-542-3p	CDX2	10090	4
miR-18	MBNL2	9615	4
miR-323	CHCHD4	10116	4
miR-1/206	MYO1E	9615	4
miR-140	MMD	9031	5
miR-223	AEBP2	10090	5
miR-93.hd/291-3p/294/295/302/372/373/520	PRR16	9606	5
miR-505	SEMA6D	9615	5
miR-149	NAV2	9615	4
miR-410	DOCK8	9615	4
miR-378	HOOK3	10090	4
miR-218	RAB8B	10116	5
miR-410	ZNF148	9031	10
miR-141/200a	PLCXD3	9615	4
miR-141/200a	FOXA2	9615	4
miR-410	TNFRSF10B	10090	4
miR-125/351	TSPAN12	10116	4
miR-101	KLF12	9615	4
miR-93.hd/291-3p/294/295/302/372/373/520	DDHD1	9606	5
miR-335	PPP1R9B	9606	4
miR-186	NCK2	9606	4
miR-1/206	MAP1A	9615	4
miR-200bc/429	POLK	9615	4
miR-505	BTBD3	10090	5
miR-155	MAP3K14	9615	4
miR-130/301	ITPKB	9615	5
miR-30-5p	BNC2	10116	5
miR-27	VDAC3	9615	4
miR-218	GPAM	9615	8
miR-17-5p/20/93.mr/106/519.d	RBL2	9031	10
miR-130/301	ACSL4	10090	9
miR-15/16/195/424/497	AKT3	9031	6
miR-495	BCL2L1	10116	4
miR-27	ZNF385	10090	4
miR-193	ALKBH5	9606	4
miR-141/200a	STAT5A	9606	4
miR-101	TFAP4	9606	4
miR-30-5p	USP37	9606	4
miR-27	MAGI2	10116	5
miR-145	SLC1A2	10116	5
miR-18	CLASP2	10116	4
miR-455	CROP	10116	5
miR-144	RALGPS1	10116	4
miR-218	MEGF9	10116	4
miR-493-5p	IRX3	9615	4
miR-138	USP47	9606	5
miR-150	NR2F2	9615	4
miR-181	MKNK2	10116	4
miR-410	SLC35D3	9615	4
miR-93.hd/291-3p/294/295/302/372/373/520	INTS6	9606	5
miR-485-5p	ARMC1	10090	4
miR-29	FAM70A	9606	4
miR-93.hd/291-3p/294/295/302/372/373/520	BCL2L11	10116	4
miR-377	CRK	10116	4
miR-29	SMCR7L	9606	4
miR-181	HNRPK	10116	5
miR-17-5p/20/93.mr/106/519.d	FRS2	9615	9
miR-101	CDK6	9615	4
miR-495	GALNT1	9606	5
miR-185	TMEM24	9615	4
miR-138	SNCB	9031	5
miR-542-3p	CC2D1B	9615	4
miR-17-5p/20/93.mr/106/519.d	FBXW11	9615	5
miR-379	INSR	10116	5
miR-495	ACTA1	9615	4
miR-200bc/429	ST6GALNAC5	10116	4
miR-376	PHF21B	10116	4
miR-129-5p	CLEC2D	10090	9
miR-181	CDON	10116	5
miR-144	ANKRD11	10116	5
miR-199	SLC24A3	10090	10
miR-329	IBRDC3	10116	4
miR-1/206	EIF4E	9031	5
miR-137	SNF1LK	9606	10
miR-331	CPSF2	10116	4
miR-130/301	IQGAP2	9615	5
miR-323	GPM6A	9606	4
miR-27	ZNF609	10090	4
miR-30-5p	STK35	9606	8
let-7/98	LEPROTL1	9615	5
miR-149	DUSP16	9615	4
miR-409-3p	ELOVL4	9615	4
miR-30-5p	DMXL2	9615	4
miR-29	LUZP1	10116	4
miR-218	RAPGEF5	9615	4
miR-28	TRIT1	10116	4
miR-101	TIMP3	9606	4
miR-204/211	MTMR4	9606	4
miR-27	MGC40405	9615	5
miR-493-5p	CPEB2	9615	5
miR-144	C1orf77	9615	4
miR-493-5p	SMG1	10116	9
miR-182	C6orf134	10116	4
miR-145	FBXL10	10116	4
miR-182	SLC38A4	9606	4
miR-210	MLL2	10090	4
miR-30-5p	GRIA2	10116	5
let-7/98	COL4A2	10116	5
miR-30-3p	JMJD3	10116	4
miR-27	PRKY	10116	5
miR-410	ZC3H7B	9615	4
miR-137	MTPN	10090	9
miR-24*	LSM14A	9615	5
miR-22	KIAA0427	10116	4
miR-204/211	TRPM3	9615	5
miR-377	MTMR3	10116	5
miR-30-3p	HMGA2	9615	5
miR-17-5p/20/93.mr/106/519.d	FAM45A	10116	4
miR-30-5p	CELSR3	10090	12
miR-205	ZHX3	10116	4
miR-17-5p/20/93.mr/106/519.d	M6PR	10116	4
miR-378*	C1orf21	10116	4
miR-130/301	FAM73A	9615	4
miR-125/351	SGPL1	10116	4
miR-193	CCNT2	10116	4
miR-138	ZBTB4	10116	4
miR-299-3p	NOPE	10090	4
miR-199	CELSR1	9606	10
miR-331	HES7	9615	4
miR-485-3p	SP1	10116	4
miR-182	FBXL10	9615	5
miR-323	DOCK3	9606	4
miR-335	ABCC5	9606	4
miR-329	MYT1	10116	4
miR-17-5p/20/93.mr/106/519.d	REEP3	9615	4
miR-485-5p	PHF21A	10116	5
miR-125/351	TRIB2	10116	5
miR-323	RBPMS2	9031	5
miR-205	MAPK3	9615	4
miR-129-5p	GRB14	9031	5
miR-125/351	SUV39H1	10116	4
miR-495	PCDHA10	10116	4
miR-130/301	BAZ2A	10090	4
miR-299-5p	SMURF2	9606	4
miR-409-5p	CACNA2D2	9615	4
miR-495	CROP	9031	10
miR-15/16/195/424/497	TFAP4	9606	5
miR-188	RAB14	10116	4
miR-101	CBL	9615	4
miR-10	ARRDC3	9615	5
miR-145	PTGFR	10116	4
miR-136	MLL	9615	4
miR-130/301	ZHX1	9615	4
miR-410	OR51E2	10116	4
miR-148/152	PPP1CB	9615	5
miR-17-5p/20/93.mr/106/519.d	CNOT7	10090	5
miR-27	PARD6B	10090	5
miR-493-5p	ANKRD50	10090	5
miR-199	STX4	9606	4
let-7/98	ARL5A	10090	5
miR-493-5p	SLC30A7	10116	4
miR-148/152	GPATCH8	10090	4
miR-503	CDC27	10090	4
miR-495	ZFAND3	9606	5
miR-130/301	ESR1	10116	5
miR-29	EIF3S1	9615	4
miR-218	KIAA0323	10090	4
miR-15/16/195/424/497	TRAM1	10116	4
miR-199	ZCCHC2	9615	4
miR-29	SLC16A14	10116	4
miR-503	GLS2	9615	4
miR-181	TRPM3	10090	5
miR-129-5p	2008-03-05	9615	4
miR-29	ABBA-1	9615	4
miR-196	NOPE	9031	5
miR-29	MAP6	9031	5
miR-129-5p	KCTD1	9615	4
miR-377	EDNRB	9615	4
miR-125/351	VTCN1	10116	4
miR-299-5p	TMEM30A	9615	4
miR-205	ANK2	9031	5
miR-138	SENP7	9615	4
miR-149	ARPC4	9606	4
miR-29	NDST1	9606	4
miR-335	HIC2	9031	5
miR-218	SRP72	10116	4
miR-223	PLAGL2	10116	4
miR-125/351	KLC2	9606	4
miR-137	TRIM23	9615	4
miR-30-5p	GOLGA8A	10116	4
miR-183	DAP	9615	4
miR-200bc/429	RPS6KA2	9615	4
miR-181	BRD1	10116	5
miR-15/16/195/424/497	HMGA1	9615	6
let-7/98	GALE	10090	4
miR-29	FSTL1	9615	4
miR-365	PTPRM	10116	4
miR-455	HOXB6	10116	4
miR-410	DUSP10	9615	4
miR-455	DDX3X	9615	5
miR-30-5p	CA10	9615	4
miR-200bc/429	MGAT2	9615	8
miR-329	LHFPL3	9615	4
miR-485-5p	CROT	10116	4
miR-409-5p	ARID4B	10116	4
miR-27	CBLB	10116	5
miR-15/16/195/424/497	VAMP1	10116	4
miR-15/16/195/424/497	HOXA10	10116	5
miR-125/351	MIB1	9615	4
miR-27	SLC35A3	9615	4
miR-30-3p	ARFGEF1	10090	4
miR-130/301	SHANK2	9615	5
miR-186	RUFY3	10116	4
miR-29	DIAPH2	10116	4
miR-378	CNBP	9606	4
miR-329	WDFY1	9606	4
miR-182	SNX13	9615	4
miR-410	CASK	9606	5
miR-223	CYB5A	10116	4
miR-125/351	NEFM	10116	4
let-7/98	IKBKE	10090	4
miR-181	ADAMTS1	9606	4
miR-205	ERBB4	9615	4
miR-145	C1orf9	10090	5
miR-145	ZC3H11A	10090	4
miR-129-5p	FMR1	9615	5
miR-155	BOC	9606	4
miR-181	PCGF2	9615	4
miR-130/301	ZNF609	10116	4
miR-329	SPRED2	10090	5
miR-370	ARID4B	9606	5
miR-130/301	RAG1	9606	4
miR-486	PTPN12	10090	5
miR-431	TBX15	9615	4
miR-182	FOXF2	9615	9
miR-27	MAN2A1	10116	4
miR-299-5p	HIC2	9031	5
miR-431	AMIGO1	10116	4
miR-183	RAP2C	10090	5
miR-148/152	FLJ14213	10116	4
miR-101	PPP1R16B	9615	4
miR-503	OTP	9615	4
miR-493-5p	FBXO21	10116	4
miR-495	SNRPD1	10116	4
miR-378	SAMD4B	9615	4
miR-505	C20orf77	10116	4
miR-182	XPR1	10116	5
miR-495	CPEB2	9615	5
miR-495	HOXC6	9606	4
miR-542-3p	C1orf83	9615	4
miR-182	SS18L1	10116	4
miR-378	PGF	10090	4
miR-130/301	CHST1	9615	5
miR-495	ARHGEF12	10116	4
miR-141/200a	MBNL3	9031	5
miR-499	LOC138046	10116	4
miR-30-5p	BRWD1	9606	8
miR-495	LOC153222	9615	4
miR-505	ARPP-19	9606	4
miR-200bc/429	MAMDC1	10116	4
miR-7	ERLIN1	10116	4
let-7/98	DHX57	9615	4
miR-129-5p	ABCC5	9615	5
miR-155	RKHD3	9031	5
miR-155	CAMTA1	9606	5
miR-186	SENP6	10116	4
miR-93.hd/291-3p/294/295/302/372/373/520	LYCAT	9031	5
miR-188	PDE4A	10090	4
miR-129-5p	MAN1A1	9031	5
miR-138	CALN1	10090	4
miR-22	HPCAL4	10090	4
miR-186	DEK	9606	4
miR-93.hd/291-3p/294/295/302/372/373/520	RAB22A	10116	9
miR-218	PTPRM	10116	5
miR-27	SLC25A44	9615	4
miR-200bc/429	NAP1L5	9606	4
miR-93.hd/291-3p/294/295/302/372/373/520	MMP23B	9615	4
miR-138	MXD4	10116	4
miR-17-5p/20/93.mr/106/519.d	HIF1A	10116	4
miR-377	WHSC2	10090	4
miR-324-5p	LMX1A	10116	4
miR-125/351	MGC11102	10090	4
miR-199	FLJ20273	10090	4
miR-29	EPS15	10090	4
miR-138	KIAA1468	10090	5
miR-495	ZNF532	10116	10
miR-542-3p	ZC3H12B	9606	5
let-7/98	APBB3	9606	4
miR-200bc/429	OCLN	10116	4
miR-376	SP1	9615	4
miR-15/16/195/424/497	FCHSD1	10116	4
miR-199	ACVR2B	9606	4
miR-196	KCTD21	9606	4
miR-182	DAB2IP	9615	4
miR-30-5p	EML4	9615	4
miR-129-5p	LOC439985	10090	5
miR-137	E2F6	9615	4
miR-379	HBEGF	9615	4
miR-141/200a	DIXDC1	10090	4
miR-493-5p	RALGPS1	10116	4
miR-145	NAT13	10116	4
miR-499	LRRTM1	10090	5
miR-141/200a	ASTN1	9606	4
miR-485-3p	ZFPM2	10090	4
miR-30-5p	NCAM1	9606	10
miR-495	HTATSF1	9606	4
miR-499	EIF4A2	10116	5
miR-140	E2F3	9606	4
miR-136	SYTL4	9606	4
miR-15/16/195/424/497	RASSF5	9031	5
miR-1/206	GRIA3	10116	4
miR-145	THRAP1	10090	8
miR-186	SP4	9031	5
miR-204/211	FJX1	9615	4
miR-323	ARHGAP27	9615	4
miR-186	MYST3	10116	4
miR-493-5p	ZIC1	10090	8
miR-101	KPNA3	10116	5
miR-181	C14orf4	9606	4
miR-182	MAF	10116	9
miR-144	ZNF24	10116	4
let-7/98	ADIPOR2	10090	5
miR-214	KRTAP4-4	9615	4
miR-183	TLE4	10116	4
miR-486	SLC4A7	9615	4
miR-200bc/429	EDG2	10116	8
miR-101	DR1	10090	5
miR-136	DLG3	10116	4
miR-17-5p/20/93.mr/106/519.d	LOC162073	10090	4
miR-365	SEMA3A	10090	5
miR-146	LRRC15	9615	4
miR-181	XYLT1	9606	5
miR-324-5p	FMR1	10116	5
miR-137	DKFZP686A01247	9606	4
miR-27	VANGL1	9606	4
miR-200bc/429	TLL2	9606	4
miR-10	FIZ1	10116	4
miR-15/16/195/424/497	CLDN2	10090	4
miR-370	CFL1	10116	4
miR-323	FAM46A	9606	5
miR-323	RPS6KA3	9606	5
miR-144	SOCS5	9606	4
miR-101	HNRPAB	10116	5
miR-30-3p	DDX3X	10090	9
miR-186	ZMYM2	10090	4
miR-130/301	AR	10090	5
miR-410	ID2	9615	9
miR-27	FNDC3A	9031	5
miR-218	SMEK2	10090	4
miR-181	PSPC1	10116	4
miR-7	REM1	9615	4
miR-145	CFL2	10116	5
miR-378	STX3	9606	4
miR-377	RICTOR	9615	4
miR-137	KIAA1024	9615	4
miR-493-5p	HELZ	10116	4
miR-27	ELAVL2	9031	5
miR-22	ZBTB39	9615	4
miR-185	ST7L	9606	4
miR-331	VCP	9615	4
miR-29	BCL11B	10116	5
miR-323	PJA2	10116	4
miR-188	PHACTR2	9615	4
miR-377	COL13A1	10116	4
miR-101	TSHZ3	10116	10
miR-17-5p/20/93.mr/106/519.d	VSX1	10116	5
miR-200bc/429	PPM1F	9615	8
miR-155	SUFU	9615	5
miR-27	NGFRAP1	10090	4
miR-138	MGC34646	9606	4
miR-182	NCALD	10090	9
miR-299-5p	FOLR1	9615	4
miR-204/211	TAOK2	10090	4
miR-218	NUP50	9606	4
miR-17-5p/20/93.mr/106/519.d	GBF1	9615	4
miR-149	EPB41L1	10116	4
miR-205	LIMS2	9615	4
miR-29	SMTNL2	9615	4
miR-129-5p	RAB21	9615	4
miR-30-5p	NUFIP2	9606	5
miR-331	MEIS1	9031	5
miR-150	JMJD3	9615	4
miR-378	ASXL2	9031	5
miR-199	NFIL3	10116	5
miR-503	OMG	10116	5
miR-323	NUFIP2	9615	4
miR-218	FZD4	10090	4
miR-182	C20orf77	9615	4
miR-125/351	CBFB	9615	5
miR-382	LRCH2	9615	4
miR-101	CDK5R1	9031	5
miR-30-3p	DBF4	9615	4
miR-495	TSC22D3	9606	4
miR-214	PAPD5	10090	4
miR-29	PDGFC	9606	4
miR-503	PPAP2A	10116	4
miR-125/351	ADAMTS4	9606	4
miR-186	INSC	10116	4
miR-329	SIAH1	9615	4
[truncated: 22,555 more rows]
